# Supplementary material for: Multi-kinase control of environmental stress responsive transcription
Source: PLoS One. 2020 Mar 11;15(3):e0230246. doi: 10.1371/journal.pone.0230246 (PMC7065805; doi:10.1371/journal.pone.0230246)
Supplement: S1 Table — GO terms and associated p-values for each of the 10 clusters in Fig 1C. (CSV) [file pone.0230246.s001.csv]

cluster	identifier	description	pValue	count
cluster1	GO:0015980	energy derivation by oxidation of organic compounds	4.62E-19	63
cluster1	GO:0033108	mitochondrial respiratory chain complex assembly	4.71E-17	28
cluster1	GO:0006119	oxidative phosphorylation	5.06E-17	27
cluster1	GO:0045333	cellular respiration	7.27E-17	48
cluster1	GO:0006091	generation of precursor metabolites and energy	1.30E-16	70
cluster1	GO:0017004	cytochrome complex assembly	4.34E-16	26
cluster1	GO:0046034	ATP metabolic process	5.42E-16	43
cluster1	GO:0009205	purine ribonucleoside triphosphate metabolic process	6.73E-16	44
cluster1	GO:0009060	aerobic respiration	6.76E-16	41
cluster1	GO:0042773	ATP synthesis coupled electron transport	6.88E-16	25
cluster1	GO:0042775	mitochondrial ATP synthesis coupled electron transport	6.88E-16	25
cluster1	GO:0009144	purine nucleoside triphosphate metabolic process	1.12E-15	44
cluster1	GO:0022904	respiratory electron transport chain	1.80E-15	27
cluster1	GO:0009199	ribonucleoside triphosphate metabolic process	2.34E-15	44
cluster1	GO:0007005	mitochondrion organization	3.10E-15	75
cluster1	GO:0055114	oxidation-reduction process	6.84E-14	103
cluster1	GO:0009141	nucleoside triphosphate metabolic process	7.27E-14	44
cluster1	GO:0044281	small molecule metabolic process	7.37E-14	152
cluster1	GO:0009117	nucleotide metabolic process	1.64E-13	69
cluster1	GO:0019693	ribose phosphate metabolic process	2.85E-13	57
cluster1	GO:0006753	nucleoside phosphate metabolic process	5.33E-13	69
cluster1	GO:0009150	purine ribonucleotide metabolic process	5.35E-13	50
cluster1	GO:0006163	purine nucleotide metabolic process	1.62E-12	50
cluster1	GO:0022900	electron transport chain	1.91E-12	31
cluster1	GO:0009126	purine nucleoside monophosphate metabolic process	3.69E-12	43
cluster1	GO:0009167	purine ribonucleoside monophosphate metabolic process	3.69E-12	43
cluster1	GO:0006796	phosphate-containing compound metabolic process	9.45E-12	146
cluster1	GO:0072521	purine-containing compound metabolic process	9.66E-12	52
cluster1	GO:0008535	respiratory chain complex IV assembly	9.70E-12	18
cluster1	GO:0006793	phosphorus metabolic process	1.07E-11	148
cluster1	GO:0017144	drug metabolic process	1.96E-11	71
cluster1	GO:0009259	ribonucleotide metabolic process	2.44E-11	50
cluster1	GO:0055086	nucleobase-containing small molecule metabolic process	3.85E-11	71
cluster1	GO:0009161	ribonucleoside monophosphate metabolic process	6.14E-10	43
cluster1	GO:0033617	mitochondrial respiratory chain complex IV assembly	1.12E-09	15
cluster1	GO:0009123	nucleoside monophosphate metabolic process	2.38E-09	44
cluster1	GO:0019637	organophosphate metabolic process	3.98E-09	88
cluster1	GO:0015985	energy coupled proton transport, down electrochemical gradient	9.42E-09	15
cluster1	GO:0015986	ATP synthesis coupled proton transport	9.42E-09	15
cluster1	GO:0006122	mitochondrial electron transport, ubiquinol to cytochrome c	7.33E-08	11
cluster1	GO:0007007	inner mitochondrial membrane organization	1.90E-07	16
cluster1	GO:0032543	mitochondrial translation	2.14E-07	44
cluster1	GO:0042407	cristae formation	5.91E-07	10
cluster1	GO:0098662	inorganic cation transmembrane transport	8.85E-07	38
cluster1	GO:0098655	cation transmembrane transport	1.58E-06	44
cluster1	GO:0015672	monovalent inorganic cation transport	1.86E-06	31
cluster1	GO:1902600	proton transmembrane transport	2.69E-06	28
cluster1	GO:0006812	cation transport	3.66E-06	49
cluster1	GO:0140053	mitochondrial gene expression	6.59E-06	44
cluster1	GO:0016999	antibiotic metabolic process	6.68E-06	22
cluster1	GO:0044262	cellular carbohydrate metabolic process	8.93E-06	44
cluster1	GO:1901135	carbohydrate derivative metabolic process	9.44E-06	71
cluster1	GO:0098660	inorganic ion transmembrane transport	1.06E-05	39
cluster1	GO:0005975	carbohydrate metabolic process	1.44E-05	58
cluster1	GO:0006099	tricarboxylic acid cycle	2.44E-05	14
cluster1	GO:0006101	citrate metabolic process	2.44E-05	14
cluster1	GO:0007006	mitochondrial membrane organization	2.88E-05	19
cluster1	GO:0072350	tricarboxylic acid metabolic process	3.83E-05	14
cluster1	GO:0016310	phosphorylation	4.20E-05	70
cluster1	GO:0010906	regulation of glucose metabolic process	6.00E-05	14
cluster1	GO:0006811	ion transport	6.05E-05	70
cluster1	GO:0005996	monosaccharide metabolic process	7.01E-05	27
cluster1	GO:0019318	hexose metabolic process	7.91E-05	25
cluster1	GO:0006123	mitochondrial electron transport, cytochrome c to oxygen	9.34E-05	9
cluster1	GO:0034220	ion transmembrane transport	1.38E-04	51
cluster1	GO:0016051	carbohydrate biosynthetic process	1.47E-04	29
cluster1	GO:0051259	protein complex oligomerization	1.71E-04	11
cluster1	GO:0043255	regulation of carbohydrate biosynthetic process	1.96E-04	14
cluster1	GO:0019646	aerobic electron transport chain	1.97E-04	9
cluster1	GO:0055085	transmembrane transport	2.54E-04	76
cluster1	GO:0010675	regulation of cellular carbohydrate metabolic process	4.37E-04	15
cluster1	GO:0009145	purine nucleoside triphosphate biosynthetic process	5.07E-04	18
cluster1	GO:0009206	purine ribonucleoside triphosphate biosynthetic process	5.07E-04	18
cluster1	GO:0006109	regulation of carbohydrate metabolic process	5.40E-04	17
cluster1	GO:0006754	ATP biosynthetic process	5.40E-04	17
cluster1	GO:0099132	ATP hydrolysis coupled cation transmembrane transport	5.51E-04	14
cluster1	GO:0006103	2-oxoglutarate metabolic process	6.56E-04	5
cluster1	GO:0006006	glucose metabolic process	9.47E-04	20
cluster1	GO:0005978	glycogen biosynthetic process	0.001246805	10
cluster1	GO:0009201	ribonucleoside triphosphate biosynthetic process	0.001280522	18
cluster1	GO:0005977	glycogen metabolic process	0.001408276	13
cluster1	GO:0051186	cofactor metabolic process	0.001419142	47
cluster1	GO:0017062	respiratory chain complex III assembly	0.00142597	6
cluster1	GO:0034551	mitochondrial respiratory chain complex III assembly	0.00142597	6
cluster1	GO:0006111	regulation of gluconeogenesis	0.00205053	9
cluster1	GO:0006112	energy reserve metabolic process	0.002576737	13
cluster1	GO:0006839	mitochondrial transport	0.002863206	22
cluster1	GO:0009142	nucleoside triphosphate biosynthetic process	0.002947813	18
cluster1	GO:1990542	mitochondrial transmembrane transport	0.003490192	17
cluster1	GO:0072522	purine-containing compound biosynthetic process	0.007180597	23
cluster1	GO:0009152	purine ribonucleotide biosynthetic process	0.009733731	21
cluster1	GO:0006121	mitochondrial electron transport, succinate to ubiquinone	0.009819071	5
cluster1	GO:0006733	oxidoreduction coenzyme metabolic process	0.012167011	22
cluster1	GO:0016311	dephosphorylation	0.014628449	31
cluster1	GO:0006164	purine nucleotide biosynthetic process	0.015264587	21
cluster1	GO:0007031	peroxisome organization	0.017184616	14
cluster1	GO:0062012	regulation of small molecule metabolic process	0.022492045	18
cluster1	GO:0010035	response to inorganic substance	0.042676478	16
cluster1	GO:0046364	monosaccharide biosynthetic process	0.044747285	11
cluster1	GO:0009312	oligosaccharide biosynthetic process	0.045211178	5
cluster1	GO:0070127	tRNA aminoacylation for mitochondrial protein translation	0.045809217	6
cluster3	GO:0043161	proteasome-mediated ubiquitin-dependent protein catabolic process	2.89E-23	49
cluster3	GO:0051603	proteolysis involved in cellular protein catabolic process	6.99E-23	62
cluster3	GO:0010498	proteasomal protein catabolic process	3.51E-22	49
cluster3	GO:0019941	modification-dependent protein catabolic process	5.47E-22	57
cluster3	GO:0044257	cellular protein catabolic process	1.87E-21	62
cluster3	GO:0006511	ubiquitin-dependent protein catabolic process	2.09E-21	56
cluster3	GO:0030163	protein catabolic process	6.84E-21	63
cluster3	GO:0043632	modification-dependent macromolecule catabolic process	4.26E-20	57
cluster3	GO:1901565	organonitrogen compound catabolic process	1.76E-17	69
cluster3	GO:0006508	proteolysis	1.96E-15	68
cluster3	GO:0010499	proteasomal ubiquitin-independent protein catabolic process	2.38E-15	15
cluster3	GO:0044265	cellular macromolecule catabolic process	6.88E-15	67
cluster3	GO:0009057	macromolecule catabolic process	2.55E-13	68
cluster3	GO:0043248	proteasome assembly	7.01E-12	18
cluster3	GO:1901575	organic substance catabolic process	2.55E-10	83
cluster3	GO:0006457	protein folding	4.25E-09	27
cluster3	GO:0006790	sulfur compound metabolic process	1.41E-07	28
cluster3	GO:0042221	response to chemical	4.71E-07	64
cluster3	GO:0006979	response to oxidative stress	1.93E-06	25
cluster3	GO:0042176	regulation of protein catabolic process	2.29E-06	11
cluster3	GO:0009056	catabolic process	2.35E-06	85
cluster3	GO:0034599	cellular response to oxidative stress	3.08E-06	23
cluster3	GO:0006749	glutathione metabolic process	3.37E-06	10
cluster3	GO:0044248	cellular catabolic process	4.25E-06	80
cluster3	GO:0006950	response to stress	5.98E-06	78
cluster3	GO:0045862	positive regulation of proteolysis	8.55E-06	9
cluster3	GO:0030433	ubiquitin-dependent ERAD pathway	1.02E-05	15
cluster3	GO:0055114	oxidation-reduction process	1.05E-05	52
cluster3	GO:0000103	sulfate assimilation	1.85E-05	7
cluster3	GO:0006515	protein quality control for misfolded or incompletely synthesized proteins	5.42E-05	11
cluster3	GO:0036503	ERAD pathway	6.79E-05	15
cluster3	GO:0033554	cellular response to stress	8.13E-05	68
cluster3	GO:1990748	cellular detoxification	1.03E-04	12
cluster3	GO:0009636	response to toxic substance	1.08E-04	16
cluster3	GO:0042026	protein refolding	1.20E-04	8
cluster3	GO:0061136	regulation of proteasomal protein catabolic process	1.20E-04	8
cluster3	GO:0098754	detoxification	1.23E-04	12
cluster3	GO:0030162	regulation of proteolysis	2.24E-04	11
cluster3	GO:0098869	cellular oxidant detoxification	2.24E-04	11
cluster3	GO:0050896	response to stimulus	2.85E-04	102
cluster3	GO:1903050	regulation of proteolysis involved in cellular protein catabolic process	2.98E-04	8
cluster3	GO:1903362	regulation of cellular protein catabolic process	2.98E-04	8
cluster3	GO:0070887	cellular response to chemical stimulus	4.39E-04	42
cluster3	GO:0097237	cellular response to toxic substance	8.13E-04	13
cluster3	GO:0070682	proteasome regulatory particle assembly	8.44E-04	6
cluster3	GO:1901800	positive regulation of proteasomal protein catabolic process	8.44E-04	6
cluster3	GO:1903052	positive regulation of proteolysis involved in cellular protein catabolic process	8.44E-04	6
cluster3	GO:1903364	positive regulation of cellular protein catabolic process	8.44E-04	6
cluster3	GO:0010033	response to organic substance	0.001152459	31
cluster3	GO:0051716	cellular response to stimulus	0.001152763	87
cluster3	GO:0016226	iron-sulfur cluster assembly	0.001260326	8
cluster3	GO:0031163	metallo-sulfur cluster assembly	0.001260326	8
cluster3	GO:0045732	positive regulation of protein catabolic process	0.001340096	6
cluster3	GO:0045899	positive regulation of RNA polymerase II transcriptional preinitiation complex assembly	0.001340096	6
cluster3	GO:0034976	response to endoplasmic reticulum stress	0.001400602	16
cluster3	GO:1901564	organonitrogen compound metabolic process	0.002346555	162
cluster3	GO:0071629	cytoplasm protein quality control by the ubiquitin-proteasome system	0.003578648	5
cluster3	GO:0045898	regulation of RNA polymerase II transcriptional preinitiation complex assembly	0.003579043	6
cluster3	GO:0070647	protein modification by small protein conjugation or removal	0.003631628	26
cluster3	GO:0010243	response to organonitrogen compound	0.004578964	15
cluster3	GO:0050821	protein stabilization	0.006515982	5
cluster3	GO:1901698	response to nitrogen compound	0.006558377	15
cluster3	GO:0032446	protein modification by small protein conjugation	0.007227458	22
cluster3	GO:0009403	toxin biosynthetic process	0.007969866	4
cluster3	GO:0070813	hydrogen sulfide metabolic process	0.007969866	4
cluster3	GO:0070814	hydrogen sulfide biosynthetic process	0.007969866	4
cluster3	GO:0106035	protein maturation by [4Fe-4S] cluster transfer	0.007969866	4
cluster3	GO:0060261	positive regulation of transcription initiation from RNA polymerase II promoter	0.008050081	6
cluster3	GO:2000144	positive regulation of DNA-templated transcription, initiation	0.008050081	6
cluster3	GO:0060260	regulation of transcription initiation from RNA polymerase II promoter	0.00870167	7
cluster3	GO:2000142	regulation of DNA-templated transcription, initiation	0.00870167	7
cluster3	GO:0009086	methionine biosynthetic process	0.009721992	9
cluster3	GO:0016567	protein ubiquitination	0.009824046	19
cluster3	GO:0019538	protein metabolic process	0.009958094	127
cluster3	GO:0010950	positive regulation of endopeptidase activity	0.009990938	3
cluster3	GO:0051186	cofactor metabolic process	0.010402523	28
cluster3	GO:0000096	sulfur amino acid metabolic process	0.013672859	10
cluster3	GO:0000097	sulfur amino acid biosynthetic process	0.013707032	9
cluster3	GO:2000278	regulation of DNA biosynthetic process	0.013834497	6
cluster3	GO:0009404	toxin metabolic process	0.014531357	4
cluster3	GO:0006575	cellular modified amino acid metabolic process	0.014553865	11
cluster3	GO:0006555	methionine metabolic process	0.022689356	9
cluster3	GO:0009408	response to heat	0.024262299	12
cluster3	GO:0065009	regulation of molecular function	0.026380436	36
cluster3	GO:0044267	cellular protein metabolic process	0.029968076	117
cluster3	GO:0031647	regulation of protein stability	0.030877039	5
cluster3	GO:0000709	meiotic joint molecule formation	0.032677056	3
cluster3	GO:0006821	chloride transport	0.032677056	3
cluster3	GO:0042843	D-xylose catabolic process	0.032677056	3
cluster3	GO:0050790	regulation of catalytic activity	0.033404284	34
cluster3	GO:0009266	response to temperature stimulus	0.040884508	12
cluster3	GO:0044272	sulfur compound biosynthetic process	0.040884508	12
cluster3	GO:0046685	response to arsenic-containing substance	0.041019592	5
cluster3	GO:0051972	regulation of telomerase activity	0.041466632	4
cluster3	GO:0032270	positive regulation of cellular protein metabolic process	0.043359355	18
cluster3	GO:0051247	positive regulation of protein metabolic process	0.046417674	18
cluster4	GO:0042221	response to chemical	7.05E-07	99
cluster4	GO:0050896	response to stimulus	1.44E-04	171
cluster4	GO:0051179	localization	0.004094292	191
cluster4	GO:0010498	proteasomal protein catabolic process	0.00466758	34
cluster4	GO:0010033	response to organic substance	0.009890749	46
cluster4	GO:0010243	response to organonitrogen compound	0.01276168	22
cluster4	GO:0044257	cellular protein catabolic process	0.015568712	46
cluster4	GO:0019941	modification-dependent protein catabolic process	0.01615671	40
cluster4	GO:0070887	cellular response to chemical stimulus	0.016343135	60
cluster4	GO:0051716	cellular response to stimulus	0.016608549	136
cluster4	GO:0043161	proteasome-mediated ubiquitin-dependent protein catabolic process	0.016677169	30
cluster4	GO:0006511	ubiquitin-dependent protein catabolic process	0.01745427	40
cluster4	GO:0016192	vesicle-mediated transport	0.01756226	65
cluster4	GO:0051234	establishment of localization	0.017563833	166
cluster4	GO:0065007	biological regulation	0.018230243	237
cluster4	GO:0051641	cellular localization	0.01901979	121
cluster4	GO:1901698	response to nitrogen compound	0.019060855	22
cluster4	GO:0051603	proteolysis involved in cellular protein catabolic process	0.020567523	44
cluster4	GO:0030163	protein catabolic process	0.025236711	47
cluster4	GO:0006508	proteolysis	0.025794642	62
cluster4	GO:0006810	transport	0.026233652	159
cluster4	GO:0072657	protein localization to membrane	0.026240118	25
cluster4	GO:0036503	ERAD pathway	0.026908988	16
cluster4	GO:0034975	protein folding in endoplasmic reticulum	0.027752387	7
cluster4	GO:0034976	response to endoplasmic reticulum stress	0.037023196	20
cluster4	GO:0033036	macromolecule localization	0.040795408	119
cluster4	GO:0044265	cellular macromolecule catabolic process	0.041559889	61
cluster4	GO:1901565	organonitrogen compound catabolic process	0.046843	58
cluster5	GO:0044283	small molecule biosynthetic process	5.72E-06	45
cluster5	GO:0071554	cell wall organization or biogenesis	3.75E-04	34
cluster5	GO:0016126	sterol biosynthetic process	4.77E-04	11
cluster5	GO:0044281	small molecule metabolic process	4.85E-04	65
cluster5	GO:0000920	septum digestion after cytokinesis	5.00E-04	8
cluster5	GO:0045229	external encapsulating structure organization	5.30E-04	30
cluster5	GO:0071555	cell wall organization	5.30E-04	30
cluster5	GO:0006694	steroid biosynthetic process	5.48E-04	11
cluster5	GO:0071852	fungal-type cell wall organization or biogenesis	6.84E-04	28
cluster5	GO:1901617	organic hydroxy compound biosynthetic process	0.00125968	15
cluster5	GO:1902653	secondary alcohol biosynthetic process	0.001466885	9
cluster5	GO:0006696	ergosterol biosynthetic process	0.001622432	9
cluster5	GO:0016129	phytosteroid biosynthetic process	0.001622432	9
cluster5	GO:0044108	cellular alcohol biosynthetic process	0.001622432	9
cluster5	GO:0097384	cellular lipid biosynthetic process	0.001622432	9
cluster5	GO:0008610	lipid biosynthetic process	0.001718748	25
cluster5	GO:0008204	ergosterol metabolic process	0.002293729	9
cluster5	GO:0016128	phytosteroid metabolic process	0.002293729	9
cluster5	GO:0031505	fungal-type cell wall organization	0.002375747	24
cluster5	GO:1902652	secondary alcohol metabolic process	0.002552096	9
cluster5	GO:0016125	sterol metabolic process	0.00261011	11
cluster5	GO:0007165	signal transduction	0.002646507	33
cluster5	GO:0023052	signaling	0.002646507	33
cluster5	GO:0008202	steroid metabolic process	0.002772755	11
cluster5	GO:1901615	organic hydroxy compound metabolic process	0.002876908	19
cluster5	GO:0006566	threonine metabolic process	0.003182899	5
cluster5	GO:0044107	cellular alcohol metabolic process	0.003264352	9
cluster5	GO:0006520	cellular amino acid metabolic process	0.006795716	26
cluster5	GO:0016053	organic acid biosynthetic process	0.007383388	24
cluster5	GO:0046394	carboxylic acid biosynthetic process	0.007383388	24
cluster5	GO:0046165	alcohol biosynthetic process	0.010113067	11
cluster5	GO:0006066	alcohol metabolic process	0.015217962	14
cluster5	GO:0019752	carboxylic acid metabolic process	0.016294188	36
cluster5	GO:0043436	oxoacid metabolic process	0.016550574	37
cluster5	GO:0006082	organic acid metabolic process	0.017632367	37
cluster5	GO:0044255	cellular lipid metabolic process	0.018250716	29
cluster5	GO:0071310	cellular response to organic substance	0.041361796	19
cluster5	GO:0042759	long-chain fatty acid biosynthetic process	0.043674594	3
cluster6	GO:0065007	biological regulation	1.10E-09	188
cluster6	GO:0050789	regulation of biological process	6.65E-09	162
cluster6	GO:0050794	regulation of cellular process	3.34E-08	152
cluster6	GO:0099022	vesicle tethering	3.72E-04	8
cluster6	GO:0061025	membrane fusion	4.91E-04	20
cluster6	GO:0050896	response to stimulus	0.001130157	113
cluster6	GO:0051716	cellular response to stimulus	0.001273916	99
cluster6	GO:0019222	regulation of metabolic process	0.001408308	110
cluster6	GO:0031323	regulation of cellular metabolic process	0.002277596	103
cluster6	GO:0048284	organelle fusion	0.002476322	23
cluster6	GO:0007154	cell communication	0.002592209	51
cluster6	GO:0035556	intracellular signal transduction	0.00281029	31
cluster6	GO:0016043	cellular component organization	0.00317175	159
cluster6	GO:0007165	signal transduction	0.003201387	41
cluster6	GO:0023052	signaling	0.003201387	41
cluster6	GO:0006887	exocytosis	0.005856441	13
cluster6	GO:0016192	vesicle-mediated transport	0.008007691	47
cluster6	GO:0006903	vesicle targeting	0.008459118	8
cluster6	GO:0060255	regulation of macromolecule metabolic process	0.008463901	101
cluster6	GO:0090522	vesicle tethering involved in exocytosis	0.008567245	5
cluster6	GO:0006974	cellular response to DNA damage stimulus	0.008693218	40
cluster6	GO:0032879	regulation of localization	0.008964608	23
cluster6	GO:0009889	regulation of biosynthetic process	0.010060425	83
cluster6	GO:0031326	regulation of cellular biosynthetic process	0.01010956	83
cluster6	GO:0080090	regulation of primary metabolic process	0.010200247	97
cluster6	GO:0035493	SNARE complex assembly	0.010289258	6
cluster6	GO:0051179	localization	0.010344672	124
cluster6	GO:0140029	exocytic process	0.010358857	7
cluster6	GO:0016050	vesicle organization	0.010577128	28
cluster6	GO:0051648	vesicle localization	0.010815465	8
cluster6	GO:0051650	establishment of vesicle localization	0.010815465	8
cluster6	GO:0010556	regulation of macromolecule biosynthetic process	0.01243932	80
cluster6	GO:0008104	protein localization	0.012760257	76
cluster6	GO:2000112	regulation of cellular macromolecule biosynthetic process	0.012804562	79
cluster6	GO:0010468	regulation of gene expression	0.01325728	83
cluster6	GO:0006351	transcription, DNA-templated	0.013682873	71
cluster6	GO:0097659	nucleic acid-templated transcription	0.016302998	71
cluster6	GO:0032774	RNA biosynthetic process	0.017260611	71
cluster6	GO:0048519	negative regulation of biological process	0.017308126	66
cluster6	GO:0051171	regulation of nitrogen compound metabolic process	0.017573577	93
cluster6	GO:0033036	macromolecule localization	0.017631878	82
cluster6	GO:0035542	regulation of SNARE complex assembly	0.017921254	5
cluster6	GO:0032940	secretion by cell	0.018137046	13
cluster6	GO:0046903	secretion	0.018137046	13
cluster6	GO:0019219	regulation of nucleobase-containing compound metabolic process	0.019237116	74
cluster6	GO:0006281	DNA repair	0.019635029	34
cluster6	GO:0006355	regulation of transcription, DNA-templated	0.0210913	66
cluster6	GO:0051234	establishment of localization	0.021263676	110
cluster6	GO:0051252	regulation of RNA metabolic process	0.021995014	69
cluster6	GO:0051128	regulation of cellular component organization	0.022421798	45
cluster6	GO:0044087	regulation of cellular component biogenesis	0.024078235	23
cluster6	GO:1903506	regulation of nucleic acid-templated transcription	0.024219306	66
cluster6	GO:2001141	regulation of RNA biosynthetic process	0.024219306	66
cluster6	GO:0006904	vesicle docking involved in exocytosis	0.026490102	6
cluster6	GO:0043254	regulation of protein complex assembly	0.026558064	17
cluster6	GO:0090087	regulation of peptide transport	0.030520411	7
cluster6	GO:0051049	regulation of transport	0.031604846	16
cluster6	GO:0030258	lipid modification	0.03249535	10
cluster6	GO:0051222	positive regulation of protein transport	0.032616532	4
cluster6	GO:1904951	positive regulation of establishment of protein localization	0.032616532	4
cluster6	GO:0033554	cellular response to stress	0.033215894	64
cluster6	GO:0006810	transport	0.033673953	105
cluster6	GO:0048523	negative regulation of cellular process	0.044770006	56
cluster6	GO:0048278	vesicle docking	0.045004172	8
cluster6	GO:0032880	regulation of protein localization	0.045103995	12
cluster6	GO:0006468	protein phosphorylation	0.045105405	27
cluster6	GO:0051641	cellular localization	0.045230705	78
cluster6	GO:0048518	positive regulation of biological process	0.045392908	66
cluster6	GO:0051649	establishment of localization in cell	0.045430618	61
cluster6	GO:0051223	regulation of protein transport	0.045871361	6
cluster6	GO:0006892	post-Golgi vesicle-mediated transport	0.046010995	13
cluster7	GO:0051276	chromosome organization	6.68E-05	120
cluster7	GO:0060255	regulation of macromolecule metabolic process	7.92E-05	203
cluster7	GO:0010468	regulation of gene expression	9.04E-05	172
cluster7	GO:0019222	regulation of metabolic process	9.21E-05	213
cluster7	GO:0009889	regulation of biosynthetic process	1.06E-04	164
cluster7	GO:0016043	cellular component organization	1.07E-04	314
cluster7	GO:0007049	cell cycle	1.08E-04	144
cluster7	GO:0006355	regulation of transcription, DNA-templated	1.09E-04	134
cluster7	GO:0034654	nucleobase-containing compound biosynthetic process	1.12E-04	184
cluster7	GO:1903506	regulation of nucleic acid-templated transcription	1.14E-04	135
cluster7	GO:2001141	regulation of RNA biosynthetic process	1.14E-04	135
cluster7	GO:0031326	regulation of cellular biosynthetic process	1.16E-04	164
cluster7	GO:0051252	regulation of RNA metabolic process	1.19E-04	140
cluster7	GO:0010556	regulation of macromolecule biosynthetic process	1.21E-04	159
cluster7	GO:0050789	regulation of biological process	1.22E-04	274
cluster7	GO:0034655	nucleobase-containing compound catabolic process	1.23E-04	50
cluster7	GO:0051171	regulation of nitrogen compound metabolic process	1.23E-04	189
cluster7	GO:2000112	regulation of cellular macromolecule biosynthetic process	1.26E-04	157
cluster7	GO:0009101	glycoprotein biosynthetic process	1.35E-04	27
cluster7	GO:0000278	mitotic cell cycle	1.36E-04	83
cluster7	GO:0032774	RNA biosynthetic process	1.38E-04	142
cluster7	GO:0006464	cellular protein modification process	1.41E-04	149
cluster7	GO:0036211	protein modification process	1.41E-04	149
cluster7	GO:0065007	biological regulation	1.47E-04	321
cluster7	GO:0006996	organelle organization	1.47E-04	236
cluster7	GO:0031323	regulation of cellular metabolic process	1.52E-04	197
cluster7	GO:0097659	nucleic acid-templated transcription	1.55E-04	141
cluster7	GO:0070085	glycosylation	1.67E-04	28
cluster7	GO:0006351	transcription, DNA-templated	1.69E-04	140
cluster7	GO:0080090	regulation of primary metabolic process	1.72E-04	194
cluster7	GO:0019438	aromatic compound biosynthetic process	1.78E-04	193
cluster7	GO:0019219	regulation of nucleobase-containing compound metabolic process	1.89E-04	148
cluster7	GO:0009100	glycoprotein metabolic process	1.96E-04	28
cluster7	GO:0018130	heterocycle biosynthetic process	2.06E-04	191
cluster7	GO:0019439	aromatic compound catabolic process	2.08E-04	53
cluster7	GO:1901362	organic cyclic compound biosynthetic process	2.21E-04	197
cluster7	GO:0043412	macromolecule modification	2.36E-04	170
cluster7	GO:0006261	DNA-dependent DNA replication	2.40E-04	37
cluster7	GO:0006325	chromatin organization	2.79E-04	72
cluster7	GO:0006260	DNA replication	3.06E-04	40
cluster7	GO:0050794	regulation of cellular process	3.57E-04	254
cluster7	GO:0043137	DNA replication, removal of RNA primer	3.66E-04	7
cluster7	GO:0006486	protein glycosylation	3.85E-04	25
cluster7	GO:0043413	macromolecule glycosylation	3.85E-04	25
cluster7	GO:1903047	mitotic cell cycle process	5.15E-04	75
cluster7	GO:1901137	carbohydrate derivative biosynthetic process	5.26E-04	59
cluster7	GO:0006271	DNA strand elongation involved in DNA replication	5.91E-04	15
cluster7	GO:0044270	cellular nitrogen compound catabolic process	6.06E-04	52
cluster7	GO:0046700	heterocycle catabolic process	6.06E-04	52
cluster7	GO:0046031	ADP metabolic process	6.10E-04	16
cluster7	GO:0006259	DNA metabolic process	7.69E-04	102
cluster7	GO:1901361	organic cyclic compound catabolic process	7.82E-04	53
cluster7	GO:0009135	purine nucleoside diphosphate metabolic process	8.16E-04	16
cluster7	GO:0009179	purine ribonucleoside diphosphate metabolic process	8.16E-04	16
cluster7	GO:0009185	ribonucleoside diphosphate metabolic process	8.16E-04	16
cluster7	GO:0044770	cell cycle phase transition	9.04E-04	42
cluster7	GO:0044772	mitotic cell cycle phase transition	9.04E-04	42
cluster7	GO:0016070	RNA metabolic process	9.54E-04	239
cluster7	GO:0090304	nucleic acid metabolic process	0.001168274	272
cluster7	GO:0022616	DNA strand elongation	0.001644696	15
cluster7	GO:0010629	negative regulation of gene expression	0.00190447	81
cluster7	GO:0006333	chromatin assembly or disassembly	0.001932458	22
cluster7	GO:0009132	nucleoside diphosphate metabolic process	0.001988282	16
cluster7	GO:0006096	glycolytic process	0.002568968	13
cluster7	GO:0006757	ATP generation from ADP	0.002568968	13
cluster7	GO:0042866	pyruvate biosynthetic process	0.002568968	13
cluster7	GO:0051641	cellular localization	0.002591269	154
cluster7	GO:0048193	Golgi vesicle transport	0.002743003	45
cluster7	GO:0006974	cellular response to DNA damage stimulus	0.003251322	69
cluster7	GO:0006281	DNA repair	0.003408181	61
cluster7	GO:0022402	cell cycle process	0.003455119	113
cluster7	GO:0006401	RNA catabolic process	0.004064087	36
cluster7	GO:0008033	tRNA processing	0.004094856	32
cluster7	GO:0006165	nucleoside diphosphate phosphorylation	0.004957974	13
cluster7	GO:0046939	nucleotide phosphorylation	0.004957974	13
cluster7	GO:0034501	protein localization to kinetochore	0.005954233	7
cluster7	GO:0006139	nucleobase-containing compound metabolic process	0.006808589	299
cluster7	GO:0006890	retrograde vesicle-mediated transport, Golgi to ER	0.006860479	13
cluster7	GO:0006273	lagging strand elongation	0.006929454	9
cluster7	GO:0034398	telomere tethering at nuclear periphery	0.006929454	9
cluster7	GO:0006302	double-strand break repair	0.007968284	32
cluster7	GO:0010605	negative regulation of macromolecule metabolic process	0.00868777	93
cluster7	GO:0018196	peptidyl-asparagine modification	0.009402379	5
cluster7	GO:0018279	protein N-linked glycosylation via asparagine	0.009402379	5
cluster7	GO:0070972	protein localization to endoplasmic reticulum	0.009484594	17
cluster7	GO:0006338	chromatin remodeling	0.010561	24
cluster7	GO:0033567	DNA replication, Okazaki fragment processing	0.011165052	7
cluster7	GO:0048519	negative regulation of biological process	0.011403328	120
cluster7	GO:0006090	pyruvate metabolic process	0.011524261	16
cluster7	GO:0006725	cellular aromatic compound metabolic process	0.012050561	308
cluster7	GO:0051649	establishment of localization in cell	0.013876309	115
cluster7	GO:0097502	mannosylation	0.013931498	15
cluster7	GO:0051726	regulation of cell cycle	0.01418067	54
cluster7	GO:0000819	sister chromatid segregation	0.014397175	35
cluster7	GO:0070727	cellular macromolecule localization	0.014836952	117
cluster7	GO:0009166	nucleotide catabolic process	0.014865278	13
cluster7	GO:0007533	mating type switching	0.015344197	10
cluster7	GO:0009892	negative regulation of metabolic process	0.015352034	96
cluster7	GO:0034397	telomere localization	0.01535733	9
cluster7	GO:0006342	chromatin silencing	0.015402795	35
cluster7	GO:0045814	negative regulation of gene expression, epigenetic	0.015402795	35
cluster7	GO:0033036	macromolecule localization	0.015585627	151
cluster7	GO:2000113	negative regulation of cellular macromolecule biosynthetic process	0.017875104	63
cluster7	GO:0006366	transcription by RNA polymerase II	0.017891112	92
cluster7	GO:0071103	DNA conformation change	0.018494301	29
cluster7	GO:0010558	negative regulation of macromolecule biosynthetic process	0.019000645	64
cluster7	GO:0034728	nucleosome organization	0.019000945	21
cluster7	GO:0006323	DNA packaging	0.019098474	18
cluster7	GO:0071824	protein-DNA complex subunit organization	0.019113922	39
cluster7	GO:0019359	nicotinamide nucleotide biosynthetic process	0.019276739	15
cluster7	GO:0048522	positive regulation of cellular process	0.019336629	121
cluster7	GO:0007017	microtubule-based process	0.02001241	29
cluster7	GO:0006468	protein phosphorylation	0.021379501	47
cluster7	GO:0010453	regulation of cell fate commitment	0.021533698	5
cluster7	GO:0031494	regulation of mating type switching	0.021533698	5
cluster7	GO:0040029	regulation of gene expression, epigenetic	0.021894157	35
cluster7	GO:0046483	heterocycle metabolic process	0.022997326	306
cluster7	GO:0019363	pyridine nucleotide biosynthetic process	0.023429377	15
cluster7	GO:0007530	sex determination	0.023505508	11
cluster7	GO:0007531	mating type determination	0.023505508	11
cluster7	GO:0045165	cell fate commitment	0.023505508	11
cluster7	GO:1901360	organic cyclic compound metabolic process	0.023861715	313
cluster7	GO:0006888	ER to Golgi vesicle-mediated transport	0.024507295	24
cluster7	GO:0043044	ATP-dependent chromatin remodeling	0.027160068	13
cluster7	GO:1901292	nucleoside phosphate catabolic process	0.027160068	13
cluster7	GO:0006354	DNA-templated transcription, elongation	0.027361198	24
cluster7	GO:0046434	organophosphate catabolic process	0.027369265	16
cluster7	GO:0006497	protein lipidation	0.027412785	15
cluster7	GO:0042158	lipoprotein biosynthetic process	0.027412785	15
cluster7	GO:0016458	gene silencing	0.027929565	35
cluster7	GO:0061077	chaperone-mediated protein folding	0.02805291	8
cluster7	GO:1902806	regulation of cell cycle G1/S phase transition	0.02805291	8
cluster7	GO:2000045	regulation of G1/S transition of mitotic cell cycle	0.02805291	8
cluster7	GO:0048518	positive regulation of biological process	0.028448917	122
cluster7	GO:0006402	mRNA catabolic process	0.028789982	29
cluster7	GO:0009890	negative regulation of biosynthetic process	0.029374144	66
cluster7	GO:0031327	negative regulation of cellular biosynthetic process	0.029374144	66
cluster7	GO:0071840	cellular component organization or biogenesis	0.03054778	338
cluster7	GO:0034613	cellular protein localization	0.030596584	111
cluster7	GO:0042157	lipoprotein metabolic process	0.031321385	15
cluster7	GO:0045047	protein targeting to ER	0.031375482	13
cluster7	GO:0000082	G1/S transition of mitotic cell cycle	0.031423921	18
cluster7	GO:0044843	cell cycle G1/S phase transition	0.031423921	18
cluster7	GO:0006661	phosphatidylinositol biosynthetic process	0.031433123	14
cluster7	GO:0045892	negative regulation of transcription, DNA-templated	0.031503486	53
cluster7	GO:0046907	intracellular transport	0.031512375	105
cluster7	GO:0045934	negative regulation of nucleobase-containing compound metabolic process	0.031568991	61
cluster7	GO:1901135	carbohydrate derivative metabolic process	0.032041662	68
cluster7	GO:0051028	mRNA transport	0.032174168	24
cluster7	GO:0016071	mRNA metabolic process	0.032619296	60
cluster7	GO:0008104	protein localization	0.032691222	134
cluster7	GO:1902679	negative regulation of RNA biosynthetic process	0.033204269	54
cluster7	GO:1903507	negative regulation of nucleic acid-templated transcription	0.033204269	54
cluster7	GO:0016310	phosphorylation	0.033390262	69
cluster7	GO:0007062	sister chromatid cohesion	0.033447641	16
cluster7	GO:0006506	GPI anchor biosynthetic process	0.033553711	11
cluster7	GO:0006400	tRNA modification	0.034741365	20
cluster7	GO:0070828	heterochromatin organization	0.035787476	7
cluster7	GO:0000002	mitochondrial genome maintenance	0.035863426	13
cluster7	GO:0072599	establishment of protein localization to endoplasmic reticulum	0.035863426	13
cluster7	GO:0006399	tRNA metabolic process	0.040432137	40
cluster7	GO:0051253	negative regulation of RNA metabolic process	0.040541515	55
cluster7	GO:0000956	nuclear-transcribed mRNA catabolic process	0.040635818	26
cluster7	GO:0007059	chromosome segregation	0.04201597	43
cluster7	GO:0046488	phosphatidylinositol metabolic process	0.043419776	19
cluster7	GO:0031497	chromatin assembly	0.043825034	13
cluster7	GO:0033365	protein localization to organelle	0.047284758	74
cluster7	GO:0031325	positive regulation of cellular metabolic process	0.048557501	92
cluster8	GO:0032543	mitochondrial translation	2.64E-28	59
cluster8	GO:0140053	mitochondrial gene expression	1.25E-25	59
cluster8	GO:0006996	organelle organization	0.004700379	121
cluster8	GO:0070585	protein localization to mitochondrion	0.00825315	15
cluster8	GO:0072655	establishment of protein localization to mitochondrion	0.00825315	15
cluster8	GO:0009059	macromolecule biosynthetic process	0.010140036	145
cluster8	GO:0044271	cellular nitrogen compound biosynthetic process	0.01146663	145
cluster8	GO:0006626	protein targeting to mitochondrion	0.016268793	13
cluster8	GO:0034645	cellular macromolecule biosynthetic process	0.016460231	143
cluster8	GO:0071824	protein-DNA complex subunit organization	0.017288437	25
cluster8	GO:0007006	mitochondrial membrane organization	0.0175423	12
cluster8	GO:0006839	mitochondrial transport	0.017940266	16
cluster8	GO:0006112	energy reserve metabolic process	0.01832414	10
cluster8	GO:0009891	positive regulation of biosynthetic process	0.028767202	44
cluster8	GO:0031328	positive regulation of cellular biosynthetic process	0.028767202	44
cluster8	GO:0071806	protein transmembrane transport	0.040664738	15
cluster8	GO:0005977	glycogen metabolic process	0.041301731	9
cluster8	GO:0006091	generation of precursor metabolites and energy	0.0425197	27
cluster8	GO:0006412	translation	0.047496947	67
cluster8	GO:0044743	protein transmembrane import into intracellular organelle	0.049694728	12
cluster9	GO:0008652	cellular amino acid biosynthetic process	4.73E-09	45
cluster9	GO:0006082	organic acid metabolic process	5.19E-09	100
cluster9	GO:1901605	alpha-amino acid metabolic process	7.04E-09	56
cluster9	GO:0019752	carboxylic acid metabolic process	7.07E-09	96
cluster9	GO:0043436	oxoacid metabolic process	7.31E-09	99
cluster9	GO:1901607	alpha-amino acid biosynthetic process	1.16E-08	42
cluster9	GO:0006520	cellular amino acid metabolic process	3.02E-08	65
cluster9	GO:0044283	small molecule biosynthetic process	3.38E-08	88
cluster9	GO:0044281	small molecule metabolic process	2.33E-07	147
cluster9	GO:0016053	organic acid biosynthetic process	2.63E-07	58
cluster9	GO:0046394	carboxylic acid biosynthetic process	2.63E-07	58
cluster9	GO:0006629	lipid metabolic process	2.40E-06	75
cluster9	GO:0006525	arginine metabolic process	1.30E-05	12
cluster9	GO:0003333	amino acid transmembrane transport	1.36E-05	18
cluster9	GO:0046942	carboxylic acid transport	1.40E-05	31
cluster9	GO:0006526	arginine biosynthetic process	1.87E-05	10
cluster9	GO:1905039	carboxylic acid transmembrane transport	1.91E-05	22
cluster9	GO:0015849	organic acid transport	1.92E-05	31
cluster9	GO:1903825	organic acid transmembrane transport	3.74E-05	22
cluster9	GO:0008610	lipid biosynthetic process	5.04E-05	50
cluster9	GO:0043605	cellular amide catabolic process	5.07E-05	8
cluster9	GO:0000255	allantoin metabolic process	5.37E-05	7
cluster9	GO:0000256	allantoin catabolic process	5.37E-05	7
cluster9	GO:0071941	nitrogen cycle metabolic process	8.23E-05	9
cluster9	GO:0097164	ammonium ion metabolic process	8.54E-05	15
cluster9	GO:0044255	cellular lipid metabolic process	8.61E-05	66
cluster9	GO:0046470	phosphatidylcholine metabolic process	8.70E-05	12
cluster9	GO:0009073	aromatic amino acid family biosynthetic process	1.05E-04	13
cluster9	GO:0006820	anion transport	1.74E-04	46
cluster9	GO:0006656	phosphatidylcholine biosynthetic process	1.82E-04	11
cluster9	GO:0006865	amino acid transport	1.85E-04	20
cluster9	GO:0009084	glutamine family amino acid biosynthetic process	1.88E-04	14
cluster9	GO:0009064	glutamine family amino acid metabolic process	1.95E-04	21
cluster9	GO:0042737	drug catabolic process	2.18E-04	17
cluster9	GO:0098656	anion transmembrane transport	3.40E-04	27
cluster9	GO:0009072	aromatic amino acid family metabolic process	3.50E-04	16
cluster9	GO:0015695	organic cation transport	3.84E-04	10
cluster9	GO:0015711	organic anion transport	4.43E-04	40
cluster9	GO:0055085	transmembrane transport	0.001788049	81
cluster9	GO:0006811	ion transport	0.001818209	72
cluster9	GO:0006657	CDP-choline pathway	0.002230559	5
cluster9	GO:1990822	basic amino acid transmembrane transport	0.002285219	8
cluster9	GO:0015804	neutral amino acid transport	0.003392796	9
cluster9	GO:0015696	ammonium transport	0.003849198	10
cluster9	GO:1901565	organonitrogen compound catabolic process	0.003944969	71
cluster9	GO:0034220	ion transmembrane transport	0.005715047	51
cluster9	GO:0006144	purine nucleobase metabolic process	0.005949884	10
cluster9	GO:0006855	drug transmembrane transport	0.006975929	15
cluster9	GO:0015807	L-amino acid transport	0.009193198	9
cluster9	GO:0009071	serine family amino acid catabolic process	0.009958029	5
cluster9	GO:0008654	phospholipid biosynthetic process	0.011962948	27
cluster9	GO:0006591	ornithine metabolic process	0.01241063	6
cluster9	GO:0019627	urea metabolic process	0.01241063	6
cluster9	GO:0009112	nucleobase metabolic process	0.012523116	13
cluster9	GO:0006790	sulfur compound metabolic process	0.012586053	31
cluster9	GO:1901617	organic hydroxy compound biosynthetic process	0.012719811	22
cluster9	GO:0006637	acyl-CoA metabolic process	0.012731512	9
cluster9	GO:0035383	thioester metabolic process	0.012731512	9
cluster9	GO:0008202	steroid metabolic process	0.012910739	16
cluster9	GO:0008204	ergosterol metabolic process	0.013058166	12
cluster9	GO:0016128	phytosteroid metabolic process	0.013058166	12
cluster9	GO:0006592	ornithine biosynthetic process	0.01325442	4
cluster9	GO:0033865	nucleoside bisphosphate metabolic process	0.013787222	11
cluster9	GO:0033875	ribonucleoside bisphosphate metabolic process	0.013787222	11
cluster9	GO:0034032	purine nucleoside bisphosphate metabolic process	0.013787222	11
cluster9	GO:1902652	secondary alcohol metabolic process	0.014856351	12
cluster9	GO:0006084	acetyl-CoA metabolic process	0.015704961	7
cluster9	GO:0015846	polyamine transport	0.015704961	7
cluster9	GO:0032787	monocarboxylic acid metabolic process	0.016727637	37
cluster9	GO:0006696	ergosterol biosynthetic process	0.017391209	11
cluster9	GO:0016129	phytosteroid biosynthetic process	0.017391209	11
cluster9	GO:0044108	cellular alcohol biosynthetic process	0.017391209	11
cluster9	GO:0097384	cellular lipid biosynthetic process	0.017391209	11
cluster9	GO:0015802	basic amino acid transport	0.017427382	8
cluster9	GO:1902475	L-alpha-amino acid transmembrane transport	0.017427382	8
cluster9	GO:0016126	sterol biosynthetic process	0.018066847	13
cluster9	GO:0006836	neurotransmitter transport	0.018607545	6
cluster9	GO:0046337	phosphatidylethanolamine metabolic process	0.018607545	6
cluster9	GO:1902047	polyamine transmembrane transport	0.018607545	6
cluster9	GO:0006646	phosphatidylethanolamine biosynthetic process	0.019771455	5
cluster9	GO:0046165	alcohol biosynthetic process	0.020687566	17
cluster9	GO:1902653	secondary alcohol biosynthetic process	0.021016088	11
cluster9	GO:0044107	cellular alcohol metabolic process	0.021575861	12
cluster9	GO:0006694	steroid biosynthetic process	0.021788476	13
cluster9	GO:0009085	lysine biosynthetic process	0.022381222	7
cluster9	GO:0016125	sterol metabolic process	0.023940037	15
cluster9	GO:0019878	lysine biosynthetic process via aminoadipic acid	0.032813914	6
cluster9	GO:0006553	lysine metabolic process	0.036649161	7
cluster9	GO:0035384	thioester biosynthetic process	0.04302787	5
cluster9	GO:0071616	acyl-CoA biosynthetic process	0.04302787	5
cluster10	GO:0016050	vesicle organization	3.63E-05	40
cluster10	GO:0007015	actin filament organization	6.30E-05	22
cluster10	GO:0008154	actin polymerization or depolymerization	7.71E-05	14
cluster10	GO:0006897	endocytosis	9.12E-05	27
cluster10	GO:0030041	actin filament polymerization	9.59E-05	13
cluster10	GO:0030833	regulation of actin filament polymerization	9.59E-05	13
cluster10	GO:0008064	regulation of actin polymerization or depolymerization	9.90E-05	13
cluster10	GO:0030832	regulation of actin filament length	9.90E-05	13
cluster10	GO:0030036	actin cytoskeleton organization	1.30E-04	28
cluster10	GO:0009056	catabolic process	1.62E-04	100
cluster10	GO:0098657	import into cell	1.66E-04	27
cluster10	GO:0030029	actin filament-based process	1.69E-04	28
cluster10	GO:0010324	membrane invagination	1.73E-04	23
cluster10	GO:0110053	regulation of actin filament organization	1.83E-04	14
cluster10	GO:0044248	cellular catabolic process	2.54E-04	94
cluster10	GO:0016192	vesicle-mediated transport	4.55E-04	57
cluster10	GO:0032271	regulation of protein polymerization	4.80E-04	14
cluster10	GO:0097435	supramolecular fiber organization	5.71E-04	24
cluster10	GO:1902903	regulation of supramolecular fiber organization	0.001646827	15
cluster10	GO:1901565	organonitrogen compound catabolic process	0.002682617	51
cluster10	GO:1902905	positive regulation of supramolecular fiber organization	0.003276452	12
cluster10	GO:0006906	vesicle fusion	0.003558527	14
cluster10	GO:0051258	protein polymerization	0.00541024	16
cluster10	GO:0006508	proteolysis	0.005504176	52
cluster10	GO:0044257	cellular protein catabolic process	0.005788076	38
cluster10	GO:0006996	organelle organization	0.006032134	138
cluster10	GO:0006914	autophagy	0.00615019	29
cluster10	GO:0007033	vacuole organization	0.006196199	20
cluster10	GO:0090174	organelle membrane fusion	0.006382099	14
cluster10	GO:0030163	protein catabolic process	0.007945256	39
cluster10	GO:0016311	dephosphorylation	0.007971454	26
cluster10	GO:0030838	positive regulation of actin filament polymerization	0.010404434	8
cluster10	GO:0045010	actin nucleation	0.010404434	8
cluster10	GO:1901575	organic substance catabolic process	0.010414019	77
cluster10	GO:0032956	regulation of actin cytoskeleton organization	0.010437569	14
cluster10	GO:0032970	regulation of actin filament-based process	0.010437569	14
cluster10	GO:0051603	proteolysis involved in cellular protein catabolic process	0.010622787	35
cluster10	GO:0048284	organelle fusion	0.010872767	23
cluster10	GO:0061919	process utilizing autophagic mechanism	0.01099008	29
cluster10	GO:0061025	membrane fusion	0.011218505	18
cluster10	GO:0098754	detoxification	0.011997373	11
cluster10	GO:0007034	vacuolar transport	0.012319653	23
cluster10	GO:1903008	organelle disassembly	0.012712152	13
cluster10	GO:0010466	negative regulation of peptidase activity	0.012922819	4
cluster10	GO:0010951	negative regulation of endopeptidase activity	0.012922819	4
cluster10	GO:0034314	Arp2/3 complex-mediated actin nucleation	0.020335486	7
cluster10	GO:0000422	autophagy of mitochondrion	0.020912782	10
cluster10	GO:0061726	mitochondrion disassembly	0.020912782	10
cluster10	GO:0043254	regulation of protein complex assembly	0.025828396	19
cluster10	GO:0016043	cellular component organization	0.033373777	176
cluster10	GO:0032535	regulation of cellular component size	0.034189185	14
cluster10	GO:0090066	regulation of anatomical structure size	0.034189185	14
cluster10	GO:0036257	multivesicular body organization	0.034275326	3
cluster10	GO:0051346	negative regulation of hydrolase activity	0.034705959	8
cluster10	GO:0006511	ubiquitin-dependent protein catabolic process	0.034899304	30
cluster10	GO:1990748	cellular detoxification	0.035122942	10
cluster10	GO:0032273	positive regulation of protein polymerization	0.035159432	9
cluster10	GO:0019941	modification-dependent protein catabolic process	0.037031647	30
cluster10	GO:0072665	protein localization to vacuole	0.037655376	21
cluster10	GO:0007010	cytoskeleton organization	0.037860567	34
cluster10	GO:0016236	macroautophagy	0.041013344	19
cluster10	GO:0016482	cytosolic transport	0.042609906	12
cluster10	GO:0051495	positive regulation of cytoskeleton organization	0.042609906	12
cluster10	GO:0009057	macromolecule catabolic process	0.045091252	51
cluster10	GO:0044804	autophagy of nucleus	0.045553322	10
cluster2	GO:0042254	ribosome biogenesis	1.62E-124	295
cluster2	GO:0022613	ribonucleoprotein complex biogenesis	6.38E-107	311
cluster2	GO:0034660	ncRNA metabolic process	2.36E-100	305
cluster2	GO:0002181	cytoplasmic translation	5.07E-97	166
cluster2	GO:0034470	ncRNA processing	7.62E-86	255
cluster2	GO:0016072	rRNA metabolic process	5.35E-79	224
cluster2	GO:0006364	rRNA processing	8.38E-78	208
cluster2	GO:0042274	ribosomal small subunit biogenesis	4.50E-73	123
cluster2	GO:0030490	maturation of SSU-rRNA	5.21E-63	103
cluster2	GO:0042273	ribosomal large subunit biogenesis	3.35E-59	101
cluster2	GO:0000462	maturation of SSU-rRNA from tricistronic rRNA transcript (SSU-rRNA, 5.8S rRNA, LSU-rRNA)	1.67E-58	94
cluster2	GO:0006396	RNA processing	2.14E-55	266
cluster2	GO:0010467	gene expression	1.23E-51	565
cluster2	GO:0044085	cellular component biogenesis	5.15E-47	396
cluster2	GO:0000460	maturation of 5.8S rRNA	1.23E-37	71
cluster2	GO:0000466	maturation of 5.8S rRNA from tricistronic rRNA transcript (SSU-rRNA, 5.8S rRNA, LSU-rRNA)	6.49E-37	70
cluster2	GO:0042255	ribosome assembly	7.56E-36	65
cluster2	GO:0016070	RNA metabolic process	4.00E-33	414
cluster2	GO:0000469	cleavage involved in rRNA processing	6.55E-32	63
cluster2	GO:0034641	cellular nitrogen compound metabolic process	1.34E-31	629
cluster2	GO:0000478	endonucleolytic cleavage involved in rRNA processing	1.47E-27	49
cluster2	GO:0000479	endonucleolytic cleavage of tricistronic rRNA transcript (SSU-rRNA, 5.8S rRNA, LSU-rRNA)	1.47E-27	49
cluster2	GO:0090304	nucleic acid metabolic process	1.69E-27	447
cluster2	GO:0000470	maturation of LSU-rRNA	8.15E-27	47
cluster2	GO:0043170	macromolecule metabolic process	2.44E-25	677
cluster2	GO:0006405	RNA export from nucleus	1.51E-24	75
cluster2	GO:0000447	endonucleolytic cleavage in ITS1 to separate SSU-rRNA from 5.8S rRNA and LSU-rRNA from tricistronic rRNA transcript (SSU-rRNA, 5.8S rRNA, LSU-rRNA)	5.84E-24	40
cluster2	GO:0051168	nuclear export	6.15E-24	76
cluster2	GO:0006139	nucleobase-containing compound metabolic process	7.43E-24	482
cluster2	GO:0071426	ribonucleoprotein complex export from nucleus	1.10E-23	73
cluster2	GO:0006403	RNA localization	1.95E-23	91
cluster2	GO:0071166	ribonucleoprotein complex localization	4.31E-23	73
cluster2	GO:0006611	protein export from nucleus	4.39E-23	74
cluster2	GO:0071428	rRNA-containing ribonucleoprotein complex export from nucleus	4.47E-23	48
cluster2	GO:0000463	maturation of LSU-rRNA from tricistronic rRNA transcript (SSU-rRNA, 5.8S rRNA, LSU-rRNA)	1.20E-21	38
cluster2	GO:0050658	RNA transport	1.46E-21	83
cluster2	GO:0051236	establishment of RNA localization	1.46E-21	83
cluster2	GO:0050657	nucleic acid transport	4.20E-21	83
cluster2	GO:0006913	nucleocytoplasmic transport	6.03E-21	87
cluster2	GO:0051169	nuclear transport	6.03E-21	87
cluster2	GO:0006399	tRNA metabolic process	1.49E-20	93
cluster2	GO:0006725	cellular aromatic compound metabolic process	1.93E-20	487
cluster2	GO:0071840	cellular component organization or biogenesis	2.72E-20	533
cluster2	GO:0046483	heterocycle metabolic process	5.96E-20	487
cluster2	GO:0006412	translation	9.77E-20	233
cluster2	GO:0043043	peptide biosynthetic process	2.13E-19	233
cluster2	GO:1901360	organic cyclic compound metabolic process	8.35E-19	493
cluster2	GO:0006807	nitrogen compound metabolic process	1.42E-18	724
cluster2	GO:0043604	amide biosynthetic process	1.60E-18	242
cluster2	GO:0000027	ribosomal large subunit assembly	5.59E-18	34
cluster2	GO:0022618	ribonucleoprotein complex assembly	1.31E-17	87
cluster2	GO:0071826	ribonucleoprotein complex subunit organization	2.12E-17	90
cluster2	GO:0000967	rRNA 5'-end processing	3.23E-17	31
cluster2	GO:0006518	peptide metabolic process	1.14E-16	234
cluster2	GO:0031503	protein-containing complex localization	1.42E-16	74
cluster2	GO:0034471	ncRNA 5'-end processing	6.78E-16	32
cluster2	GO:0000480	endonucleolytic cleavage in 5'-ETS of tricistronic rRNA transcript (SSU-rRNA, 5.8S rRNA, LSU-rRNA)	9.14E-16	28
cluster2	GO:0000472	endonucleolytic cleavage to generate mature 5'-end of SSU-rRNA from (SSU-rRNA, 5.8S rRNA, LSU-rRNA)	9.70E-16	29
cluster2	GO:0000966	RNA 5'-end processing	2.68E-15	32
cluster2	GO:0015931	nucleobase-containing compound transport	3.06E-15	87
cluster2	GO:0044238	primary metabolic process	1.31E-14	739
cluster2	GO:0043603	cellular amide metabolic process	3.76E-14	245
cluster2	GO:0071704	organic substance metabolic process	1.45E-13	758
cluster2	GO:0070925	organelle assembly	1.89E-13	77
cluster2	GO:0000054	ribosomal subunit export from nucleus	5.51E-13	33
cluster2	GO:0090501	RNA phosphodiester bond hydrolysis	1.25E-12	78
cluster2	GO:0033750	ribosome localization	1.46E-12	33
cluster2	GO:0034645	cellular macromolecule biosynthetic process	8.06E-12	421
cluster2	GO:0000028	ribosomal small subunit assembly	2.27E-11	23
cluster2	GO:0006407	rRNA export from nucleus	2.69E-11	17
cluster2	GO:0051029	rRNA transport	2.69E-11	17
cluster2	GO:1901566	organonitrogen compound biosynthetic process	2.78E-11	316
cluster2	GO:0009059	macromolecule biosynthetic process	3.01E-11	421
cluster2	GO:0044237	cellular metabolic process	1.02E-10	755
cluster2	GO:0090502	RNA phosphodiester bond hydrolysis, endonucleolytic	1.35E-10	60
cluster2	GO:0044271	cellular nitrogen compound biosynthetic process	2.66E-10	417
cluster2	GO:0097064	ncRNA export from nucleus	8.19E-10	24
cluster2	GO:0090305	nucleic acid phosphodiester bond hydrolysis	1.35E-09	94
cluster2	GO:0098781	ncRNA transcription	1.87E-09	32
cluster2	GO:0042797	tRNA transcription by RNA polymerase III	2.58E-09	16
cluster2	GO:0008152	metabolic process	5.32E-09	776
cluster2	GO:0009304	tRNA transcription	2.08E-08	16
cluster2	GO:0006400	tRNA modification	1.46E-07	37
cluster2	GO:0008033	tRNA processing	5.75E-07	50
cluster2	GO:0044249	cellular biosynthetic process	4.68213E-06	486
cluster2	GO:0006450	regulation of translational fidelity	9.49825E-06	20
cluster2	GO:0009058	biosynthetic process	1.56201E-05	490
cluster2	GO:1901576	organic substance biosynthetic process	1.6962E-05	488
cluster2	GO:0043628	ncRNA 3'-end processing	2.83077E-05	23
cluster2	GO:0010501	RNA secondary structure unwinding	2.88963E-05	17
cluster2	GO:0030488	tRNA methylation	8.27281E-05	15
cluster2	GO:0044260	cellular macromolecule metabolic process	0.000141703	533
cluster2	GO:0000055	ribosomal large subunit export from nucleus	0.000153849	17
cluster2	GO:0002183	cytoplasmic translational initiation	0.000605685	13
cluster2	GO:0031125	rRNA 3'-end processing	0.000883442	14
cluster2	GO:0009116	nucleoside metabolic process	0.002213317	22
cluster2	GO:0009163	nucleoside biosynthetic process	0.00240237	17
cluster2	GO:1902626	assembly of large subunit precursor of preribosome	0.003310042	8
cluster2	GO:0051656	establishment of organelle localization	0.003928872	43
cluster2	GO:0006413	translational initiation	0.004046154	28
cluster2	GO:0009451	RNA modification	0.005597989	55
cluster2	GO:0071042	nuclear polyadenylation-dependent mRNA catabolic process	0.007218384	10
cluster2	GO:0071047	polyadenylation-dependent mRNA catabolic process	0.007218384	10
cluster2	GO:0006417	regulation of translation	0.007884243	44
cluster2	GO:0042455	ribonucleoside biosynthetic process	0.008257146	16
cluster2	GO:0043414	macromolecule methylation	0.009872947	43
cluster2	GO:0016073	snRNA metabolic process	0.01447619	16
cluster2	GO:1901657	glycosyl compound metabolic process	0.018114942	22
cluster2	GO:0032259	methylation	0.01892118	48
cluster2	GO:0043933	protein-containing complex subunit organization	0.019516385	162
cluster2	GO:0016078	tRNA catabolic process	0.019682281	10
cluster2	GO:0071038	nuclear polyadenylation-dependent tRNA catabolic process	0.019682281	10
cluster2	GO:0010608	posttranscriptional regulation of gene expression	0.020004842	46
cluster2	GO:0044267	cellular protein metabolic process	0.021141173	347
cluster2	GO:1901659	glycosyl compound biosynthetic process	0.021292871	17
cluster2	GO:0034248	regulation of cellular amide metabolic process	0.023452473	44
cluster2	GO:0034622	cellular protein-containing complex assembly	0.029980593	133
cluster2	GO:0009119	ribonucleoside metabolic process	0.03437506	17
cluster2	GO:0031123	RNA 3'-end processing	0.036464902	27
cluster2	GO:0006360	transcription by RNA polymerase I	0.046742133	25
