# Supplementary material for: Multi-kinase control of environmental stress responsive transcription
Source: PLoS One. 2020 Mar 11;15(3):e0230246. doi: 10.1371/journal.pone.0230246 (PMC7065805; doi:10.1371/journal.pone.0230246)
Supplement: S4 Table — GO slim terms and associated p-values of sets of genes with residuals that are more than 2.5 standard deviations from the mean in each kinase inhibition/condition dataset. (CSV) [file pone.0230246.s004.csv]

	description	gene_set	identifier	matches	p-value	populationAnnotationCount
0	mitochondrial translation	SSN3_Tunicamycin_overestimated_proper.txt	GO:0032543	9.0	1.82622346192e-05	171.0
1	cellular component organization	MRK1_Azetidine_underestimated_proper.txt	GO:0016043	123.0	2.10830620885e-10	2086.0
2	macromolecular complex subunit organization	MRK1_Azetidine_underestimated_proper.txt	GO:0043933	62.0	4.03837533381e-09	715.0
3	macromolecular complex assembly	MRK1_Azetidine_underestimated_proper.txt	GO:0065003	54.0	6.73214299849e-08	605.0
4	cellular component assembly	MRK1_Azetidine_underestimated_proper.txt	GO:0022607	65.0	3.0349766403e-07	850.0
5	protein complex assembly	MRK1_Azetidine_underestimated_proper.txt	GO:0006461	36.0	7.19150164444e-07	321.0
6	cellular macromolecular complex assembly	MRK1_Azetidine_underestimated_proper.txt	GO:0034622	50.0	9.92747127519e-07	571.0
7	protein complex biogenesis	MRK1_Azetidine_underestimated_proper.txt	GO:0070271	36.0	1.88235329515e-06	332.0
8	protein complex subunit organization	MRK1_Azetidine_underestimated_proper.txt	GO:0071822	38.0	3.25281316568e-06	372.0
9	cellular component organization or biogenesis	MRK1_Azetidine_underestimated_proper.txt	GO:0071840	126.0	7.79470421695e-06	2466.0
10	organelle organization	MRK1_Azetidine_underestimated_proper.txt	GO:0006996	88.0	2.67547214598e-05	1483.0
11	regulation of cellular process	MRK1_Azetidine_underestimated_proper.txt	GO:0050794	94.0	2.68071054282e-05	1634.0
12	regulation of biological process	MRK1_Azetidine_underestimated_proper.txt	GO:0050789	96.0	3.37427825048e-05	1692.0
13	cellular protein complex assembly	MRK1_Azetidine_underestimated_proper.txt	GO:0043623	30.0	5.92697228313e-05	275.0
14	regulation of cellular metabolic process	MRK1_Azetidine_underestimated_proper.txt	GO:0031323	71.0	0.000451080059708	1150.0
15	regulation of metabolic process	MRK1_Azetidine_underestimated_proper.txt	GO:0019222	72.0	0.000547585447888	1179.0
16	regulation of transcription, DNA-templated	MRK1_Azetidine_underestimated_proper.txt	GO:0006355	52.0	0.000703279579963	734.0
17	transcription from RNA polymerase II promoter	MRK1_Azetidine_underestimated_proper.txt	GO:0006366	42.0	0.000755837676118	530.0
18	regulation of macromolecule metabolic process	MRK1_Azetidine_underestimated_proper.txt	GO:0060255	69.0	0.000902326064746	1122.0
19	regulation of nucleic acid-templated transcription	MRK1_Azetidine_underestimated_proper.txt	GO:1903506	52.0	0.00096030785946	741.0
20	regulation of RNA biosynthetic process	MRK1_Azetidine_underestimated_proper.txt	GO:2001141	52.0	0.00096030785946	741.0
21	regulation of primary metabolic process	MRK1_Azetidine_underestimated_proper.txt	GO:0080090	69.0	0.00189835740095	1143.0
22	biological regulation	MRK1_Azetidine_underestimated_proper.txt	GO:0065007	104.0	0.00204135939718	2039.0
23	regulation of RNA metabolic process	MRK1_Azetidine_underestimated_proper.txt	GO:0051252	52.0	0.00269038440993	765.0
24	transcription, DNA-templated	MRK1_Azetidine_underestimated_proper.txt	GO:0006351	53.0	0.00270904159447	787.0
25	regulation of macromolecule biosynthetic process	MRK1_Azetidine_underestimated_proper.txt	GO:0010556	59.0	0.00318266430435	925.0
26	nucleic acid-templated transcription	MRK1_Azetidine_underestimated_proper.txt	GO:0097659	53.0	0.00345980242255	793.0
27	RNA biosynthetic process	MRK1_Azetidine_underestimated_proper.txt	GO:0032774	53.0	0.00406514947915	797.0
28	regulation of cellular macromolecule biosynthetic process	MRK1_Azetidine_underestimated_proper.txt	GO:2000112	58.0	0.00441259475886	911.0
29	regulation of transcription from RNA polymerase II promoter	MRK1_Azetidine_underestimated_proper.txt	GO:0006357	37.0	0.00519468944438	468.0
30	regulation of nucleobase-containing compound metabolic process	MRK1_Azetidine_underestimated_proper.txt	GO:0019219	54.0	0.00911778477853	840.0
31	regulation of cellular biosynthetic process	MRK1_Azetidine_underestimated_proper.txt	GO:0031326	59.0	0.0109518762441	959.0
32	regulation of biosynthetic process	MRK1_Azetidine_underestimated_proper.txt	GO:0009889	59.0	0.0117445003283	961.0
33	regulation of gene expression	MRK1_Azetidine_underestimated_proper.txt	GO:0010468	56.0	0.0121331171422	893.0
34	cellular component biogenesis	MRK1_Azetidine_underestimated_proper.txt	GO:0044085	73.0	0.0129336570654	1299.0
35	regulation of protein complex assembly	MRK1_Azetidine_underestimated_proper.txt	GO:0043254	14.0	0.0188889989011	95.0
36	regulation of organelle organization	MRK1_Azetidine_underestimated_proper.txt	GO:0033043	28.0	0.0214007234053	322.0
37	regulation of nitrogen compound metabolic process	MRK1_Azetidine_underestimated_proper.txt	GO:0051171	59.0	0.0232713647761	981.0
38	chromatin organization	MRK1_Azetidine_underestimated_proper.txt	GO:0006325	29.0	0.0262559737724	344.0
39	regulation of cellular component organization	MRK1_Azetidine_underestimated_proper.txt	GO:0051128	34.0	0.0271203734299	441.0
40	nucleobase-containing compound biosynthetic process	MRK1_Azetidine_underestimated_proper.txt	GO:0034654	61.0	0.027403978275	1033.0
41	regulation of protein ubiquitination	MRK1_Azetidine_underestimated_proper.txt	GO:0031396	7.0	0.0411613632578	23.0
42	positive regulation of transcription, DNA-templated	MRK1_Azetidine_underestimated_proper.txt	GO:0045893	29.0	0.046172194039	354.0
43	positive regulation of RNA biosynthetic process	MRK1_Azetidine_underestimated_proper.txt	GO:1902680	29.0	0.046172194039	354.0
44	positive regulation of nucleic acid-templated transcription	MRK1_Azetidine_underestimated_proper.txt	GO:1903508	29.0	0.046172194039	354.0
45	chromosome organization	MRK1_Azetidine_underestimated_proper.txt	GO:0051276	42.0	0.0479659891603	619.0
46	protein-DNA complex subunit organization	RIM11_GlucoseDepletion_overestimated_proper.txt	GO:0071824	13.0	0.000136131323956	185.0
47	nucleic acid-templated transcription	RIM11_GlucoseDepletion_overestimated_proper.txt	GO:0097659	25.0	0.000262526757647	793.0
48	RNA biosynthetic process	RIM11_GlucoseDepletion_overestimated_proper.txt	GO:0032774	25.0	0.000290703229888	797.0
49	RNA metabolic process	RIM11_GlucoseDepletion_overestimated_proper.txt	GO:0016070	35.0	0.00052684603284	1545.0
50	transcription, DNA-templated	RIM11_GlucoseDepletion_overestimated_proper.txt	GO:0006351	24.0	0.00107441585264	787.0
51	regulation of nucleic acid-templated transcription	RIM11_GlucoseDepletion_overestimated_proper.txt	GO:1903506	23.0	0.0015985105683	741.0
52	regulation of RNA biosynthetic process	RIM11_GlucoseDepletion_overestimated_proper.txt	GO:2001141	23.0	0.0015985105683	741.0
53	transcription initiation from RNA polymerase II promoter	RIM11_GlucoseDepletion_overestimated_proper.txt	GO:0006367	8.0	0.00170146611461	68.0
54	regulation of RNA metabolic process	RIM11_GlucoseDepletion_overestimated_proper.txt	GO:0051252	23.0	0.0028632007664	765.0
55	transcription from RNA polymerase II promoter	RIM11_GlucoseDepletion_overestimated_proper.txt	GO:0006366	19.0	0.00291589743333	530.0
56	regulation of nucleobase-containing compound metabolic process	RIM11_GlucoseDepletion_overestimated_proper.txt	GO:0019219	24.0	0.00369888988041	840.0
57	chromatin organization	RIM11_GlucoseDepletion_overestimated_proper.txt	GO:0006325	15.0	0.00553668701685	344.0
58	regulation of transcription, DNA-templated	RIM11_GlucoseDepletion_overestimated_proper.txt	GO:0006355	22.0	0.00603667299939	734.0
59	DNA-templated transcription, initiation	RIM11_GlucoseDepletion_overestimated_proper.txt	GO:0006352	8.0	0.0105864683639	86.0
60	nucleobase-containing compound biosynthetic process	RIM11_GlucoseDepletion_overestimated_proper.txt	GO:0034654	26.0	0.0119691290127	1033.0
61	transcription elongation from RNA polymerase II promoter	RIM11_GlucoseDepletion_overestimated_proper.txt	GO:0006368	8.0	0.0149799919292	90.0
62	DNA-templated transcriptional preinitiation complex assembly	RIM11_GlucoseDepletion_overestimated_proper.txt	GO:0070897	7.0	0.018093325876	65.0
63	regulation of macromolecule biosynthetic process	RIM11_GlucoseDepletion_overestimated_proper.txt	GO:0010556	24.0	0.0218419079622	925.0
64	protein-DNA complex assembly	RIM11_GlucoseDepletion_overestimated_proper.txt	GO:0065004	9.0	0.0276577779628	130.0
65	nucleic acid metabolic process	RIM11_GlucoseDepletion_overestimated_proper.txt	GO:0090304	35.0	0.0282223954806	1798.0
66	DNA-templated transcription, elongation	RIM11_GlucoseDepletion_overestimated_proper.txt	GO:0006354	8.0	0.0307891375299	99.0
67	aromatic compound biosynthetic process	RIM11_GlucoseDepletion_overestimated_proper.txt	GO:0019438	26.0	0.0410175509823	1101.0
68	regulation of cellular biosynthetic process	RIM11_GlucoseDepletion_overestimated_proper.txt	GO:0031326	24.0	0.0417125268794	959.0
69	regulation of biosynthetic process	RIM11_GlucoseDepletion_overestimated_proper.txt	GO:0009889	24.0	0.0432802432006	961.0
70	ribosome biogenesis	RIM11_Heatshock_underestimated_proper.txt	GO:0042254	135.0	2.2914380723e-33	482.0
71	ribonucleoprotein complex biogenesis	RIM11_Heatshock_underestimated_proper.txt	GO:0022613	149.0	5.85317457611e-33	577.0
72	ncRNA metabolic process	RIM11_Heatshock_underestimated_proper.txt	GO:0034660	150.0	6.24246781912e-33	584.0
73	RNA metabolic process	RIM11_Heatshock_underestimated_proper.txt	GO:0016070	268.0	5.72350839852e-32	1545.0
74	ncRNA processing	RIM11_Heatshock_underestimated_proper.txt	GO:0034470	130.0	2.3807383128e-31	469.0
75	RNA processing	RIM11_Heatshock_underestimated_proper.txt	GO:0006396	153.0	1.0947172271e-28	652.0
76	gene expression	RIM11_Heatshock_underestimated_proper.txt	GO:0010467	316.0	1.03670367572e-27	2099.0
77	nucleic acid metabolic process	RIM11_Heatshock_underestimated_proper.txt	GO:0090304	282.0	7.92374797509e-26	1798.0
78	rRNA processing	RIM11_Heatshock_underestimated_proper.txt	GO:0006364	99.0	8.22000846155e-23	355.0
79	cellular component biogenesis	RIM11_Heatshock_underestimated_proper.txt	GO:0044085	221.0	2.15060059265e-22	1299.0
80	rRNA metabolic process	RIM11_Heatshock_underestimated_proper.txt	GO:0016072	101.0	2.44494332794e-22	372.0
81	nucleobase-containing compound metabolic process	RIM11_Heatshock_underestimated_proper.txt	GO:0006139	295.0	8.07694416643e-21	2043.0
82	cellular aromatic compound metabolic process	RIM11_Heatshock_underestimated_proper.txt	GO:0006725	297.0	2.20365416844e-18	2126.0
83	heterocycle metabolic process	RIM11_Heatshock_underestimated_proper.txt	GO:0046483	297.0	8.00999934516e-18	2141.0
84	cellular macromolecule metabolic process	RIM11_Heatshock_underestimated_proper.txt	GO:0044260	381.0	9.59537090676e-17	3107.0
85	maturation of 5.8S rRNA	RIM11_Heatshock_underestimated_proper.txt	GO:0000460	41.0	1.68848644935e-16	89.0
86	maturation of 5.8S rRNA from tricistronic rRNA transcript (SSU-rRNA, 5.8S rRNA, LSU-rRNA)	RIM11_Heatshock_underestimated_proper.txt	GO:0000466	40.0	9.12861591563e-16	88.0
87	organic cyclic compound metabolic process	RIM11_Heatshock_underestimated_proper.txt	GO:1901360	297.0	1.33250698821e-15	2203.0
88	cellular component organization or biogenesis	RIM11_Heatshock_underestimated_proper.txt	GO:0071840	321.0	2.24458447079e-15	2466.0
89	macromolecule metabolic process	RIM11_Heatshock_underestimated_proper.txt	GO:0043170	386.0	5.41585473946e-15	3221.0
90	cleavage involved in rRNA processing	RIM11_Heatshock_underestimated_proper.txt	GO:0000469	37.0	1.78932158046e-14	81.0
91	cellular nitrogen compound metabolic process	RIM11_Heatshock_underestimated_proper.txt	GO:0034641	347.0	3.62916349757e-14	2792.0
92	ribosomal small subunit biogenesis	RIM11_Heatshock_underestimated_proper.txt	GO:0042274	50.0	8.13078050321e-14	147.0
93	tRNA metabolic process	RIM11_Heatshock_underestimated_proper.txt	GO:0006399	59.0	4.21582643395e-13	203.0
94	nitrogen compound metabolic process	RIM11_Heatshock_underestimated_proper.txt	GO:0006807	355.0	4.33392165986e-11	2987.0
95	maturation of SSU-rRNA	RIM11_Heatshock_underestimated_proper.txt	GO:0030490	41.0	4.61407344403e-11	119.0
96	ribosomal large subunit biogenesis	RIM11_Heatshock_underestimated_proper.txt	GO:0042273	41.0	8.9067926004e-11	121.0
97	maturation of SSU-rRNA from tricistronic rRNA transcript (SSU-rRNA, 5.8S rRNA, LSU-rRNA)	RIM11_Heatshock_underestimated_proper.txt	GO:0000462	38.0	2.12333175837e-10	108.0
98	endonucleolytic cleavage in ITS1 to separate SSU-rRNA from 5.8S rRNA and LSU-rRNA from tricistronic rRNA transcript (SSU-rRNA, 5.8S rRNA, LSU-rRNA)	RIM11_Heatshock_underestimated_proper.txt	GO:0000447	23.0	4.35663584308e-09	46.0
99	endonucleolytic cleavage involved in rRNA processing	RIM11_Heatshock_underestimated_proper.txt	GO:0000478	25.0	2.93795875395e-08	58.0
100	endonucleolytic cleavage of tricistronic rRNA transcript (SSU-rRNA, 5.8S rRNA, LSU-rRNA)	RIM11_Heatshock_underestimated_proper.txt	GO:0000479	25.0	2.93795875395e-08	58.0
101	tRNA processing	RIM11_Heatshock_underestimated_proper.txt	GO:0008033	37.0	3.87425656578e-07	128.0
102	tRNA modification	RIM11_Heatshock_underestimated_proper.txt	GO:0006400	27.0	1.77068486947e-06	78.0
103	macromolecular complex subunit organization	RIM11_Heatshock_underestimated_proper.txt	GO:0043933	113.0	2.44690391395e-06	715.0
104	endonucleolytic cleavage to generate mature 5'-end of SSU-rRNA from (SSU-rRNA, 5.8S rRNA, LSU-rRNA)	RIM11_Heatshock_underestimated_proper.txt	GO:0000472	17.0	8.04125056948e-06	35.0
105	ribonucleoprotein complex subunit organization	RIM11_Heatshock_underestimated_proper.txt	GO:0071826	46.0	1.04690506833e-05	201.0
106	RNA phosphodiester bond hydrolysis	RIM11_Heatshock_underestimated_proper.txt	GO:0090501	45.0	1.19509974393e-05	195.0
107	ribonucleoprotein complex assembly	RIM11_Heatshock_underestimated_proper.txt	GO:0022618	44.0	1.35788156619e-05	189.0
108	rRNA 5'-end processing	RIM11_Heatshock_underestimated_proper.txt	GO:0000967	17.0	1.3955893624e-05	36.0
109	ncRNA 5'-end processing	RIM11_Heatshock_underestimated_proper.txt	GO:0034471	17.0	1.3955893624e-05	36.0
110	RNA 5'-end processing	RIM11_Heatshock_underestimated_proper.txt	GO:0000966	17.0	2.36585307691e-05	37.0
111	endonucleolytic cleavage in 5'-ETS of tricistronic rRNA transcript (SSU-rRNA, 5.8S rRNA, LSU-rRNA)	RIM11_Heatshock_underestimated_proper.txt	GO:0000480	16.0	2.55011733074e-05	33.0
112	cellular macromolecular complex assembly	RIM11_Heatshock_underestimated_proper.txt	GO:0034622	93.0	2.62119421263e-05	571.0
113	macromolecular complex assembly	RIM11_Heatshock_underestimated_proper.txt	GO:0065003	95.0	0.000119385302809	605.0
114	primary metabolic process	RIM11_Heatshock_underestimated_proper.txt	GO:0044238	407.0	0.000186947604887	3879.0
115	RNA biosynthetic process	RIM11_Heatshock_underestimated_proper.txt	GO:0032774	116.0	0.000213760410722	797.0
116	nucleic acid-templated transcription	RIM11_Heatshock_underestimated_proper.txt	GO:0097659	115.0	0.000307344313469	793.0
117	ribosome assembly	RIM11_Heatshock_underestimated_proper.txt	GO:0042255	24.0	0.000318045361065	79.0
118	transcription, DNA-templated	RIM11_Heatshock_underestimated_proper.txt	GO:0006351	114.0	0.000381628221523	787.0
119	cellular metabolic process	RIM11_Heatshock_underestimated_proper.txt	GO:0044237	412.0	0.00110688685343	3978.0
120	RNA modification	RIM11_Heatshock_underestimated_proper.txt	GO:0009451	38.0	0.00353847664582	182.0
121	ribonucleoprotein complex export from nucleus	RIM11_Heatshock_underestimated_proper.txt	GO:0071426	30.0	0.00433232380631	128.0
122	nuclear export	RIM11_Heatshock_underestimated_proper.txt	GO:0051168	31.0	0.0054250800013	136.0
123	nucleobase-containing compound biosynthetic process	RIM11_Heatshock_underestimated_proper.txt	GO:0034654	136.0	0.00563484726235	1033.0
124	ribonucleoprotein complex localization	RIM11_Heatshock_underestimated_proper.txt	GO:0071166	30.0	0.00615556804539	130.0
125	rRNA 3'-end processing	RIM11_Heatshock_underestimated_proper.txt	GO:0031125	11.0	0.00827925586379	23.0
126	rRNA-containing ribonucleoprotein complex export from nucleus	RIM11_Heatshock_underestimated_proper.txt	GO:0071428	19.0	0.0087226022611	63.0
127	nucleic acid phosphodiester bond hydrolysis	RIM11_Heatshock_underestimated_proper.txt	GO:0090305	50.0	0.00939863706637	280.0
128	cellular process	RIM11_Heatshock_underestimated_proper.txt	GO:0009987	499.0	0.00950120072038	5181.0
129	organelle assembly	RIM11_Heatshock_underestimated_proper.txt	GO:0070925	36.0	0.0101574501711	175.0
130	ribosomal large subunit assembly	RIM11_Heatshock_underestimated_proper.txt	GO:0000027	15.0	0.0102381249039	42.0
131	organic substance metabolic process	RIM11_Heatshock_underestimated_proper.txt	GO:0071704	413.0	0.011472624716	4043.0
132	ncRNA 3'-end processing	RIM11_Heatshock_underestimated_proper.txt	GO:0043628	15.0	0.0144174988298	43.0
133	RNA phosphodiester bond hydrolysis, endonucleolytic	RIM11_Heatshock_underestimated_proper.txt	GO:0090502	31.0	0.0144595235698	142.0
134	protein-DNA complex subunit organization	RIM11_Heatshock_underestimated_proper.txt	GO:0071824	37.0	0.0148236094084	185.0
135	maturation of LSU-rRNA	RIM11_Heatshock_underestimated_proper.txt	GO:0000470	17.0	0.021173706208	55.0
136	nucleocytoplasmic transport	RIM11_Heatshock_underestimated_proper.txt	GO:0006913	36.0	0.0264524834225	182.0
137	nuclear transport	RIM11_Heatshock_underestimated_proper.txt	GO:0051169	36.0	0.0301611535893	183.0
138	tRNA methylation	RIM11_Heatshock_underestimated_proper.txt	GO:0030488	10.0	0.044437157043	22.0
139	polyadenylation-dependent RNA catabolic process	RIM11_Heatshock_underestimated_proper.txt	GO:0043633	10.0	0.044437157043	22.0
140	exonucleolytic trimming to generate mature 3'-end of 5.8S rRNA from tricistronic rRNA transcript (SSU-rRNA, 5.8S rRNA, LSU-rRNA)	RIM11_Heatshock_underestimated_proper.txt	GO:0000467	9.0	0.0482837375174	18.0
141	ergosterol metabolic process	SLT2_Menadione_overestimated_proper.txt	GO:0008204	11.0	5.08160327214e-07	34.0
142	phytosteroid metabolic process	SLT2_Menadione_overestimated_proper.txt	GO:0016128	11.0	5.08160327214e-07	34.0
143	secondary alcohol metabolic process	SLT2_Menadione_overestimated_proper.txt	GO:1902652	11.0	7.26675534992e-07	35.0
144	cellular alcohol metabolic process	SLT2_Menadione_overestimated_proper.txt	GO:0044107	11.0	1.43266694177e-06	37.0
145	ergosterol biosynthetic process	SLT2_Menadione_overestimated_proper.txt	GO:0006696	10.0	3.9071401258e-06	31.0
146	phytosteroid biosynthetic process	SLT2_Menadione_overestimated_proper.txt	GO:0016129	10.0	3.9071401258e-06	31.0
147	cellular alcohol biosynthetic process	SLT2_Menadione_overestimated_proper.txt	GO:0044108	10.0	3.9071401258e-06	31.0
148	cellular lipid biosynthetic process	SLT2_Menadione_overestimated_proper.txt	GO:0097384	10.0	3.9071401258e-06	31.0
149	sterol biosynthetic process	SLT2_Menadione_overestimated_proper.txt	GO:0016126	11.0	4.89749205365e-06	41.0
150	small molecule biosynthetic process	SLT2_Menadione_overestimated_proper.txt	GO:0044283	28.0	4.95555148199e-06	336.0
151	secondary alcohol biosynthetic process	SLT2_Menadione_overestimated_proper.txt	GO:1902653	10.0	5.56856418549e-06	32.0
152	steroid biosynthetic process	SLT2_Menadione_overestimated_proper.txt	GO:0006694	11.0	6.50519393835e-06	42.0
153	sterol metabolic process	SLT2_Menadione_overestimated_proper.txt	GO:0016125	12.0	6.95028708048e-06	53.0
154	steroid metabolic process	SLT2_Menadione_overestimated_proper.txt	GO:0008202	12.0	8.76424227979e-06	54.0
155	single-organism biosynthetic process	SLT2_Menadione_overestimated_proper.txt	GO:0044711	41.0	2.10178730467e-05	706.0
156	alcohol biosynthetic process	SLT2_Menadione_overestimated_proper.txt	GO:0046165	12.0	3.8891219296e-05	61.0
157	lipid biosynthetic process	SLT2_Menadione_overestimated_proper.txt	GO:0008610	21.0	4.40535234843e-05	213.0
158	alcohol metabolic process	SLT2_Menadione_overestimated_proper.txt	GO:0006066	14.0	0.000137443096397	97.0
159	organic hydroxy compound biosynthetic process	SLT2_Menadione_overestimated_proper.txt	GO:1901617	13.0	0.000162688099625	83.0
160	cellular lipid metabolic process	SLT2_Menadione_overestimated_proper.txt	GO:0044255	24.0	0.000653734389858	318.0
161	organic hydroxy compound metabolic process	SLT2_Menadione_overestimated_proper.txt	GO:1901615	15.0	0.0018394881427	137.0
162	lipid metabolic process	SLT2_Menadione_overestimated_proper.txt	GO:0006629	24.0	0.00254991272376	342.0
163	small molecule metabolic process	SLT2_Menadione_overestimated_proper.txt	GO:0044281	40.0	0.00331198393001	810.0
164	single-organism metabolic process	SLT2_Menadione_overestimated_proper.txt	GO:0044710	56.0	0.0454198860641	1470.0
165	cellular protein catabolic process	SCH9_Azetidine_overestimated_proper.txt	GO:0044257	22.0	4.2181996336e-05	270.0
166	protein catabolic process	SCH9_Azetidine_overestimated_proper.txt	GO:0030163	22.0	0.000157476781153	290.0
167	proteolysis involved in cellular protein catabolic process	SCH9_Azetidine_overestimated_proper.txt	GO:0051603	20.0	0.000304650380454	250.0
168	ubiquitin-dependent protein catabolic process	SCH9_Azetidine_overestimated_proper.txt	GO:0006511	19.0	0.000381790753816	229.0
169	modification-dependent protein catabolic process	SCH9_Azetidine_overestimated_proper.txt	GO:0019941	19.0	0.000381790753816	229.0
170	proteasome-mediated ubiquitin-dependent protein catabolic process	SCH9_Azetidine_overestimated_proper.txt	GO:0043161	15.0	0.00120695336991	153.0
171	proteasomal protein catabolic process	SCH9_Azetidine_overestimated_proper.txt	GO:0010498	15.0	0.00155924711127	156.0
172	modification-dependent macromolecule catabolic process	SCH9_Azetidine_overestimated_proper.txt	GO:0043632	19.0	0.00163827030456	251.0
173	cellular macromolecule catabolic process	SCH9_Azetidine_overestimated_proper.txt	GO:0044265	24.0	0.00508256733235	412.0
174	cellular catabolic process	SCH9_Azetidine_overestimated_proper.txt	GO:0044248	30.0	0.0155736866459	636.0
175	proteolysis	SCH9_Azetidine_overestimated_proper.txt	GO:0006508	23.0	0.0269030954877	421.0
176	macromolecule catabolic process	SCH9_Azetidine_overestimated_proper.txt	GO:0009057	24.0	0.0296573006232	455.0
177	secretion by cell	HOG1_Heatshock_overestimated_proper.txt	GO:0032940	6.0	0.0273134255831	71.0
178	secretion	HOG1_Heatshock_overestimated_proper.txt	GO:0046903	6.0	0.0273134255831	71.0
179	regulation of biological process	CDC15_Tunicamycin_overestimated_proper.txt	GO:0050789	202.0	7.9672515428e-08	1692.0
180	regulation of cellular process	CDC15_Tunicamycin_overestimated_proper.txt	GO:0050794	196.0	1.36212369898e-07	1634.0
181	biological regulation	CDC15_Tunicamycin_overestimated_proper.txt	GO:0065007	224.0	1.5867213397e-05	2039.0
182	positive regulation of biological process	CDC15_Tunicamycin_overestimated_proper.txt	GO:0048518	97.0	2.65281066362e-05	682.0
183	trehalose biosynthetic process	CDC15_Tunicamycin_overestimated_proper.txt	GO:0005992	7.0	0.000114790610611	7.0
184	single-organism process	CDC15_Tunicamycin_overestimated_proper.txt	GO:0044699	331.0	0.000132648091449	3416.0
185	regulation of macromolecule metabolic process	CDC15_Tunicamycin_overestimated_proper.txt	GO:0060255	136.0	0.000487671611856	1122.0
186	cell wall organization or biogenesis	CDC15_Tunicamycin_overestimated_proper.txt	GO:0071554	49.0	0.000489946071612	278.0
187	regulation of RNA metabolic process	CDC15_Tunicamycin_overestimated_proper.txt	GO:0051252	101.0	0.000650395985001	765.0
188	fungal-type cell wall organization or biogenesis	CDC15_Tunicamycin_overestimated_proper.txt	GO:0071852	40.0	0.00073586681286	208.0
189	disaccharide biosynthetic process	CDC15_Tunicamycin_overestimated_proper.txt	GO:0046351	7.0	0.000853189195593	8.0
190	regulation of metabolic process	CDC15_Tunicamycin_overestimated_proper.txt	GO:0019222	140.0	0.00107389288685	1179.0
191	regulation of cellular metabolic process	CDC15_Tunicamycin_overestimated_proper.txt	GO:0031323	137.0	0.00127601368977	1150.0
192	positive regulation of cellular process	CDC15_Tunicamycin_overestimated_proper.txt	GO:0048522	90.0	0.00140853803655	667.0
193	regulation of primary metabolic process	CDC15_Tunicamycin_overestimated_proper.txt	GO:0080090	136.0	0.00155960232822	1143.0
194	regulation of transcription, DNA-templated	CDC15_Tunicamycin_overestimated_proper.txt	GO:0006355	96.0	0.00231335934501	734.0
195	regulation of nucleobase-containing compound metabolic process	CDC15_Tunicamycin_overestimated_proper.txt	GO:0019219	106.0	0.00306683710919	840.0
196	oligosaccharide biosynthetic process	CDC15_Tunicamycin_overestimated_proper.txt	GO:0009312	7.0	0.00356662225525	9.0
197	regulation of nucleic acid-templated transcription	CDC15_Tunicamycin_overestimated_proper.txt	GO:1903506	96.0	0.00363680512552	741.0
198	regulation of RNA biosynthetic process	CDC15_Tunicamycin_overestimated_proper.txt	GO:2001141	96.0	0.00363680512552	741.0
199	regulation of transcription from RNA polymerase II promoter	CDC15_Tunicamycin_overestimated_proper.txt	GO:0006357	68.0	0.00365315408389	468.0
200	positive regulation of macromolecule metabolic process	CDC15_Tunicamycin_overestimated_proper.txt	GO:0010604	72.0	0.00434771605086	508.0
201	transcription from RNA polymerase II promoter	CDC15_Tunicamycin_overestimated_proper.txt	GO:0006366	74.0	0.00540564270793	530.0
202	positive regulation of nucleobase-containing compound metabolic process	CDC15_Tunicamycin_overestimated_proper.txt	GO:0045935	59.0	0.00571286229729	390.0
203	positive regulation of RNA metabolic process	CDC15_Tunicamycin_overestimated_proper.txt	GO:0051254	56.0	0.00583682225755	363.0
204	regulation of gene expression	CDC15_Tunicamycin_overestimated_proper.txt	GO:0010468	110.0	0.00608429155404	893.0
205	positive regulation of metabolic process	CDC15_Tunicamycin_overestimated_proper.txt	GO:0009893	74.0	0.00626570207318	532.0
206	positive regulation of gene expression	CDC15_Tunicamycin_overestimated_proper.txt	GO:0010628	59.0	0.0123155993692	399.0
207	single-organism cellular process	CDC15_Tunicamycin_overestimated_proper.txt	GO:0044763	285.0	0.0133708063734	2937.0
208	negative regulation of cellular process	CDC15_Tunicamycin_overestimated_proper.txt	GO:0048523	80.0	0.0160367126461	604.0
209	regulation of cellular macromolecule biosynthetic process	CDC15_Tunicamycin_overestimated_proper.txt	GO:2000112	110.0	0.0165669498819	911.0
210	transcription, DNA-templated	CDC15_Tunicamycin_overestimated_proper.txt	GO:0006351	98.0	0.0172844027975	787.0
211	external encapsulating structure organization	CDC15_Tunicamycin_overestimated_proper.txt	GO:0045229	39.0	0.0186209329082	226.0
212	cell wall organization	CDC15_Tunicamycin_overestimated_proper.txt	GO:0071555	39.0	0.0186209329082	226.0
213	regulation of macromolecule biosynthetic process	CDC15_Tunicamycin_overestimated_proper.txt	GO:0010556	111.0	0.0199638119422	925.0
214	nucleic acid-templated transcription	CDC15_Tunicamycin_overestimated_proper.txt	GO:0097659	98.0	0.0243737557495	793.0
215	negative regulation of biological process	CDC15_Tunicamycin_overestimated_proper.txt	GO:0048519	80.0	0.0287869668647	613.0
216	positive regulation of transcription, DNA-templated	CDC15_Tunicamycin_overestimated_proper.txt	GO:0045893	53.0	0.0291269239975	354.0
217	positive regulation of RNA biosynthetic process	CDC15_Tunicamycin_overestimated_proper.txt	GO:1902680	53.0	0.0291269239975	354.0
218	positive regulation of nucleic acid-templated transcription	CDC15_Tunicamycin_overestimated_proper.txt	GO:1903508	53.0	0.0291269239975	354.0
219	RNA biosynthetic process	CDC15_Tunicamycin_overestimated_proper.txt	GO:0032774	98.0	0.0305204232737	797.0
220	regulation of cellular biosynthetic process	CDC15_Tunicamycin_overestimated_proper.txt	GO:0031326	113.0	0.0388905285136	959.0
221	positive regulation of transcription from RNA polymerase II promoter	CDC15_Tunicamycin_overestimated_proper.txt	GO:0045944	48.0	0.0392772540511	312.0
222	regulation of nitrogen compound metabolic process	CDC15_Tunicamycin_overestimated_proper.txt	GO:0051171	115.0	0.0402663135631	981.0
223	positive regulation of nitrogen compound metabolic process	CDC15_Tunicamycin_overestimated_proper.txt	GO:0051173	61.0	0.0410789958288	433.0
224	fungal-type cell wall organization	CDC15_Tunicamycin_overestimated_proper.txt	GO:0031505	32.0	0.0418113503185	175.0
225	regulation of biosynthetic process	CDC15_Tunicamycin_overestimated_proper.txt	GO:0009889	113.0	0.0429974623835	961.0
226	actin filament organization	CDC15_Tunicamycin_overestimated_proper.txt	GO:0007015	19.0	0.0484696188504	78.0
227	protein localization to endoplasmic reticulum	RIM15_Azetidine_underestimated_proper.txt	GO:0070972	7.0	0.0183976188122	54.0
228	endocytosis	YPK1_Heatshock_overestimated_proper.txt	GO:0006897	33.0	3.21859944678e-06	126.0
229	vesicle organization	YPK1_Heatshock_overestimated_proper.txt	GO:0016050	45.0	1.54230624432e-05	220.0
230	vesicle-mediated transport	YPK1_Heatshock_overestimated_proper.txt	GO:0016192	66.0	4.55977927212e-05	402.0
231	protein localization to vacuole	YPK1_Heatshock_overestimated_proper.txt	GO:0072665	30.0	0.000218275527428	126.0
232	protein targeting to vacuole	YPK1_Heatshock_overestimated_proper.txt	GO:0006623	29.0	0.000383974585681	122.0
233	establishment of protein localization to vacuole	YPK1_Heatshock_overestimated_proper.txt	GO:0072666	29.0	0.000383974585681	122.0
234	actin filament organization	YPK1_Heatshock_overestimated_proper.txt	GO:0007015	22.0	0.00060335927139	78.0
235	vacuolar transport	YPK1_Heatshock_overestimated_proper.txt	GO:0007034	36.0	0.0010035843571	179.0
236	autophagy	YPK1_Heatshock_overestimated_proper.txt	GO:0006914	35.0	0.00148836974454	174.0
237	membrane invagination	YPK1_Heatshock_overestimated_proper.txt	GO:0010324	25.0	0.00247951311315	104.0
238	protein transport	YPK1_Heatshock_overestimated_proper.txt	GO:0015031	82.0	0.00315598607094	600.0
239	supramolecular fiber organization	YPK1_Heatshock_overestimated_proper.txt	GO:0097435	26.0	0.00437485842914	114.0
240	CVT pathway	YPK1_Heatshock_overestimated_proper.txt	GO:0032258	16.0	0.0123285832809	53.0
241	establishment of protein localization	YPK1_Heatshock_overestimated_proper.txt	GO:0045184	82.0	0.0133546422092	621.0
242	intracellular protein transport	YPK1_Heatshock_overestimated_proper.txt	GO:0006886	59.0	0.0158252750028	402.0
243	nucleophagy	YPK1_Heatshock_overestimated_proper.txt	GO:0044804	14.0	0.0196098978105	43.0
244	single-organism organelle organization	YPK1_Heatshock_overestimated_proper.txt	GO:1902589	74.0	0.0258873632617	552.0
245	single-organism process	YPK1_Heatshock_overestimated_proper.txt	GO:0044699	321.0	0.0262024841365	3416.0
246	protein localization	YPK1_Heatshock_overestimated_proper.txt	GO:0008104	94.0	0.0329362055795	757.0
247	oxidoreduction coenzyme metabolic process	SNF1_GlucoseDepletion_underestimated_proper.txt	GO:0006733	23.0	1.76124309319e-10	101.0
248	nicotinamide nucleotide metabolic process	SNF1_GlucoseDepletion_underestimated_proper.txt	GO:0046496	21.0	4.34226728614e-10	85.0
249	pyridine nucleotide metabolic process	SNF1_GlucoseDepletion_underestimated_proper.txt	GO:0019362	21.0	5.58833436366e-10	86.0
250	pyridine-containing compound metabolic process	SNF1_GlucoseDepletion_underestimated_proper.txt	GO:0072524	21.0	8.87867826144e-09	98.0
251	coenzyme metabolic process	SNF1_GlucoseDepletion_underestimated_proper.txt	GO:0006732	28.0	1.25283917998e-08	185.0
252	cofactor metabolic process	SNF1_GlucoseDepletion_underestimated_proper.txt	GO:0051186	29.0	6.27815227542e-07	232.0
253	glycolytic process	SNF1_GlucoseDepletion_underestimated_proper.txt	GO:0006096	12.0	7.70627212726e-07	33.0
254	ATP generation from ADP	SNF1_GlucoseDepletion_underestimated_proper.txt	GO:0006757	12.0	7.70627212726e-07	33.0
255	ADP metabolic process	SNF1_GlucoseDepletion_underestimated_proper.txt	GO:0046031	13.0	9.36149938807e-07	41.0
256	purine nucleoside diphosphate metabolic process	SNF1_GlucoseDepletion_underestimated_proper.txt	GO:0009135	13.0	1.31830303626e-06	42.0
257	purine ribonucleoside diphosphate metabolic process	SNF1_GlucoseDepletion_underestimated_proper.txt	GO:0009179	13.0	1.31830303626e-06	42.0
258	ribonucleoside diphosphate metabolic process	SNF1_GlucoseDepletion_underestimated_proper.txt	GO:0009185	13.0	1.31830303626e-06	42.0
259	nucleoside diphosphate phosphorylation	SNF1_GlucoseDepletion_underestimated_proper.txt	GO:0006165	12.0	1.71224075785e-06	35.0
260	pyruvate metabolic process	SNF1_GlucoseDepletion_underestimated_proper.txt	GO:0006090	14.0	2.10258642197e-06	52.0
261	nucleoside diphosphate metabolic process	SNF1_GlucoseDepletion_underestimated_proper.txt	GO:0009132	13.0	3.46581550873e-06	45.0
262	nucleotide phosphorylation	SNF1_GlucoseDepletion_underestimated_proper.txt	GO:0046939	12.0	1.86629105926e-05	42.0
263	phosphate-containing compound metabolic process	SNF1_GlucoseDepletion_underestimated_proper.txt	GO:0006796	54.0	7.98808304366e-05	795.0
264	single-organism metabolic process	SNF1_GlucoseDepletion_underestimated_proper.txt	GO:0044710	81.0	8.65002723629e-05	1470.0
265	carbohydrate metabolic process	SNF1_GlucoseDepletion_underestimated_proper.txt	GO:0005975	30.0	0.000181026585722	313.0
266	single-organism carbohydrate metabolic process	SNF1_GlucoseDepletion_underestimated_proper.txt	GO:0044723	27.0	0.000268189409696	265.0
267	phosphorus metabolic process	SNF1_GlucoseDepletion_underestimated_proper.txt	GO:0006793	54.0	0.000293969432871	825.0
268	single-organism catabolic process	SNF1_GlucoseDepletion_underestimated_proper.txt	GO:0044712	30.0	0.000456851251032	326.0
269	nucleotide metabolic process	SNF1_GlucoseDepletion_underestimated_proper.txt	GO:0009117	25.0	0.000861229366222	245.0
270	nucleoside phosphate metabolic process	SNF1_GlucoseDepletion_underestimated_proper.txt	GO:0006753	25.0	0.00118080348017	249.0
271	carbohydrate derivative metabolic process	SNF1_GlucoseDepletion_underestimated_proper.txt	GO:1901135	32.0	0.00120437364619	379.0
272	organophosphate metabolic process	SNF1_GlucoseDepletion_underestimated_proper.txt	GO:0019637	35.0	0.00129575875048	440.0
273	nucleobase-containing small molecule metabolic process	SNF1_GlucoseDepletion_underestimated_proper.txt	GO:0055086	26.0	0.00163326927181	271.0
274	response to endoplasmic reticulum stress	SNF1_GlucoseDepletion_underestimated_proper.txt	GO:0034976	13.0	0.0285571264964	92.0
275	ribosome biogenesis	SCH9_Menadione_overestimated_proper.txt	GO:0042254	156.0	1.24404912183e-17	482.0
276	ncRNA metabolic process	SCH9_Menadione_overestimated_proper.txt	GO:0034660	177.0	5.14985161866e-17	584.0
277	ribosomal small subunit biogenesis	SCH9_Menadione_overestimated_proper.txt	GO:0042274	66.0	1.52213892013e-13	147.0
278	ribonucleoprotein complex biogenesis	SCH9_Menadione_overestimated_proper.txt	GO:0022613	166.0	3.51560886332e-13	577.0
279	ncRNA processing	SCH9_Menadione_overestimated_proper.txt	GO:0034470	142.0	8.56409275082e-13	469.0
280	carbohydrate derivative biosynthetic process	SCH9_Menadione_overestimated_proper.txt	GO:1901137	85.0	2.27666384521e-10	242.0
281	rRNA processing	SCH9_Menadione_overestimated_proper.txt	GO:0006364	110.0	6.5145846362e-10	355.0
282	rRNA metabolic process	SCH9_Menadione_overestimated_proper.txt	GO:0016072	113.0	1.31716718628e-09	372.0
283	maturation of SSU-rRNA from tricistronic rRNA transcript (SSU-rRNA, 5.8S rRNA, LSU-rRNA)	SCH9_Menadione_overestimated_proper.txt	GO:0000462	49.0	1.32315932676e-09	108.0
284	maturation of SSU-rRNA	SCH9_Menadione_overestimated_proper.txt	GO:0030490	52.0	1.54248649114e-09	119.0
285	ribosomal large subunit biogenesis	SCH9_Menadione_overestimated_proper.txt	GO:0042273	50.0	5.77976081505e-08	121.0
286	cellular component organization or biogenesis	SCH9_Menadione_overestimated_proper.txt	GO:0071840	479.0	5.00358948999e-07	2466.0
287	cellular component biogenesis	SCH9_Menadione_overestimated_proper.txt	GO:0044085	282.0	6.08279493362e-07	1299.0
288	RNA processing	SCH9_Menadione_overestimated_proper.txt	GO:0006396	162.0	8.99123626758e-07	652.0
289	mitotic cell cycle process	SCH9_Menadione_overestimated_proper.txt	GO:1903047	104.0	1.89955509971e-06	369.0
290	mitotic cell cycle	SCH9_Menadione_overestimated_proper.txt	GO:0000278	110.0	6.16116169588e-06	405.0
291	mitotic nuclear division	SCH9_Menadione_overestimated_proper.txt	GO:0007067	60.0	4.11390147648e-05	184.0
292	glycoprotein metabolic process	SCH9_Menadione_overestimated_proper.txt	GO:0009100	35.0	5.89019241924e-05	84.0
293	rRNA-containing ribonucleoprotein complex export from nucleus	SCH9_Menadione_overestimated_proper.txt	GO:0071428	29.0	7.23984227963e-05	63.0
294	glycoprotein biosynthetic process	SCH9_Menadione_overestimated_proper.txt	GO:0009101	34.0	7.63069059442e-05	81.0
295	protein glycosylation	SCH9_Menadione_overestimated_proper.txt	GO:0006486	33.0	9.85382498608e-05	78.0
296	macromolecule glycosylation	SCH9_Menadione_overestimated_proper.txt	GO:0043413	33.0	9.85382498608e-05	78.0
297	glycosylation	SCH9_Menadione_overestimated_proper.txt	GO:0070085	35.0	0.000173868636121	87.0
298	cell division	SCH9_Menadione_overestimated_proper.txt	GO:0051301	85.0	0.000357692151314	310.0
299	tRNA metabolic process	SCH9_Menadione_overestimated_proper.txt	GO:0006399	62.0	0.000371196820329	203.0
300	GPI anchor metabolic process	SCH9_Menadione_overestimated_proper.txt	GO:0006505	18.0	0.00092385707976	32.0
301	mitotic spindle organization	SCH9_Menadione_overestimated_proper.txt	GO:0007052	20.0	0.00146245387579	39.0
302	microtubule cytoskeleton organization involved in mitosis	SCH9_Menadione_overestimated_proper.txt	GO:1902850	20.0	0.00146245387579	39.0
303	GPI anchor biosynthetic process	SCH9_Menadione_overestimated_proper.txt	GO:0006506	17.0	0.00177154890507	30.0
304	endonucleolytic cleavage in ITS1 to separate SSU-rRNA from 5.8S rRNA and LSU-rRNA from tricistronic rRNA transcript (SSU-rRNA, 5.8S rRNA, LSU-rRNA)	SCH9_Menadione_overestimated_proper.txt	GO:0000447	22.0	0.00180053653682	46.0
305	nuclear division	SCH9_Menadione_overestimated_proper.txt	GO:0000280	79.0	0.00196525444917	292.0
306	nuclear export	SCH9_Menadione_overestimated_proper.txt	GO:0051168	45.0	0.00199765809249	136.0
307	maturation of 5.8S rRNA	SCH9_Menadione_overestimated_proper.txt	GO:0000460	33.0	0.00408924927846	89.0
308	ribonucleoprotein complex export from nucleus	SCH9_Menadione_overestimated_proper.txt	GO:0071426	42.0	0.00630188966762	128.0
309	ribosome assembly	SCH9_Menadione_overestimated_proper.txt	GO:0042255	30.0	0.00723757706915	79.0
310	maturation of 5.8S rRNA from tricistronic rRNA transcript (SSU-rRNA, 5.8S rRNA, LSU-rRNA)	SCH9_Menadione_overestimated_proper.txt	GO:0000466	32.0	0.00987802393175	88.0
311	ribonucleoprotein complex localization	SCH9_Menadione_overestimated_proper.txt	GO:0071166	42.0	0.00998649988111	130.0
312	organelle assembly	SCH9_Menadione_overestimated_proper.txt	GO:0070925	52.0	0.0109443690389	175.0
313	carbohydrate derivative metabolic process	SCH9_Menadione_overestimated_proper.txt	GO:1901135	94.0	0.011029768178	379.0
314	cell cycle process	SCH9_Menadione_overestimated_proper.txt	GO:0022402	145.0	0.013146437084	649.0
315	spindle organization	SCH9_Menadione_overestimated_proper.txt	GO:0007051	21.0	0.0134445125364	47.0
316	glycolipid metabolic process	SCH9_Menadione_overestimated_proper.txt	GO:0006664	18.0	0.0156067240047	37.0
317	liposaccharide metabolic process	SCH9_Menadione_overestimated_proper.txt	GO:1903509	18.0	0.0156067240047	37.0
318	mitotic sister chromatid segregation	SCH9_Menadione_overestimated_proper.txt	GO:0000070	43.0	0.0177646399437	137.0
319	glycolipid biosynthetic process	SCH9_Menadione_overestimated_proper.txt	GO:0009247	17.0	0.0182631913449	34.0
320	nuclear transport	SCH9_Menadione_overestimated_proper.txt	GO:0051169	53.0	0.020463819719	183.0
321	membrane lipid biosynthetic process	SCH9_Menadione_overestimated_proper.txt	GO:0046467	26.0	0.0314546263821	68.0
322	sister chromatid segregation	SCH9_Menadione_overestimated_proper.txt	GO:0000819	47.0	0.0328289774145	158.0
323	nucleocytoplasmic transport	SCH9_Menadione_overestimated_proper.txt	GO:0006913	52.0	0.0389230392424	182.0
324	rRNA 5'-end processing	SCH9_Menadione_overestimated_proper.txt	GO:0000967	17.0	0.0489964297863	36.0
325	ncRNA 5'-end processing	SCH9_Menadione_overestimated_proper.txt	GO:0034471	17.0	0.0489964297863	36.0
326	regulation of cellular process	CDC5_Menadione_overestimated_proper.txt	GO:0050794	47.0	1.18259419367e-07	1634.0
327	regulation of biological process	CDC5_Menadione_overestimated_proper.txt	GO:0050789	47.0	4.52541334769e-07	1692.0
328	biological regulation	CDC5_Menadione_overestimated_proper.txt	GO:0065007	51.0	1.28008309625e-06	2039.0
329	regulation of cellular component organization	CDC5_Menadione_overestimated_proper.txt	GO:0051128	22.0	2.96325143682e-05	441.0
330	positive regulation of cellular process	CDC5_Menadione_overestimated_proper.txt	GO:0048522	27.0	3.01341249903e-05	667.0
331	positive regulation of biological process	CDC5_Menadione_overestimated_proper.txt	GO:0048518	27.0	4.91598262309e-05	682.0
332	negative regulation of cellular process	CDC5_Menadione_overestimated_proper.txt	GO:0048523	24.0	0.000433985565427	604.0
333	negative regulation of biological process	CDC5_Menadione_overestimated_proper.txt	GO:0048519	24.0	0.00057673502071	613.0
334	positive regulation of cellular component organization	CDC5_Menadione_overestimated_proper.txt	GO:0051130	12.0	0.00100120924198	149.0
335	endocytosis	CDC5_Menadione_overestimated_proper.txt	GO:0006897	11.0	0.00150926815752	126.0
336	regulation of endocytosis	CDC5_Menadione_overestimated_proper.txt	GO:0030100	5.0	0.00964262953414	18.0
337	actin cortical patch organization	CDC5_Menadione_overestimated_proper.txt	GO:0044396	5.0	0.0129595377021	19.0
338	actin cytoskeleton organization	CDC5_Menadione_overestimated_proper.txt	GO:0030036	10.0	0.016496132956	129.0
339	positive regulation of protein complex assembly	CDC5_Menadione_overestimated_proper.txt	GO:0031334	7.0	0.0183520454424	54.0
340	actin filament-based process	CDC5_Menadione_overestimated_proper.txt	GO:0030029	10.0	0.0232907244151	134.0
341	mitochondrial translation	CDC15_Fluconazole_overestimated_proper.txt	GO:0032543	10.0	3.29207668499e-06	171.0
342	small molecule metabolic process	TOR2_GlucoseDepletion_underestimated_proper.txt	GO:0044281	57.0	5.8177646655e-09	810.0
343	alpha-amino acid metabolic process	TOR2_GlucoseDepletion_underestimated_proper.txt	GO:1901605	26.0	2.00540324314e-08	189.0
344	oxoacid metabolic process	TOR2_GlucoseDepletion_underestimated_proper.txt	GO:0043436	38.0	6.17279735674e-07	450.0
345	alpha-amino acid biosynthetic process	TOR2_GlucoseDepletion_underestimated_proper.txt	GO:1901607	20.0	6.46173616977e-07	127.0
346	organic acid metabolic process	TOR2_GlucoseDepletion_underestimated_proper.txt	GO:0006082	38.0	6.5931613085e-07	451.0
347	cellular amino acid biosynthetic process	TOR2_GlucoseDepletion_underestimated_proper.txt	GO:0008652	20.0	2.00898972092e-06	135.0
348	organic acid biosynthetic process	TOR2_GlucoseDepletion_underestimated_proper.txt	GO:0016053	24.0	2.74107150432e-06	200.0
349	carboxylic acid biosynthetic process	TOR2_GlucoseDepletion_underestimated_proper.txt	GO:0046394	24.0	2.74107150432e-06	200.0
350	carboxylic acid metabolic process	TOR2_GlucoseDepletion_underestimated_proper.txt	GO:0019752	36.0	3.33381632346e-06	433.0
351	cellular amino acid metabolic process	TOR2_GlucoseDepletion_underestimated_proper.txt	GO:0006520	27.0	3.54749939004e-06	255.0
352	small molecule biosynthetic process	TOR2_GlucoseDepletion_underestimated_proper.txt	GO:0044283	28.0	0.000362117233959	336.0
353	single-organism biosynthetic process	TOR2_GlucoseDepletion_underestimated_proper.txt	GO:0044711	40.0	0.0160946727007	706.0
354	single-organism metabolic process	TOR2_GlucoseDepletion_underestimated_proper.txt	GO:0044710	66.0	0.0163795249126	1470.0
355	histidine biosynthetic process	TOR2_GlucoseDepletion_underestimated_proper.txt	GO:0000105	5.0	0.0165780881658	10.0
356	histidine metabolic process	TOR2_GlucoseDepletion_underestimated_proper.txt	GO:0006547	5.0	0.0165780881658	10.0
357	imidazole-containing compound metabolic process	TOR2_GlucoseDepletion_underestimated_proper.txt	GO:0052803	5.0	0.0165780881658	10.0
358	IMP metabolic process	TOR2_GlucoseDepletion_underestimated_proper.txt	GO:0046040	5.0	0.0498152947494	12.0
359	organic acid biosynthetic process	WT3_Menadione_underestimated_proper.txt	GO:0016053	12.0	0.0123765644731	200.0
360	carboxylic acid biosynthetic process	WT3_Menadione_underestimated_proper.txt	GO:0046394	12.0	0.0123765644731	200.0
361	vacuolar acidification	TOR2_SDC_overestimated_proper.txt	GO:0007035	15.0	2.5501916162e-08	27.0
362	pH reduction	TOR2_SDC_overestimated_proper.txt	GO:0045851	15.0	2.5501916162e-08	27.0
363	intracellular pH reduction	TOR2_SDC_overestimated_proper.txt	GO:0051452	15.0	2.5501916162e-08	27.0
364	regulation of cellular pH	TOR2_SDC_overestimated_proper.txt	GO:0030641	16.0	7.61808185473e-08	33.0
365	regulation of intracellular pH	TOR2_SDC_overestimated_proper.txt	GO:0051453	16.0	7.61808185473e-08	33.0
366	regulation of pH	TOR2_SDC_overestimated_proper.txt	GO:0006885	16.0	4.01668151677e-07	36.0
367	monovalent inorganic cation homeostasis	TOR2_SDC_overestimated_proper.txt	GO:0055067	18.0	5.22531621332e-07	47.0
368	small molecule metabolic process	TOR2_SDC_overestimated_proper.txt	GO:0044281	94.0	8.23168577297e-07	810.0
369	ATP hydrolysis coupled proton transport	TOR2_SDC_overestimated_proper.txt	GO:0015991	10.0	9.1588605445e-07	13.0
370	cellular monovalent inorganic cation homeostasis	TOR2_SDC_overestimated_proper.txt	GO:0030004	17.0	9.69653146745e-07	43.0
371	mitochondrial translation	TOR2_SDC_overestimated_proper.txt	GO:0032543	34.0	3.19158481646e-06	171.0
372	energy coupled proton transmembrane transport, against electrochemical gradient	TOR2_SDC_overestimated_proper.txt	GO:0015988	10.0	4.97180077864e-05	17.0
373	single-organism biosynthetic process	TOR2_SDC_overestimated_proper.txt	GO:0044711	80.0	9.27243692604e-05	706.0
374	small molecule biosynthetic process	TOR2_SDC_overestimated_proper.txt	GO:0044283	46.0	0.000826377784934	336.0
375	oxoacid metabolic process	TOR2_SDC_overestimated_proper.txt	GO:0043436	56.0	0.000916565273281	450.0
376	organic acid metabolic process	TOR2_SDC_overestimated_proper.txt	GO:0006082	56.0	0.000989057651881	451.0
377	carboxylic acid metabolic process	TOR2_SDC_overestimated_proper.txt	GO:0019752	54.0	0.00146900725535	433.0
378	hydrogen ion transmembrane transport	TOR2_SDC_overestimated_proper.txt	GO:1902600	17.0	0.00385907905448	70.0
379	single-organism metabolic process	TOR2_SDC_overestimated_proper.txt	GO:0044710	129.0	0.0124472479319	1470.0
380	coenzyme metabolic process	TOR2_SDC_overestimated_proper.txt	GO:0006732	29.0	0.0127474223589	185.0
381	monocarboxylic acid metabolic process	TOR2_SDC_overestimated_proper.txt	GO:0032787	29.0	0.0127474223589	185.0
382	oxidoreduction coenzyme metabolic process	TOR2_SDC_overestimated_proper.txt	GO:0006733	20.0	0.0133215045537	101.0
383	nucleotide metabolic process	TOR2_SDC_overestimated_proper.txt	GO:0009117	34.0	0.0288112531795	245.0
384	inorganic cation transmembrane transport	TOR2_SDC_overestimated_proper.txt	GO:0098662	21.0	0.0335694904901	116.0
385	nucleoside phosphate metabolic process	TOR2_SDC_overestimated_proper.txt	GO:0006753	34.0	0.0413481119773	249.0
386	nucleobase-containing small molecule metabolic process	TOR2_SDC_overestimated_proper.txt	GO:0055086	36.0	0.0417135412971	271.0
387	cation transmembrane transport	TOR2_SDC_overestimated_proper.txt	GO:0098655	25.0	0.0485951133263	157.0
388	glycoprotein metabolic process	KIN1_Tunicamycin_overestimated_proper.txt	GO:0009100	10.0	0.00119322075919	84.0
389	protein glycosylation	KIN1_Tunicamycin_overestimated_proper.txt	GO:0006486	9.0	0.00657226889087	78.0
390	macromolecule glycosylation	KIN1_Tunicamycin_overestimated_proper.txt	GO:0043413	9.0	0.00657226889087	78.0
391	glycoprotein biosynthetic process	KIN1_Tunicamycin_overestimated_proper.txt	GO:0009101	9.0	0.00908005491291	81.0
392	glycosylation	KIN1_Tunicamycin_overestimated_proper.txt	GO:0070085	9.0	0.0166589130348	87.0
393	ATP-dependent chromatin remodeling	YPK3_Azetidine_overestimated_proper.txt	GO:0043044	8.0	6.12379230936e-06	39.0
394	nucleosome disassembly	YPK3_Azetidine_overestimated_proper.txt	GO:0006337	6.0	7.06064754737e-05	20.0
395	chromatin disassembly	YPK3_Azetidine_overestimated_proper.txt	GO:0031498	6.0	7.06064754737e-05	20.0
396	nucleosome organization	YPK3_Azetidine_overestimated_proper.txt	GO:0034728	9.0	7.49106501252e-05	75.0
397	protein-DNA complex disassembly	YPK3_Azetidine_overestimated_proper.txt	GO:0032986	6.0	9.81224069346e-05	21.0
398	chromatin remodeling	YPK3_Azetidine_overestimated_proper.txt	GO:0006338	8.0	0.00545689723942	90.0
399	chromatin organization	YPK3_Azetidine_overestimated_proper.txt	GO:0006325	13.0	0.0350020802595	344.0
400	macromolecule modification	YPK3_Azetidine_overestimated_proper.txt	GO:0043412	23.0	0.0399835641566	1032.0
401	oxidation-reduction process	YPK3_Menadione_overestimated_proper.txt	GO:0055114	54.0	2.20723906538e-05	456.0
402	protein transmembrane transport	YPK3_Menadione_overestimated_proper.txt	GO:0071806	20.0	0.000521255714794	98.0
403	single-organism process	YPK3_Menadione_overestimated_proper.txt	GO:0044699	220.0	0.000674936727812	3416.0
404	single-organism metabolic process	YPK3_Menadione_overestimated_proper.txt	GO:0044710	116.0	0.000991645336367	1470.0
405	intracellular protein transmembrane transport	YPK3_Menadione_overestimated_proper.txt	GO:0065002	19.0	0.00129019154166	94.0
406	response to oxidative stress	YPK3_Menadione_overestimated_proper.txt	GO:0006979	22.0	0.00161318970382	124.0
407	nicotinamide nucleotide metabolic process	YPK3_Menadione_overestimated_proper.txt	GO:0046496	17.0	0.00658860577179	85.0
408	pyridine nucleotide metabolic process	YPK3_Menadione_overestimated_proper.txt	GO:0019362	17.0	0.00782821446027	86.0
409	cellular response to oxidative stress	YPK3_Menadione_overestimated_proper.txt	GO:0034599	20.0	0.00786365151202	115.0
410	pyridine-containing compound metabolic process	YPK3_Menadione_overestimated_proper.txt	GO:0072524	18.0	0.0117925989571	98.0
411	cofactor metabolic process	YPK3_Menadione_overestimated_proper.txt	GO:0051186	30.0	0.0145761018695	232.0
412	single-organism intracellular transport	YPK3_Menadione_overestimated_proper.txt	GO:1902582	32.0	0.0153064815705	257.0
413	oxidoreduction coenzyme metabolic process	YPK3_Menadione_overestimated_proper.txt	GO:0006733	18.0	0.0185270627694	101.0
414	glutathione metabolic process	YPK3_Menadione_overestimated_proper.txt	GO:0006749	8.0	0.0190099453519	20.0
415	sulfur compound metabolic process	YPK3_Menadione_overestimated_proper.txt	GO:0006790	22.0	0.0280423512566	146.0
416	pentose-phosphate shunt, oxidative branch	YPK3_Menadione_overestimated_proper.txt	GO:0009051	5.0	0.0376840522892	7.0
417	positive regulation of actin nucleation	YPK3_Menadione_overestimated_proper.txt	GO:0051127	5.0	0.0376840522892	7.0
418	positive regulation of Arp2/3 complex-mediated actin nucleation	YPK3_Menadione_overestimated_proper.txt	GO:2000601	5.0	0.0376840522892	7.0
419	glucose 6-phosphate metabolic process	YPK3_Menadione_overestimated_proper.txt	GO:0051156	9.0	0.0380372275488	28.0
420	response to chemical	YPK3_Menadione_overestimated_proper.txt	GO:0042221	51.0	0.0449094656521	530.0
421	coenzyme metabolic process	YPK3_Menadione_overestimated_proper.txt	GO:0006732	25.0	0.0470139280486	185.0
422	external encapsulating structure organization	SLT2_GlucoseDepletion_underestimated_proper.txt	GO:0045229	6.0	0.000504147452914	226.0
423	cell wall organization	SLT2_GlucoseDepletion_underestimated_proper.txt	GO:0071555	6.0	0.000504147452914	226.0
424	cell wall organization or biogenesis	SLT2_GlucoseDepletion_underestimated_proper.txt	GO:0071554	6.0	0.00173947493938	278.0
425	fungal-type cell wall organization	SLT2_GlucoseDepletion_underestimated_proper.txt	GO:0031505	5.0	0.00706817179661	175.0
426	fungal-type cell wall organization or biogenesis	SLT2_GlucoseDepletion_underestimated_proper.txt	GO:0071852	5.0	0.0166680549777	208.0
427	response to oxidative stress	WT1_Menadione_overestimated_proper.txt	GO:0006979	24.0	9.80950476408e-08	124.0
428	oxidation-reduction process	WT1_Menadione_overestimated_proper.txt	GO:0055114	45.0	4.98072698068e-06	456.0
429	cellular response to oxidative stress	WT1_Menadione_overestimated_proper.txt	GO:0034599	21.0	5.98456526529e-06	115.0
430	response to stress	WT1_Menadione_overestimated_proper.txt	GO:0006950	58.0	0.00325313792294	818.0
431	protein refolding	WT1_Menadione_overestimated_proper.txt	GO:0042026	7.0	0.00734391863771	17.0
432	age-dependent response to reactive oxygen species	WT1_Menadione_overestimated_proper.txt	GO:0001315	4.0	0.0103810343507	4.0
433	protein folding	WT1_Menadione_overestimated_proper.txt	GO:0006457	16.0	0.0153493652236	110.0
434	response to abiotic stimulus	WT1_Menadione_overestimated_proper.txt	GO:0009628	21.0	0.0266263679359	185.0
435	cellular oxidant detoxification	WT1_Menadione_overestimated_proper.txt	GO:0098869	9.0	0.0268048135167	36.0
436	cofactor metabolic process	WT1_Menadione_overestimated_proper.txt	GO:0051186	24.0	0.0283737729762	232.0
437	detoxification	WT1_Menadione_overestimated_proper.txt	GO:0098754	9.0	0.0342587072121	37.0
438	cellular detoxification	WT1_Menadione_overestimated_proper.txt	GO:1990748	9.0	0.0342587072121	37.0
439	anion transmembrane transport	KSS1_Salt_underestimated_proper.txt	GO:0098656	8.0	0.000483107836194	95.0
440	ion transmembrane transport	KSS1_Salt_underestimated_proper.txt	GO:0034220	11.0	0.00062013935325	236.0
441	anion transport	KSS1_Salt_underestimated_proper.txt	GO:0006820	10.0	0.00108317480628	195.0
442	ion transport	KSS1_Salt_underestimated_proper.txt	GO:0006811	13.0	0.00304859226224	410.0
443	carboxylic acid transmembrane transport	KSS1_Salt_underestimated_proper.txt	GO:1905039	6.0	0.00936937959222	61.0
444	organic acid transmembrane transport	KSS1_Salt_underestimated_proper.txt	GO:1903825	6.0	0.0113592271083	63.0
445	transmembrane transport	KSS1_Salt_underestimated_proper.txt	GO:0055085	13.0	0.0148462422515	471.0
446	amino acid transmembrane transport	KSS1_Salt_underestimated_proper.txt	GO:0003333	5.0	0.0321573879942	43.0
447	organic anion transport	KSS1_Salt_underestimated_proper.txt	GO:0015711	8.0	0.0381296453824	168.0
448	regulation of cellular process	CTK1_Salt_overestimated_proper.txt	GO:0050794	85.0	5.84709117342e-08	1634.0
449	regulation of biological process	CTK1_Salt_overestimated_proper.txt	GO:0050789	86.0	1.49169153461e-07	1692.0
450	biological regulation	CTK1_Salt_overestimated_proper.txt	GO:0065007	95.0	8.1119372223e-07	2039.0
451	regulation of nucleobase-containing compound metabolic process	CTK1_Salt_overestimated_proper.txt	GO:0019219	54.0	1.92099934587e-06	840.0
452	regulation of RNA metabolic process	CTK1_Salt_overestimated_proper.txt	GO:0051252	51.0	2.00721724889e-06	765.0
453	regulation of transcription, DNA-templated	CTK1_Salt_overestimated_proper.txt	GO:0006355	49.0	4.9298324457e-06	734.0
454	cellular response to stimulus	CTK1_Salt_overestimated_proper.txt	GO:0051716	62.0	6.7281859827e-06	1084.0
455	regulation of nucleic acid-templated transcription	CTK1_Salt_overestimated_proper.txt	GO:1903506	49.0	6.86594371493e-06	741.0
456	regulation of RNA biosynthetic process	CTK1_Salt_overestimated_proper.txt	GO:2001141	49.0	6.86594371493e-06	741.0
457	regulation of cellular macromolecule biosynthetic process	CTK1_Salt_overestimated_proper.txt	GO:2000112	55.0	1.34676699455e-05	911.0
458	transcription, DNA-templated	CTK1_Salt_overestimated_proper.txt	GO:0006351	50.0	1.767499314e-05	787.0
459	positive regulation of nucleobase-containing compound metabolic process	CTK1_Salt_overestimated_proper.txt	GO:0045935	33.0	1.82545348814e-05	390.0
460	nucleic acid-templated transcription	CTK1_Salt_overestimated_proper.txt	GO:0097659	50.0	2.30057145444e-05	793.0
461	regulation of macromolecule biosynthetic process	CTK1_Salt_overestimated_proper.txt	GO:0010556	55.0	2.38339003831e-05	925.0
462	RNA biosynthetic process	CTK1_Salt_overestimated_proper.txt	GO:0032774	50.0	2.73733306853e-05	797.0
463	positive regulation of macromolecule metabolic process	CTK1_Salt_overestimated_proper.txt	GO:0010604	38.0	3.08171218493e-05	508.0
464	regulation of cellular biosynthetic process	CTK1_Salt_overestimated_proper.txt	GO:0031326	56.0	3.15383190652e-05	959.0
465	regulation of biosynthetic process	CTK1_Salt_overestimated_proper.txt	GO:0009889	56.0	3.4102109484e-05	961.0
466	organelle organization	CTK1_Salt_overestimated_proper.txt	GO:0006996	74.0	3.55370416503e-05	1483.0
467	positive regulation of RNA metabolic process	CTK1_Salt_overestimated_proper.txt	GO:0051254	31.0	4.79648043215e-05	363.0
468	regulation of gene expression	CTK1_Salt_overestimated_proper.txt	GO:0010468	53.0	5.6327600228e-05	893.0
469	regulation of primary metabolic process	CTK1_Salt_overestimated_proper.txt	GO:0080090	62.0	5.92927656546e-05	1143.0
470	cellular component organization	CTK1_Salt_overestimated_proper.txt	GO:0016043	92.0	6.28252133109e-05	2086.0
471	regulation of nitrogen compound metabolic process	CTK1_Salt_overestimated_proper.txt	GO:0051171	56.0	7.34678495458e-05	981.0
472	regulation of cellular metabolic process	CTK1_Salt_overestimated_proper.txt	GO:0031323	62.0	7.57589590604e-05	1150.0
473	regulation of macromolecule metabolic process	CTK1_Salt_overestimated_proper.txt	GO:0060255	61.0	7.71695120028e-05	1122.0
474	positive regulation of cellular metabolic process	CTK1_Salt_overestimated_proper.txt	GO:0031325	38.0	8.55266948763e-05	527.0
475	response to stimulus	CTK1_Salt_overestimated_proper.txt	GO:0050896	65.0	9.65715309014e-05	1244.0
476	transcription from RNA polymerase II promoter	CTK1_Salt_overestimated_proper.txt	GO:0006366	38.0	9.997033864e-05	530.0
477	positive regulation of transcription, DNA-templated	CTK1_Salt_overestimated_proper.txt	GO:0045893	30.0	0.000103875541772	354.0
478	positive regulation of RNA biosynthetic process	CTK1_Salt_overestimated_proper.txt	GO:1902680	30.0	0.000103875541772	354.0
479	positive regulation of nucleic acid-templated transcription	CTK1_Salt_overestimated_proper.txt	GO:1903508	30.0	0.000103875541772	354.0
480	positive regulation of metabolic process	CTK1_Salt_overestimated_proper.txt	GO:0009893	38.0	0.000110791131747	532.0
481	regulation of metabolic process	CTK1_Salt_overestimated_proper.txt	GO:0019222	62.0	0.000203540976647	1179.0
482	positive regulation of cellular process	CTK1_Salt_overestimated_proper.txt	GO:0048522	43.0	0.000218488475236	667.0
483	positive regulation of nitrogen compound metabolic process	CTK1_Salt_overestimated_proper.txt	GO:0051173	33.0	0.000248344389644	433.0
484	positive regulation of transcription from RNA polymerase II promoter	CTK1_Salt_overestimated_proper.txt	GO:0045944	27.0	0.000385450614674	312.0
485	positive regulation of biological process	CTK1_Salt_overestimated_proper.txt	GO:0048518	43.0	0.000420630113374	682.0
486	positive regulation of macromolecule biosynthetic process	CTK1_Salt_overestimated_proper.txt	GO:0010557	31.0	0.000557737192474	403.0
487	positive regulation of biosynthetic process	CTK1_Salt_overestimated_proper.txt	GO:0009891	31.0	0.00150345455137	421.0
488	positive regulation of cellular biosynthetic process	CTK1_Salt_overestimated_proper.txt	GO:0031328	31.0	0.00150345455137	421.0
489	positive regulation of gene expression	CTK1_Salt_overestimated_proper.txt	GO:0010628	30.0	0.00153977965507	399.0
490	regulation of transcription from RNA polymerase II promoter	CTK1_Salt_overestimated_proper.txt	GO:0006357	33.0	0.00159320479493	468.0
491	chromatin organization	CTK1_Salt_overestimated_proper.txt	GO:0006325	27.0	0.00284813342595	344.0
492	regulation of cellular component organization	CTK1_Salt_overestimated_proper.txt	GO:0051128	31.0	0.00420483446416	441.0
493	mitotic cell cycle process	CTK1_Salt_overestimated_proper.txt	GO:1903047	27.0	0.0113446544797	369.0
494	DNA repair	CTK1_Salt_overestimated_proper.txt	GO:0006281	24.0	0.0126774729171	305.0
495	chromosome organization	CTK1_Salt_overestimated_proper.txt	GO:0051276	37.0	0.0163613827858	619.0
496	nucleobase-containing compound biosynthetic process	CTK1_Salt_overestimated_proper.txt	GO:0034654	52.0	0.0185441794306	1033.0
497	heterocycle biosynthetic process	CTK1_Salt_overestimated_proper.txt	GO:0018130	55.0	0.0188386731271	1121.0
498	mitotic cell cycle	CTK1_Salt_overestimated_proper.txt	GO:0000278	28.0	0.0218825886554	405.0
499	aromatic compound biosynthetic process	CTK1_Salt_overestimated_proper.txt	GO:0019438	54.0	0.0246096149153	1101.0
500	carbohydrate derivative biosynthetic process	SSN3_Menadione_overestimated_proper.txt	GO:1901137	38.0	1.25273591786e-05	242.0
501	glycoprotein biosynthetic process	SSN3_Menadione_overestimated_proper.txt	GO:0009101	20.0	4.23544231427e-05	81.0
502	glycoprotein metabolic process	SSN3_Menadione_overestimated_proper.txt	GO:0009100	20.0	8.31768874123e-05	84.0
503	protein glycosylation	SSN3_Menadione_overestimated_proper.txt	GO:0006486	19.0	0.000128755014826	78.0
504	macromolecule glycosylation	SSN3_Menadione_overestimated_proper.txt	GO:0043413	19.0	0.000128755014826	78.0
505	glycosylation	SSN3_Menadione_overestimated_proper.txt	GO:0070085	20.0	0.000157973919707	87.0
506	ncRNA metabolic process	SSN3_Menadione_overestimated_proper.txt	GO:0034660	61.0	0.00198517663336	584.0
507	ribosome biogenesis	SSN3_Menadione_overestimated_proper.txt	GO:0042254	53.0	0.00268653973839	482.0
508	ribonucleoprotein complex biogenesis	SSN3_Menadione_overestimated_proper.txt	GO:0022613	59.0	0.00664507685808	577.0
509	protein N-linked glycosylation	SSN3_Menadione_overestimated_proper.txt	GO:0006487	12.0	0.0489788864903	49.0
510	endosomal transport	TOR2_GlucoseDepletion_overestimated_proper.txt	GO:0016197	12.0	0.00104384105919	113.0
511	biological regulation	TOR2_GlucoseDepletion_overestimated_proper.txt	GO:0065007	56.0	0.00382156604422	2039.0
512	regulation of biological process	TOR2_GlucoseDepletion_overestimated_proper.txt	GO:0050789	49.0	0.00885475080135	1692.0
513	macromolecule localization	TOR2_GlucoseDepletion_overestimated_proper.txt	GO:0033036	32.0	0.0388840066373	914.0
514	iron chelate transport	SLT2_Heatshock_underestimated_proper.txt	GO:0015688	3.0	0.0073828058398	10.0
515	iron coordination entity transport	SLT2_Heatshock_underestimated_proper.txt	GO:1901678	3.0	0.0277854139838	15.0
516	protein deglutathionylation	KIN1_SDC_underestimated_proper.txt	GO:0080058	2.0	0.0213777346618	2.0
517	Golgi vesicle transport	TOR2_Azetidine_underestimated_proper.txt	GO:0048193	23.0	1.64179648149e-07	201.0
518	vesicle-mediated transport	TOR2_Azetidine_underestimated_proper.txt	GO:0016192	32.0	2.54783855053e-07	402.0
519	establishment of localization in cell	TOR2_Azetidine_underestimated_proper.txt	GO:0051649	43.0	2.68366815779e-07	699.0
520	establishment of protein localization	TOR2_Azetidine_underestimated_proper.txt	GO:0045184	40.0	4.04840281743e-07	621.0
521	protein transport	TOR2_Azetidine_underestimated_proper.txt	GO:0015031	39.0	5.81681485093e-07	600.0
522	protein localization	TOR2_Azetidine_underestimated_proper.txt	GO:0008104	43.0	3.64480615434e-06	757.0
523	intracellular transport	TOR2_Azetidine_underestimated_proper.txt	GO:0046907	39.0	5.88608251822e-06	648.0
524	macromolecule localization	TOR2_Azetidine_underestimated_proper.txt	GO:0033036	46.0	3.9789430561e-05	914.0
525	cellular localization	TOR2_Azetidine_underestimated_proper.txt	GO:0051641	45.0	5.88383703396e-05	892.0
526	endosomal transport	TOR2_Azetidine_underestimated_proper.txt	GO:0016197	14.0	0.000601387332099	113.0
527	cytosolic transport	TOR2_Azetidine_underestimated_proper.txt	GO:0016482	10.0	0.000930856935369	54.0
528	organic substance transport	TOR2_Azetidine_underestimated_proper.txt	GO:0071702	43.0	0.00205529420973	932.0
529	vesicle docking	TOR2_Azetidine_underestimated_proper.txt	GO:0048278	8.0	0.00238905832444	34.0
530	cellular protein localization	TOR2_Azetidine_underestimated_proper.txt	GO:0034613	31.0	0.0032106147886	559.0
531	post-Golgi vesicle-mediated transport	TOR2_Azetidine_underestimated_proper.txt	GO:0006892	11.0	0.00347315967551	77.0
532	vesicle docking involved in exocytosis	TOR2_Azetidine_underestimated_proper.txt	GO:0006904	6.0	0.00503500772644	17.0
533	intracellular protein transport	TOR2_Azetidine_underestimated_proper.txt	GO:0006886	25.0	0.00633167518079	402.0
534	cellular macromolecule localization	TOR2_Azetidine_underestimated_proper.txt	GO:0070727	31.0	0.00933321733831	587.0
535	membrane docking	TOR2_Azetidine_underestimated_proper.txt	GO:0022406	8.0	0.011051467953	41.0
536	vacuolar transport	TOR2_Azetidine_underestimated_proper.txt	GO:0007034	15.0	0.0336183229998	179.0
537	vesicle tethering	TOR2_Azetidine_underestimated_proper.txt	GO:0099022	5.0	0.0404449725877	14.0
538	oxidative phosphorylation	HOG1_GlucoseDepletion_underestimated_proper.txt	GO:0006119	12.0	1.90933616657e-09	39.0
539	ion transport	HOG1_GlucoseDepletion_underestimated_proper.txt	GO:0006811	29.0	1.11599794237e-08	410.0
540	respiratory electron transport chain	HOG1_GlucoseDepletion_underestimated_proper.txt	GO:0022904	12.0	1.298649626e-08	45.0
541	ATP synthesis coupled electron transport	HOG1_GlucoseDepletion_underestimated_proper.txt	GO:0042773	11.0	2.99635173079e-08	37.0
542	mitochondrial ATP synthesis coupled electron transport	HOG1_GlucoseDepletion_underestimated_proper.txt	GO:0042775	11.0	2.99635173079e-08	37.0
543	electron transport chain	HOG1_GlucoseDepletion_underestimated_proper.txt	GO:0022900	12.0	3.02419963304e-08	48.0
544	transmembrane transport	HOG1_GlucoseDepletion_underestimated_proper.txt	GO:0055085	30.0	6.23089679457e-08	471.0
545	cellular respiration	HOG1_GlucoseDepletion_underestimated_proper.txt	GO:0045333	15.0	7.19263820866e-07	111.0
546	ion transmembrane transport	HOG1_GlucoseDepletion_underestimated_proper.txt	GO:0034220	20.0	2.5049412642e-06	236.0
547	cation transport	HOG1_GlucoseDepletion_underestimated_proper.txt	GO:0006812	19.0	2.31418210896e-05	240.0
548	cation transmembrane transport	HOG1_GlucoseDepletion_underestimated_proper.txt	GO:0098655	15.0	9.76786182363e-05	157.0
549	mitochondrial electron transport, ubiquinol to cytochrome c	HOG1_GlucoseDepletion_underestimated_proper.txt	GO:0006122	6.0	0.000116061264975	13.0
550	energy derivation by oxidation of organic compounds	HOG1_GlucoseDepletion_underestimated_proper.txt	GO:0015980	15.0	0.000162893161943	163.0
551	single-organism transport	HOG1_GlucoseDepletion_underestimated_proper.txt	GO:0044765	31.0	0.000286793226915	706.0
552	ATP metabolic process	HOG1_GlucoseDepletion_underestimated_proper.txt	GO:0046034	12.0	0.000361986352945	104.0
553	generation of precursor metabolites and energy	HOG1_GlucoseDepletion_underestimated_proper.txt	GO:0006091	16.0	0.000486540855444	203.0
554	single-organism localization	HOG1_GlucoseDepletion_underestimated_proper.txt	GO:1902578	32.0	0.000541840926972	767.0
555	purine ribonucleoside triphosphate metabolic process	HOG1_GlucoseDepletion_underestimated_proper.txt	GO:0009205	12.0	0.000614514673765	109.0
556	purine nucleoside triphosphate metabolic process	HOG1_GlucoseDepletion_underestimated_proper.txt	GO:0009144	12.0	0.000753348181066	111.0
557	ribonucleoside triphosphate metabolic process	HOG1_GlucoseDepletion_underestimated_proper.txt	GO:0009199	12.0	0.000919556339697	113.0
558	inorganic ion transmembrane transport	HOG1_GlucoseDepletion_underestimated_proper.txt	GO:0098660	13.0	0.00094841930574	136.0
559	purine ribonucleoside metabolic process	HOG1_GlucoseDepletion_underestimated_proper.txt	GO:0046128	13.0	0.00103414224713	137.0
560	purine nucleoside metabolic process	HOG1_GlucoseDepletion_underestimated_proper.txt	GO:0042278	13.0	0.00112675603538	138.0
561	lipid metabolic process	HOG1_GlucoseDepletion_underestimated_proper.txt	GO:0006629	20.0	0.00144765876332	342.0
562	nucleoside triphosphate metabolic process	HOG1_GlucoseDepletion_underestimated_proper.txt	GO:0009141	12.0	0.00196043188126	121.0
563	purine ribonucleotide metabolic process	HOG1_GlucoseDepletion_underestimated_proper.txt	GO:0009150	13.0	0.00236320191702	147.0
564	purine nucleotide metabolic process	HOG1_GlucoseDepletion_underestimated_proper.txt	GO:0006163	13.0	0.00322771579854	151.0
565	monovalent inorganic cation transport	HOG1_GlucoseDepletion_underestimated_proper.txt	GO:0015672	12.0	0.00332891218913	127.0
566	purine nucleoside monophosphate metabolic process	HOG1_GlucoseDepletion_underestimated_proper.txt	GO:0009126	12.0	0.00394505712049	129.0
567	purine ribonucleoside monophosphate metabolic process	HOG1_GlucoseDepletion_underestimated_proper.txt	GO:0009167	12.0	0.00394505712049	129.0
568	ribonucleoside metabolic process	HOG1_GlucoseDepletion_underestimated_proper.txt	GO:0009119	13.0	0.00436240804619	155.0
569	hydrogen transport	HOG1_GlucoseDepletion_underestimated_proper.txt	GO:0006818	11.0	0.00628391863124	111.0
570	hydrogen ion transmembrane transport	HOG1_GlucoseDepletion_underestimated_proper.txt	GO:1902600	9.0	0.00696101563776	70.0
571	ribonucleotide metabolic process	HOG1_GlucoseDepletion_underestimated_proper.txt	GO:0009259	13.0	0.00723287334376	162.0
572	response to drug	HOG1_GlucoseDepletion_underestimated_proper.txt	GO:0042493	7.0	0.00767806795648	37.0
573	oxidation-reduction process	HOG1_GlucoseDepletion_underestimated_proper.txt	GO:0055114	22.0	0.00912769954946	456.0
574	inorganic cation transmembrane transport	HOG1_GlucoseDepletion_underestimated_proper.txt	GO:0098662	11.0	0.00976803367748	116.0
575	nucleoside metabolic process	HOG1_GlucoseDepletion_underestimated_proper.txt	GO:0009116	13.0	0.0102082623288	167.0
576	purine-containing compound metabolic process	HOG1_GlucoseDepletion_underestimated_proper.txt	GO:0072521	13.0	0.0116763856725	169.0
577	glycosyl compound metabolic process	HOG1_GlucoseDepletion_underestimated_proper.txt	GO:1901657	13.0	0.0142328505265	172.0
578	ribonucleoside monophosphate metabolic process	HOG1_GlucoseDepletion_underestimated_proper.txt	GO:0009161	12.0	0.0159460173793	147.0
579	single-organism process	HOG1_GlucoseDepletion_underestimated_proper.txt	GO:0044699	75.0	0.0165729393548	3416.0
580	nucleoside monophosphate metabolic process	HOG1_GlucoseDepletion_underestimated_proper.txt	GO:0009123	12.0	0.0197188412791	150.0
581	drug transport	HOG1_GlucoseDepletion_underestimated_proper.txt	GO:0015893	5.0	0.0258644510265	17.0
582	ribose phosphate metabolic process	HOG1_GlucoseDepletion_underestimated_proper.txt	GO:0019693	13.0	0.026715060831	182.0
583	single-organism metabolic process	HOG1_GlucoseDepletion_underestimated_proper.txt	GO:0044710	43.0	0.0384914228227	1470.0
584	proton transport	HOG1_GlucoseDepletion_underestimated_proper.txt	GO:0015992	10.0	0.0433998511055	110.0
585	cellular lipid metabolic process	HOG1_GlucoseDepletion_underestimated_proper.txt	GO:0044255	17.0	0.0444957630393	318.0
586	cellular iron ion homeostasis	KIN1_Heatshock_underestimated_proper.txt	GO:0006879	6.0	0.000310520535731	47.0
587	iron ion homeostasis	KIN1_Heatshock_underestimated_proper.txt	GO:0055072	6.0	0.00138884825714	60.0
588	cellular transition metal ion homeostasis	KIN1_Heatshock_underestimated_proper.txt	GO:0046916	6.0	0.00491396681119	74.0
589	iron assimilation by chelation and transport	KIN1_Heatshock_underestimated_proper.txt	GO:0033214	3.0	0.00988849298545	6.0
590	transition metal ion homeostasis	KIN1_Heatshock_underestimated_proper.txt	GO:0055076	6.0	0.0137420777376	88.0
591	cellular metal ion homeostasis	KIN1_Heatshock_underestimated_proper.txt	GO:0006875	6.0	0.0274278122871	99.0
592	iron assimilation	KIN1_Heatshock_underestimated_proper.txt	GO:0033212	3.0	0.0411153483451	9.0
593	mitochondrial translation	SNF1_GlucoseDepletion_overestimated_proper.txt	GO:0032543	51.0	1.69578500805e-30	171.0
594	mitochondrion organization	SNF1_GlucoseDepletion_overestimated_proper.txt	GO:0007005	37.0	1.67833724783e-08	280.0
595	mitochondrial RNA metabolic process	SNF1_GlucoseDepletion_overestimated_proper.txt	GO:0000959	11.0	1.85452863733e-05	30.0
596	peptide metabolic process	SNF1_GlucoseDepletion_overestimated_proper.txt	GO:0006518	60.0	7.45733910474e-05	803.0
597	protein targeting to mitochondrion	SNF1_GlucoseDepletion_overestimated_proper.txt	GO:0006626	14.0	0.000196570505865	63.0
598	translation	SNF1_GlucoseDepletion_overestimated_proper.txt	GO:0006412	57.0	0.000219725088225	765.0
599	peptide biosynthetic process	SNF1_GlucoseDepletion_overestimated_proper.txt	GO:0043043	57.0	0.000265136690542	769.0
600	protein localization to mitochondrion	SNF1_GlucoseDepletion_overestimated_proper.txt	GO:0070585	14.0	0.000809403377177	70.0
601	establishment of protein localization to mitochondrion	SNF1_GlucoseDepletion_overestimated_proper.txt	GO:0072655	14.0	0.000809403377177	70.0
602	cellular amide metabolic process	SNF1_GlucoseDepletion_overestimated_proper.txt	GO:0043603	61.0	0.000884249611719	879.0
603	amide biosynthetic process	SNF1_GlucoseDepletion_overestimated_proper.txt	GO:0043604	58.0	0.00104008097582	820.0
604	organonitrogen compound biosynthetic process	SNF1_GlucoseDepletion_overestimated_proper.txt	GO:1901566	72.0	0.00465655973735	1164.0
605	organonitrogen compound metabolic process	SNF1_GlucoseDepletion_overestimated_proper.txt	GO:1901564	82.0	0.00612551756533	1404.0
606	mitochondrial transmembrane transport	SNF1_GlucoseDepletion_overestimated_proper.txt	GO:1990542	12.0	0.00643003607288	60.0
607	mitochondrial transport	SNF1_GlucoseDepletion_overestimated_proper.txt	GO:0006839	16.0	0.00770025138014	108.0
608	nucleosome organization	YGK3_Menadione_overestimated_proper.txt	GO:0034728	6.0	0.00670852560781	75.0
609	protein-DNA complex subunit organization	YGK3_Menadione_overestimated_proper.txt	GO:0071824	8.0	0.00998320280004	185.0
610	chromatin organization	YGK3_Menadione_overestimated_proper.txt	GO:0006325	10.0	0.0147277010792	344.0
611	sulfate assimilation	HOG1_GlucoseDepletion_overestimated_proper.txt	GO:0000103	7.0	4.52214072595e-06	10.0
612	serine family amino acid biosynthetic process	HOG1_GlucoseDepletion_overestimated_proper.txt	GO:0009070	10.0	5.47954474429e-06	28.0
613	single-organism metabolic process	HOG1_GlucoseDepletion_overestimated_proper.txt	GO:0044710	70.0	0.000103812079158	1470.0
614	cysteine biosynthetic process	HOG1_GlucoseDepletion_overestimated_proper.txt	GO:0019344	7.0	0.000118261350652	14.0
615	methionine biosynthetic process	HOG1_GlucoseDepletion_overestimated_proper.txt	GO:0009086	10.0	0.000206840223094	39.0
616	sulfur amino acid metabolic process	HOG1_GlucoseDepletion_overestimated_proper.txt	GO:0000096	11.0	0.000238326407071	50.0
617	serine family amino acid metabolic process	HOG1_GlucoseDepletion_overestimated_proper.txt	GO:0009069	10.0	0.00026951505252	40.0
618	sulfur amino acid biosynthetic process	HOG1_GlucoseDepletion_overestimated_proper.txt	GO:0000097	10.0	0.00034841577588	41.0
619	hydrogen sulfide metabolic process	HOG1_GlucoseDepletion_overestimated_proper.txt	GO:0070813	5.0	0.00036595167997	6.0
620	hydrogen sulfide biosynthetic process	HOG1_GlucoseDepletion_overestimated_proper.txt	GO:0070814	5.0	0.00036595167997	6.0
621	aspartate family amino acid biosynthetic process	HOG1_GlucoseDepletion_overestimated_proper.txt	GO:0009067	11.0	0.000680960560368	55.0
622	methionine metabolic process	HOG1_GlucoseDepletion_overestimated_proper.txt	GO:0006555	10.0	0.000719985023332	44.0
623	cysteine metabolic process	HOG1_GlucoseDepletion_overestimated_proper.txt	GO:0006534	7.0	0.00100165589261	18.0
624	organic acid biosynthetic process	HOG1_GlucoseDepletion_overestimated_proper.txt	GO:0016053	20.0	0.00109220708921	200.0
625	carboxylic acid biosynthetic process	HOG1_GlucoseDepletion_overestimated_proper.txt	GO:0046394	20.0	0.00109220708921	200.0
626	sulfate reduction	HOG1_GlucoseDepletion_overestimated_proper.txt	GO:0019419	4.0	0.00242493658142	4.0
627	alpha-amino acid biosynthetic process	HOG1_GlucoseDepletion_overestimated_proper.txt	GO:1901607	15.0	0.00489872514774	127.0
628	sulfur compound metabolic process	HOG1_GlucoseDepletion_overestimated_proper.txt	GO:0006790	16.0	0.00580234447963	146.0
629	single-organism biosynthetic process	HOG1_GlucoseDepletion_overestimated_proper.txt	GO:0044711	40.0	0.00652841268386	706.0
630	cellular amino acid biosynthetic process	HOG1_GlucoseDepletion_overestimated_proper.txt	GO:0008652	15.0	0.0107624724432	135.0
631	aspartate family amino acid metabolic process	HOG1_GlucoseDepletion_overestimated_proper.txt	GO:0009066	11.0	0.0116783443018	72.0
632	small molecule biosynthetic process	HOG1_GlucoseDepletion_overestimated_proper.txt	GO:0044283	24.0	0.0305645100601	336.0
633	positive regulation of lipid biosynthetic process	HOG1_GlucoseDepletion_overestimated_proper.txt	GO:0046889	6.0	0.0323355493482	19.0
634	cellular amino acid metabolic process	PBS2_GlucoseDepletion_underestimated_proper.txt	GO:0006520	32.0	9.60979119011e-15	255.0
635	cellular amino acid biosynthetic process	PBS2_GlucoseDepletion_underestimated_proper.txt	GO:0008652	24.0	1.02048744296e-13	135.0
636	single-organism biosynthetic process	PBS2_GlucoseDepletion_underestimated_proper.txt	GO:0044711	48.0	5.23358268577e-13	706.0
637	alpha-amino acid biosynthetic process	PBS2_GlucoseDepletion_underestimated_proper.txt	GO:1901607	22.0	4.6849934777e-12	127.0
638	small molecule biosynthetic process	PBS2_GlucoseDepletion_underestimated_proper.txt	GO:0044283	33.0	4.71489363782e-12	336.0
639	organic acid biosynthetic process	PBS2_GlucoseDepletion_underestimated_proper.txt	GO:0016053	26.0	1.16090396797e-11	200.0
640	carboxylic acid biosynthetic process	PBS2_GlucoseDepletion_underestimated_proper.txt	GO:0046394	26.0	1.16090396797e-11	200.0
641	carboxylic acid metabolic process	PBS2_GlucoseDepletion_underestimated_proper.txt	GO:0019752	35.0	2.14511722407e-10	433.0
642	alpha-amino acid metabolic process	PBS2_GlucoseDepletion_underestimated_proper.txt	GO:1901605	24.0	2.82188119142e-10	189.0
643	oxoacid metabolic process	PBS2_GlucoseDepletion_underestimated_proper.txt	GO:0043436	35.0	6.90835222632e-10	450.0
644	organic acid metabolic process	PBS2_GlucoseDepletion_underestimated_proper.txt	GO:0006082	35.0	7.38619417888e-10	451.0
645	small molecule metabolic process	PBS2_GlucoseDepletion_underestimated_proper.txt	GO:0044281	45.0	1.4489816457e-08	810.0
646	single-organism metabolic process	PBS2_GlucoseDepletion_underestimated_proper.txt	GO:0044710	61.0	7.94092958314e-08	1470.0
647	organonitrogen compound metabolic process	PBS2_GlucoseDepletion_underestimated_proper.txt	GO:1901564	54.0	6.80161331572e-05	1404.0
648	organonitrogen compound biosynthetic process	PBS2_GlucoseDepletion_underestimated_proper.txt	GO:1901566	47.0	0.000271889661049	1164.0
649	aromatic amino acid family biosynthetic process	PBS2_GlucoseDepletion_underestimated_proper.txt	GO:0009073	6.0	0.000977022196275	15.0
650	organic substance biosynthetic process	PBS2_GlucoseDepletion_underestimated_proper.txt	GO:1901576	73.0	0.00151385084301	2446.0
651	biosynthetic process	PBS2_GlucoseDepletion_underestimated_proper.txt	GO:0009058	73.0	0.00285907495168	2479.0
652	cellular biosynthetic process	PBS2_GlucoseDepletion_underestimated_proper.txt	GO:0044249	72.0	0.00288108758533	2427.0
653	aspartate family amino acid metabolic process	PBS2_GlucoseDepletion_underestimated_proper.txt	GO:0009066	10.0	0.00454160782911	72.0
654	single-organism process	PBS2_GlucoseDepletion_underestimated_proper.txt	GO:0044699	87.0	0.037110827502	3416.0
655	DNA conformation change	IRE1_Salt_overestimated_proper.txt	GO:0071103	7.0	0.0133017901842	119.0
656	DNA-dependent DNA replication	IRE1_Salt_overestimated_proper.txt	GO:0006261	7.0	0.037584334104	139.0
657	synapsis	IRE1_Salt_overestimated_proper.txt	GO:0007129	4.0	0.0440922451436	25.0
658	organic hydroxy compound biosynthetic process	YPK3_Menadione_underestimated_proper.txt	GO:1901617	7.0	0.0448310492893	83.0
659	DNA replication initiation	TPK123_Tunicamycin_underestimated_proper.txt	GO:0006270	6.0	0.00299426637682	57.0
660	nuclear DNA replication	TPK123_Tunicamycin_underestimated_proper.txt	GO:0033260	5.0	0.0137994772565	41.0
661	mitotic cell cycle process	TPK123_Tunicamycin_underestimated_proper.txt	GO:1903047	11.0	0.0143531816495	369.0
662	cell cycle DNA replication	TPK123_Tunicamycin_underestimated_proper.txt	GO:0044786	5.0	0.0155962837739	42.0
663	double-strand break repair via homologous recombination	TPK123_Tunicamycin_underestimated_proper.txt	GO:0000724	6.0	0.0180661519943	77.0
664	pre-replicative complex assembly involved in nuclear cell cycle DNA replication	TPK123_Tunicamycin_underestimated_proper.txt	GO:0006267	4.0	0.0196149680195	20.0
665	pre-replicative complex assembly	TPK123_Tunicamycin_underestimated_proper.txt	GO:0036388	4.0	0.0196149680195	20.0
666	pre-replicative complex assembly involved in cell cycle DNA replication	TPK123_Tunicamycin_underestimated_proper.txt	GO:1902299	4.0	0.0196149680195	20.0
667	recombinational repair	TPK123_Tunicamycin_underestimated_proper.txt	GO:0000725	6.0	0.0301063096329	84.0
668	mitotic cell cycle	TPK123_Tunicamycin_underestimated_proper.txt	GO:0000278	11.0	0.0355672030011	405.0
669	alpha-amino acid metabolic process	YPK1_Rapamycin_overestimated_proper.txt	GO:1901605	19.0	6.06840894563e-06	189.0
670	small molecule biosynthetic process	YPK1_Rapamycin_overestimated_proper.txt	GO:0044283	24.0	3.39305617563e-05	336.0
671	alpha-amino acid biosynthetic process	YPK1_Rapamycin_overestimated_proper.txt	GO:1901607	15.0	4.49217895025e-05	127.0
672	carboxylic acid metabolic process	YPK1_Rapamycin_overestimated_proper.txt	GO:0019752	27.0	6.11243398871e-05	433.0
673	cellular amino acid biosynthetic process	YPK1_Rapamycin_overestimated_proper.txt	GO:0008652	15.0	0.000104719558526	135.0
674	oxoacid metabolic process	YPK1_Rapamycin_overestimated_proper.txt	GO:0043436	27.0	0.000139637826775	450.0
675	organic acid metabolic process	YPK1_Rapamycin_overestimated_proper.txt	GO:0006082	27.0	0.000146372570922	451.0
676	cellular amino acid metabolic process	YPK1_Rapamycin_overestimated_proper.txt	GO:0006520	20.0	0.000161108547239	255.0
677	aspartate family amino acid metabolic process	YPK1_Rapamycin_overestimated_proper.txt	GO:0009066	10.0	0.00350426338311	72.0
678	organic acid biosynthetic process	YPK1_Rapamycin_overestimated_proper.txt	GO:0016053	16.0	0.00350981995904	200.0
679	carboxylic acid biosynthetic process	YPK1_Rapamycin_overestimated_proper.txt	GO:0046394	16.0	0.00350981995904	200.0
680	methionine metabolic process	YPK1_Rapamycin_overestimated_proper.txt	GO:0006555	8.0	0.00589818437763	44.0
681	sulfur amino acid metabolic process	YPK1_Rapamycin_overestimated_proper.txt	GO:0000096	8.0	0.0162856861313	50.0
682	serine family amino acid metabolic process	YPK1_Rapamycin_overestimated_proper.txt	GO:0009069	7.0	0.0374347003876	40.0
683	cellular amide catabolic process	FUS3_Heatshock_underestimated_proper.txt	GO:0043605	7.0	2.58354623538e-05	9.0
684	allantoin metabolic process	FUS3_Heatshock_underestimated_proper.txt	GO:0000255	6.0	0.000133849569368	7.0
685	allantoin catabolic process	FUS3_Heatshock_underestimated_proper.txt	GO:0000256	6.0	0.000133849569368	7.0
686	methionine biosynthetic process	YPK1_YPD_underestimated_proper.txt	GO:0009086	9.0	2.28379127869e-05	39.0
687	sulfur amino acid biosynthetic process	YPK1_YPD_underestimated_proper.txt	GO:0000097	9.0	3.68215414756e-05	41.0
688	methionine metabolic process	YPK1_YPD_underestimated_proper.txt	GO:0006555	9.0	7.17665310242e-05	44.0
689	sulfur amino acid metabolic process	YPK1_YPD_underestimated_proper.txt	GO:0000096	9.0	0.000235343167364	50.0
690	aspartate family amino acid biosynthetic process	YPK1_YPD_underestimated_proper.txt	GO:0009067	9.0	0.000561134158499	55.0
691	sulfur compound metabolic process	YPK1_YPD_underestimated_proper.txt	GO:0006790	13.0	0.00127698086464	146.0
692	aspartate family amino acid metabolic process	YPK1_YPD_underestimated_proper.txt	GO:0009066	9.0	0.00607676681129	72.0
693	cysteine biosynthetic process	YPK1_YPD_underestimated_proper.txt	GO:0019344	5.0	0.00699078645424	14.0
694	serine family amino acid metabolic process	YPK1_YPD_underestimated_proper.txt	GO:0009069	7.0	0.00990309897342	40.0
695	alpha-amino acid biosynthetic process	YPK1_YPD_underestimated_proper.txt	GO:1901607	11.0	0.015357453508	127.0
696	serine family amino acid biosynthetic process	YPK1_YPD_underestimated_proper.txt	GO:0009070	6.0	0.0161319194013	28.0
697	sulfur compound biosynthetic process	YPK1_YPD_underestimated_proper.txt	GO:0044272	9.0	0.0226154064402	84.0
698	cellular amino acid biosynthetic process	YPK1_YPD_underestimated_proper.txt	GO:0008652	11.0	0.0279568082588	135.0
699	cysteine metabolic process	YPK1_YPD_underestimated_proper.txt	GO:0006534	5.0	0.028476898147	18.0
700	cellular amino acid metabolic process	TPK123_Salt_underestimated_proper.txt	GO:0006520	22.0	0.000255927095932	255.0
701	single-organism metabolic process	TPK123_Salt_underestimated_proper.txt	GO:0044710	60.0	0.00175446798017	1470.0
702	aspartate family amino acid metabolic process	TPK123_Salt_underestimated_proper.txt	GO:0009066	11.0	0.00279442780004	72.0
703	threonine metabolic process	TPK123_Salt_underestimated_proper.txt	GO:0006566	5.0	0.0035318365657	9.0
704	carboxylic acid metabolic process	TPK123_Salt_underestimated_proper.txt	GO:0019752	27.0	0.0055445473056	433.0
705	tRNA aminoacylation for protein translation	TPK123_Salt_underestimated_proper.txt	GO:0006418	8.0	0.00858802217237	38.0
706	oxoacid metabolic process	TPK123_Salt_underestimated_proper.txt	GO:0043436	27.0	0.011765140935	450.0
707	organic acid metabolic process	TPK123_Salt_underestimated_proper.txt	GO:0006082	27.0	0.0122791056811	451.0
708	amino acid activation	TPK123_Salt_underestimated_proper.txt	GO:0043038	8.0	0.015831140124	41.0
709	tRNA aminoacylation	TPK123_Salt_underestimated_proper.txt	GO:0043039	8.0	0.015831140124	41.0
710	threonine biosynthetic process	TPK123_Salt_underestimated_proper.txt	GO:0009088	4.0	0.0196957869926	6.0
711	single-organism process	TPK123_Salt_underestimated_proper.txt	GO:0044699	102.0	0.0261973910421	3416.0
712	protein localization to organelle	CDC15_Azetidine_overestimated_proper.txt	GO:0033365	25.0	0.00197744553243	413.0
713	cellular macromolecule localization	CDC15_Azetidine_overestimated_proper.txt	GO:0070727	30.0	0.00427935074444	587.0
714	establishment of protein localization	CDC15_Azetidine_overestimated_proper.txt	GO:0045184	31.0	0.00444228765823	621.0
715	single-organism membrane organization	CDC15_Azetidine_overestimated_proper.txt	GO:0044802	20.0	0.00493646098466	291.0
716	protein transport	CDC15_Azetidine_overestimated_proper.txt	GO:0015031	30.0	0.00683297422949	600.0
717	establishment of protein localization to organelle	CDC15_Azetidine_overestimated_proper.txt	GO:0072594	21.0	0.0104018843353	333.0
718	membrane organization	CDC15_Azetidine_overestimated_proper.txt	GO:0061024	20.0	0.0140131906924	311.0
719	cellular protein localization	CDC15_Azetidine_overestimated_proper.txt	GO:0034613	28.0	0.0165159634099	559.0
720	protein localization to membrane	CDC15_Azetidine_overestimated_proper.txt	GO:0072657	12.0	0.022786971221	121.0
721	protein targeting	CDC15_Azetidine_overestimated_proper.txt	GO:0006605	20.0	0.0302629803829	327.0
722	establishment of protein localization to membrane	CDC15_Azetidine_overestimated_proper.txt	GO:0090150	11.0	0.0412773652811	107.0
723	protein folding	CTK1_Menadione_overestimated_proper.txt	GO:0006457	21.0	9.90186598152e-10	110.0
724	protein refolding	CTK1_Menadione_overestimated_proper.txt	GO:0042026	10.0	6.88272932979e-09	17.0
725	nicotinamide nucleotide metabolic process	CTK1_Menadione_overestimated_proper.txt	GO:0046496	16.0	1.12952729417e-06	85.0
726	pyridine-containing compound metabolic process	CTK1_Menadione_overestimated_proper.txt	GO:0072524	17.0	1.14956819746e-06	98.0
727	pyridine nucleotide metabolic process	CTK1_Menadione_overestimated_proper.txt	GO:0019362	16.0	1.35756786642e-06	86.0
728	oxidoreduction coenzyme metabolic process	CTK1_Menadione_overestimated_proper.txt	GO:0006733	17.0	1.88413432919e-06	101.0
729	glucose 6-phosphate metabolic process	CTK1_Menadione_overestimated_proper.txt	GO:0051156	10.0	3.65615334795e-06	28.0
730	pentose-phosphate shunt	CTK1_Menadione_overestimated_proper.txt	GO:0006098	8.0	7.84696794783e-06	16.0
731	glyceraldehyde-3-phosphate metabolic process	CTK1_Menadione_overestimated_proper.txt	GO:0019682	8.0	7.84696794783e-06	16.0
732	NADP metabolic process	CTK1_Menadione_overestimated_proper.txt	GO:0006739	9.0	1.63741850526e-05	24.0
733	cofactor metabolic process	CTK1_Menadione_overestimated_proper.txt	GO:0051186	22.0	0.000309982966839	232.0
734	response to abiotic stimulus	CTK1_Menadione_overestimated_proper.txt	GO:0009628	19.0	0.000771448904222	185.0
735	pentose-phosphate shunt, oxidative branch	CTK1_Menadione_overestimated_proper.txt	GO:0009051	5.0	0.00102033579197	7.0
736	cellular aldehyde metabolic process	CTK1_Menadione_overestimated_proper.txt	GO:0006081	10.0	0.00261804438557	52.0
737	glycolytic process	CTK1_Menadione_overestimated_proper.txt	GO:0006096	8.0	0.00587068862897	33.0
738	ATP generation from ADP	CTK1_Menadione_overestimated_proper.txt	GO:0006757	8.0	0.00587068862897	33.0
739	nucleoside diphosphate phosphorylation	CTK1_Menadione_overestimated_proper.txt	GO:0006165	8.0	0.00953070734358	35.0
740	proteasome assembly	CTK1_Menadione_overestimated_proper.txt	GO:0043248	8.0	0.011991810022	36.0
741	response to oxidative stress	CTK1_Menadione_overestimated_proper.txt	GO:0006979	14.0	0.0121869927894	124.0
742	coenzyme metabolic process	CTK1_Menadione_overestimated_proper.txt	GO:0006732	17.0	0.0175718057615	185.0
743	pyruvate metabolic process	CTK1_Menadione_overestimated_proper.txt	GO:0006090	9.0	0.0251392823532	52.0
744	cellular response to oxidative stress	CTK1_Menadione_overestimated_proper.txt	GO:0034599	13.0	0.0281278825485	115.0
745	ADP metabolic process	CTK1_Menadione_overestimated_proper.txt	GO:0046031	8.0	0.0339883423237	41.0
746	purine nucleoside diphosphate metabolic process	CTK1_Menadione_overestimated_proper.txt	GO:0009135	8.0	0.0410888360399	42.0
747	purine ribonucleoside diphosphate metabolic process	CTK1_Menadione_overestimated_proper.txt	GO:0009179	8.0	0.0410888360399	42.0
748	ribonucleoside diphosphate metabolic process	CTK1_Menadione_overestimated_proper.txt	GO:0009185	8.0	0.0410888360399	42.0
749	nucleotide phosphorylation	CTK1_Menadione_overestimated_proper.txt	GO:0046939	8.0	0.0410888360399	42.0
750	ribosome biogenesis	YPK3_Heatshock_underestimated_proper.txt	GO:0042254	65.0	2.5839686499e-19	482.0
751	ribonucleoprotein complex biogenesis	YPK3_Heatshock_underestimated_proper.txt	GO:0022613	70.0	1.81606088036e-18	577.0
752	ncRNA metabolic process	YPK3_Heatshock_underestimated_proper.txt	GO:0034660	69.0	1.92381515261e-17	584.0
753	ncRNA processing	YPK3_Heatshock_underestimated_proper.txt	GO:0034470	59.0	1.68937840459e-15	469.0
754	rRNA processing	YPK3_Heatshock_underestimated_proper.txt	GO:0006364	50.0	1.42305956112e-14	355.0
755	rRNA metabolic process	YPK3_Heatshock_underestimated_proper.txt	GO:0016072	51.0	1.99704618646e-14	372.0
756	RNA processing	YPK3_Heatshock_underestimated_proper.txt	GO:0006396	65.0	3.36176780185e-12	652.0
757	maturation of SSU-rRNA from tricistronic rRNA transcript (SSU-rRNA, 5.8S rRNA, LSU-rRNA)	YPK3_Heatshock_underestimated_proper.txt	GO:0000462	22.0	6.43792404037e-08	108.0
758	maturation of 5.8S rRNA from tricistronic rRNA transcript (SSU-rRNA, 5.8S rRNA, LSU-rRNA)	YPK3_Heatshock_underestimated_proper.txt	GO:0000466	20.0	6.91889786329e-08	88.0
759	maturation of 5.8S rRNA	YPK3_Heatshock_underestimated_proper.txt	GO:0000460	20.0	8.64989886181e-08	89.0
760	ribosomal small subunit biogenesis	YPK3_Heatshock_underestimated_proper.txt	GO:0042274	25.0	1.57200679065e-07	147.0
761	maturation of SSU-rRNA	YPK3_Heatshock_underestimated_proper.txt	GO:0030490	22.0	4.85117602711e-07	119.0
762	cellular component biogenesis	YPK3_Heatshock_underestimated_proper.txt	GO:0044085	85.0	1.64463077685e-06	1299.0
763	cleavage involved in rRNA processing	YPK3_Heatshock_underestimated_proper.txt	GO:0000469	17.0	9.62390101302e-06	81.0
764	gene expression	YPK3_Heatshock_underestimated_proper.txt	GO:0010467	115.0	1.02899660111e-05	2099.0
765	RNA metabolic process	YPK3_Heatshock_underestimated_proper.txt	GO:0016070	93.0	1.40628702758e-05	1545.0
766	ribosomal large subunit biogenesis	YPK3_Heatshock_underestimated_proper.txt	GO:0042273	20.0	2.84350775671e-05	121.0
767	rRNA 5'-end processing	YPK3_Heatshock_underestimated_proper.txt	GO:0000967	11.0	0.000117280455883	36.0
768	ncRNA 5'-end processing	YPK3_Heatshock_underestimated_proper.txt	GO:0034471	11.0	0.000117280455883	36.0
769	RNA 5'-end processing	YPK3_Heatshock_underestimated_proper.txt	GO:0000966	11.0	0.000161730658624	37.0
770	endonucleolytic cleavage in ITS1 to separate SSU-rRNA from 5.8S rRNA and LSU-rRNA from tricistronic rRNA transcript (SSU-rRNA, 5.8S rRNA, LSU-rRNA)	YPK3_Heatshock_underestimated_proper.txt	GO:0000447	12.0	0.000191425075305	46.0
771	nucleic acid metabolic process	YPK3_Heatshock_underestimated_proper.txt	GO:0090304	100.0	0.000194188885386	1798.0
772	endonucleolytic cleavage to generate mature 5'-end of SSU-rRNA from (SSU-rRNA, 5.8S rRNA, LSU-rRNA)	YPK3_Heatshock_underestimated_proper.txt	GO:0000472	10.0	0.00106839948742	35.0
773	maturation of LSU-rRNA from tricistronic rRNA transcript (SSU-rRNA, 5.8S rRNA, LSU-rRNA)	YPK3_Heatshock_underestimated_proper.txt	GO:0000463	11.0	0.00116632958762	44.0
774	maturation of LSU-rRNA	YPK3_Heatshock_underestimated_proper.txt	GO:0000470	12.0	0.00162959785573	55.0
775	endonucleolytic cleavage involved in rRNA processing	YPK3_Heatshock_underestimated_proper.txt	GO:0000478	12.0	0.00301654145478	58.0
776	endonucleolytic cleavage of tricistronic rRNA transcript (SSU-rRNA, 5.8S rRNA, LSU-rRNA)	YPK3_Heatshock_underestimated_proper.txt	GO:0000479	12.0	0.00301654145478	58.0
777	ribosomal subunit export from nucleus	YPK3_Heatshock_underestimated_proper.txt	GO:0000054	11.0	0.00303258544915	48.0
778	establishment of ribosome localization	YPK3_Heatshock_underestimated_proper.txt	GO:0033753	11.0	0.00303258544915	48.0
779	ribosome localization	YPK3_Heatshock_underestimated_proper.txt	GO:0033750	11.0	0.0037894754196	49.0
780	nucleobase-containing compound metabolic process	YPK3_Heatshock_underestimated_proper.txt	GO:0006139	105.0	0.0054099776382	2043.0
781	RNA phosphodiester bond hydrolysis	YPK3_Heatshock_underestimated_proper.txt	GO:0090501	22.0	0.00552158620739	195.0
782	nucleocytoplasmic transport	YPK3_Heatshock_underestimated_proper.txt	GO:0006913	21.0	0.00681382088219	182.0
783	endonucleolytic cleavage in 5'-ETS of tricistronic rRNA transcript (SSU-rRNA, 5.8S rRNA, LSU-rRNA)	YPK3_Heatshock_underestimated_proper.txt	GO:0000480	9.0	0.0068684466072	33.0
784	nucleic acid phosphodiester bond hydrolysis	YPK3_Heatshock_underestimated_proper.txt	GO:0090305	27.0	0.00725245040863	280.0
785	nuclear transport	YPK3_Heatshock_underestimated_proper.txt	GO:0051169	21.0	0.0074564199116	183.0
786	cellular component organization or biogenesis	YPK3_Heatshock_underestimated_proper.txt	GO:0071840	120.0	0.00762779272557	2466.0
787	tRNA metabolic process	YPK3_Heatshock_underestimated_proper.txt	GO:0006399	22.0	0.01094711254	203.0
788	cellular aromatic compound metabolic process	YPK3_Heatshock_underestimated_proper.txt	GO:0006725	106.0	0.0231176815321	2126.0
789	cytoplasmic translation	YPK3_Heatshock_underestimated_proper.txt	GO:0002181	20.0	0.0313277063778	184.0
790	heterocycle metabolic process	YPK3_Heatshock_underestimated_proper.txt	GO:0046483	106.0	0.0334624416703	2141.0
791	oxidation-reduction process	SCH9_Menadione_underestimated_proper.txt	GO:0055114	176.0	1.91548017199e-20	456.0
792	cellular protein catabolic process	SCH9_Menadione_underestimated_proper.txt	GO:0044257	116.0	1.39836989185e-16	270.0
793	proteolysis involved in cellular protein catabolic process	SCH9_Menadione_underestimated_proper.txt	GO:0051603	109.0	5.51337856777e-16	250.0
794	single-organism metabolic process	SCH9_Menadione_underestimated_proper.txt	GO:0044710	401.0	1.6008192853e-15	1470.0
795	proteasomal protein catabolic process	SCH9_Menadione_underestimated_proper.txt	GO:0010498	78.0	6.92783758087e-15	156.0
796	proteasome-mediated ubiquitin-dependent protein catabolic process	SCH9_Menadione_underestimated_proper.txt	GO:0043161	77.0	7.10562002892e-15	153.0
797	protein catabolic process	SCH9_Menadione_underestimated_proper.txt	GO:0030163	118.0	1.25993746319e-14	290.0
798	ubiquitin-dependent protein catabolic process	SCH9_Menadione_underestimated_proper.txt	GO:0006511	100.0	1.78795921692e-14	229.0
799	modification-dependent protein catabolic process	SCH9_Menadione_underestimated_proper.txt	GO:0019941	100.0	1.78795921692e-14	229.0
800	cellular catabolic process	SCH9_Menadione_underestimated_proper.txt	GO:0044248	202.0	2.20585075565e-12	636.0
801	response to oxidative stress	SCH9_Menadione_underestimated_proper.txt	GO:0006979	63.0	6.01181681477e-12	124.0
802	catabolic process	SCH9_Menadione_underestimated_proper.txt	GO:0009056	225.0	1.01666168941e-11	741.0
803	modification-dependent macromolecule catabolic process	SCH9_Menadione_underestimated_proper.txt	GO:0043632	101.0	1.06433953474e-11	251.0
804	organic substance catabolic process	SCH9_Menadione_underestimated_proper.txt	GO:1901575	221.0	6.58042945671e-11	735.0
805	cellular response to oxidative stress	SCH9_Menadione_underestimated_proper.txt	GO:0034599	58.0	1.29542771178e-10	115.0
806	response to chemical	SCH9_Menadione_underestimated_proper.txt	GO:0042221	171.0	1.33857533564e-10	530.0
807	cellular macromolecule catabolic process	SCH9_Menadione_underestimated_proper.txt	GO:0044265	139.0	1.14772991699e-09	412.0
808	macromolecule catabolic process	SCH9_Menadione_underestimated_proper.txt	GO:0009057	149.0	2.18847828839e-09	455.0
809	proteolysis	SCH9_Menadione_underestimated_proper.txt	GO:0006508	139.0	7.5553422511e-09	421.0
810	sulfur compound metabolic process	SCH9_Menadione_underestimated_proper.txt	GO:0006790	63.0	7.43369320014e-08	146.0
811	proteasomal ubiquitin-independent protein catabolic process	SCH9_Menadione_underestimated_proper.txt	GO:0010499	15.0	8.34876272169e-08	15.0
812	cellular response to chemical stimulus	SCH9_Menadione_underestimated_proper.txt	GO:0070887	126.0	2.32842007053e-07	386.0
813	energy derivation by oxidation of organic compounds	SCH9_Menadione_underestimated_proper.txt	GO:0015980	67.0	2.33852037755e-07	163.0
814	small molecule metabolic process	SCH9_Menadione_underestimated_proper.txt	GO:0044281	225.0	3.44990894477e-07	810.0
815	response to inorganic substance	SCH9_Menadione_underestimated_proper.txt	GO:0010035	36.0	3.63013854827e-07	65.0
816	cysteine biosynthetic process	SCH9_Menadione_underestimated_proper.txt	GO:0019344	14.0	4.39807600745e-07	14.0
817	cellular response to stress	SCH9_Menadione_underestimated_proper.txt	GO:0033554	204.0	5.80327216029e-07	721.0
818	response to stress	SCH9_Menadione_underestimated_proper.txt	GO:0006950	225.0	9.77882688483e-07	818.0
819	generation of precursor metabolites and energy	SCH9_Menadione_underestimated_proper.txt	GO:0006091	76.0	2.34633451755e-06	203.0
820	response to abiotic stimulus	SCH9_Menadione_underestimated_proper.txt	GO:0009628	70.0	6.90895008658e-06	185.0
821	single-organism process	SCH9_Menadione_underestimated_proper.txt	GO:0044699	739.0	1.52149427257e-05	3416.0
822	mitochondrion organization	SCH9_Menadione_underestimated_proper.txt	GO:0007005	94.0	1.6978463657e-05	280.0
823	biological regulation	SCH9_Menadione_underestimated_proper.txt	GO:0065007	474.0	2.24451997189e-05	2039.0
824	cellular oxidant detoxification	SCH9_Menadione_underestimated_proper.txt	GO:0098869	23.0	2.36539730879e-05	36.0
825	detoxification	SCH9_Menadione_underestimated_proper.txt	GO:0098754	23.0	5.1257570967e-05	37.0
826	cellular detoxification	SCH9_Menadione_underestimated_proper.txt	GO:1990748	23.0	5.1257570967e-05	37.0
827	response to stimulus	SCH9_Menadione_underestimated_proper.txt	GO:0050896	308.0	9.55346265609e-05	1244.0
828	protein folding	SCH9_Menadione_underestimated_proper.txt	GO:0006457	46.0	0.000146673632277	110.0
829	cofactor metabolic process	SCH9_Menadione_underestimated_proper.txt	GO:0051186	79.0	0.000162336503109	232.0
830	sulfur amino acid metabolic process	SCH9_Menadione_underestimated_proper.txt	GO:0000096	27.0	0.00018683794348	50.0
831	NADP metabolic process	SCH9_Menadione_underestimated_proper.txt	GO:0006739	17.0	0.000260987933169	24.0
832	cellular response to stimulus	SCH9_Menadione_underestimated_proper.txt	GO:0051716	271.0	0.00039303396745	1084.0
833	protein complex assembly	SCH9_Menadione_underestimated_proper.txt	GO:0006461	100.0	0.000420730889907	321.0
834	glutathione metabolic process	SCH9_Menadione_underestimated_proper.txt	GO:0006749	15.0	0.000485366451834	20.0
835	cysteine metabolic process	SCH9_Menadione_underestimated_proper.txt	GO:0006534	14.0	0.000615814664354	18.0
836	protein complex biogenesis	SCH9_Menadione_underestimated_proper.txt	GO:0070271	102.0	0.000672445992071	332.0
837	protein ubiquitination	SCH9_Menadione_underestimated_proper.txt	GO:0016567	53.0	0.000717818985026	140.0
838	positive regulation of proteolysis	SCH9_Menadione_underestimated_proper.txt	GO:0045862	13.0	0.000722810671404	16.0
839	sulfur amino acid biosynthetic process	SCH9_Menadione_underestimated_proper.txt	GO:0000097	23.0	0.000765792686618	41.0
840	regulation of protein catabolic process	SCH9_Menadione_underestimated_proper.txt	GO:0042176	16.0	0.000978973507653	23.0
841	serine family amino acid biosynthetic process	SCH9_Menadione_underestimated_proper.txt	GO:0009070	18.0	0.00103236108567	28.0
842	proteasome assembly	SCH9_Menadione_underestimated_proper.txt	GO:0043248	21.0	0.0010849893976	36.0
843	phosphorus metabolic process	SCH9_Menadione_underestimated_proper.txt	GO:0006793	213.0	0.00115692521822	825.0
844	response to temperature stimulus	SCH9_Menadione_underestimated_proper.txt	GO:0009266	35.0	0.00125461643782	79.0
845	cellular protein complex assembly	SCH9_Menadione_underestimated_proper.txt	GO:0043623	87.0	0.00145631358216	275.0
846	response to toxic substance	SCH9_Menadione_underestimated_proper.txt	GO:0009636	24.0	0.00147634849683	45.0
847	single-organism cellular process	SCH9_Menadione_underestimated_proper.txt	GO:0044763	637.0	0.00170013947464	2937.0
848	regulation of proteolysis	SCH9_Menadione_underestimated_proper.txt	GO:0030162	20.0	0.00175825973023	34.0
849	aerobic respiration	SCH9_Menadione_underestimated_proper.txt	GO:0009060	35.0	0.00182498283346	80.0
850	actin cortical patch organization	SCH9_Menadione_underestimated_proper.txt	GO:0044396	14.0	0.0019217166414	19.0
851	energy reserve metabolic process	SCH9_Menadione_underestimated_proper.txt	GO:0006112	21.0	0.0020560534284	37.0
852	oxidoreduction coenzyme metabolic process	SCH9_Menadione_underestimated_proper.txt	GO:0006733	41.0	0.00219836172066	101.0
853	nucleotide metabolic process	SCH9_Menadione_underestimated_proper.txt	GO:0009117	79.0	0.00221496062958	245.0
854	response to heat	SCH9_Menadione_underestimated_proper.txt	GO:0009408	33.0	0.00229729250262	74.0
855	phosphate-containing compound metabolic process	SCH9_Menadione_underestimated_proper.txt	GO:0006796	205.0	0.00230659567317	795.0
856	cellular aldehyde metabolic process	SCH9_Menadione_underestimated_proper.txt	GO:0006081	26.0	0.00251378948737	52.0
857	protein refolding	SCH9_Menadione_underestimated_proper.txt	GO:0042026	13.0	0.00252288350409	17.0
858	glycogen metabolic process	SCH9_Menadione_underestimated_proper.txt	GO:0005977	20.0	0.00336259609352	35.0
859	methionine metabolic process	SCH9_Menadione_underestimated_proper.txt	GO:0006555	23.0	0.00419540213151	44.0
860	nucleoside phosphate metabolic process	SCH9_Menadione_underestimated_proper.txt	GO:0006753	79.0	0.00462320798346	249.0
861	regulation of molecular function	SCH9_Menadione_underestimated_proper.txt	GO:0065009	120.0	0.00530091807319	422.0
862	cellular respiration	SCH9_Menadione_underestimated_proper.txt	GO:0045333	43.0	0.00530187452299	111.0
863	protein complex subunit organization	SCH9_Menadione_underestimated_proper.txt	GO:0071822	108.0	0.0065600139446	372.0
864	methionine biosynthetic process	SCH9_Menadione_underestimated_proper.txt	GO:0009086	21.0	0.00669509874733	39.0
865	regulation of proteolysis involved in cellular protein catabolic process	SCH9_Menadione_underestimated_proper.txt	GO:1903050	12.0	0.0101891273419	16.0
866	regulation of cellular protein catabolic process	SCH9_Menadione_underestimated_proper.txt	GO:1903362	12.0	0.0101891273419	16.0
867	ribose phosphate metabolic process	SCH9_Menadione_underestimated_proper.txt	GO:0019693	61.0	0.0115051298536	182.0
868	pyridine nucleotide metabolic process	SCH9_Menadione_underestimated_proper.txt	GO:0019362	35.0	0.0143360506173	86.0
869	positive regulation of proteolysis involved in cellular protein catabolic process	SCH9_Menadione_underestimated_proper.txt	GO:1903052	9.0	0.0145414492055	10.0
870	positive regulation of cellular protein catabolic process	SCH9_Menadione_underestimated_proper.txt	GO:1903364	9.0	0.0145414492055	10.0
871	trehalose metabolic process	SCH9_Menadione_underestimated_proper.txt	GO:0005991	10.0	0.0150801667664	12.0
872	regulation of cellular process	SCH9_Menadione_underestimated_proper.txt	GO:0050794	375.0	0.0167145883715	1634.0
873	cellular homeostasis	SCH9_Menadione_underestimated_proper.txt	GO:0019725	69.0	0.0176657883475	216.0
874	response to oxygen-containing compound	SCH9_Menadione_underestimated_proper.txt	GO:1901700	35.0	0.0196259815071	87.0
875	protein modification by small protein conjugation	SCH9_Menadione_underestimated_proper.txt	GO:0032446	58.0	0.0202457141147	173.0
876	regulation of catalytic activity	SCH9_Menadione_underestimated_proper.txt	GO:0050790	113.0	0.0207334904583	402.0
877	regulation of biological process	SCH9_Menadione_underestimated_proper.txt	GO:0050789	386.0	0.0211485586828	1692.0
878	regulation of primary metabolic process	SCH9_Menadione_underestimated_proper.txt	GO:0080090	273.0	0.0271661683993	1143.0
879	nicotinamide nucleotide metabolic process	SCH9_Menadione_underestimated_proper.txt	GO:0046496	34.0	0.0313096423681	85.0
880	mitochondrial respiratory chain complex assembly	SCH9_Menadione_underestimated_proper.txt	GO:0033108	20.0	0.032349630454	39.0
881	carboxylic acid metabolic process	SCH9_Menadione_underestimated_proper.txt	GO:0019752	119.0	0.0376887723491	433.0
882	protein modification by small protein conjugation or removal	SCH9_Menadione_underestimated_proper.txt	GO:0070647	67.0	0.0440320746343	213.0
883	regulation of metabolic process	SCH9_Menadione_underestimated_proper.txt	GO:0019222	279.0	0.046636319604	1179.0
884	pentose-phosphate shunt, oxidative branch	SCH9_Menadione_underestimated_proper.txt	GO:0009051	7.0	0.0481770411555	7.0
885	protein folding	STE11_Rapamycin_overestimated_proper.txt	GO:0006457	5.0	7.62784766378e-05	110.0
886	protein refolding	STE11_Rapamycin_overestimated_proper.txt	GO:0042026	3.0	0.00230887293564	17.0
887	tRNA import into nucleus	STE11_Rapamycin_overestimated_proper.txt	GO:0035719	2.0	0.0145633461688	3.0
888	protein targeting to ER	STE11_Rapamycin_overestimated_proper.txt	GO:0045047	3.0	0.035838374203	41.0
889	establishment of protein localization to endoplasmic reticulum	STE11_Rapamycin_overestimated_proper.txt	GO:0072599	3.0	0.0385724884941	42.0
890	negative regulation of cell aging	STE11_Rapamycin_overestimated_proper.txt	GO:0090344	2.0	0.0484712644769	5.0
891	mitochondrial translation	SLT2_Menadione_underestimated_proper.txt	GO:0032543	24.0	1.25707898629e-10	171.0
892	mitochondrial translational initiation	SLT2_Menadione_underestimated_proper.txt	GO:0070124	5.0	0.000901899747255	8.0
893	protein folding	PKC1_Menadione_underestimated_proper.txt	GO:0006457	11.0	0.00152565399862	110.0
894	protein refolding	PKC1_Menadione_underestimated_proper.txt	GO:0042026	5.0	0.0137438108787	17.0
895	response to stress	PKC1_Menadione_underestimated_proper.txt	GO:0006950	28.0	0.0143288997349	818.0
896	response to oxidative stress	PKC1_Menadione_underestimated_proper.txt	GO:0006979	10.0	0.0397512614822	124.0
897	actin cortical patch organization	RIM15_Azetidine_overestimated_proper.txt	GO:0044396	8.0	3.43293877434e-06	19.0
898	actin filament organization	RIM15_Azetidine_overestimated_proper.txt	GO:0007015	13.0	5.75593806472e-06	78.0
899	actin cortical patch assembly	RIM15_Azetidine_overestimated_proper.txt	GO:0000147	7.0	3.10965029275e-05	16.0
900	actin cytoskeleton organization	RIM15_Azetidine_overestimated_proper.txt	GO:0030036	15.0	4.88587154517e-05	129.0
901	actin filament-based process	RIM15_Azetidine_overestimated_proper.txt	GO:0030029	15.0	8.27833001303e-05	134.0
902	regulation of Arp2/3 complex-mediated actin nucleation	RIM15_Azetidine_overestimated_proper.txt	GO:0034315	6.0	0.000151068053055	12.0
903	regulation of actin nucleation	RIM15_Azetidine_overestimated_proper.txt	GO:0051125	6.0	0.000151068053055	12.0
904	actin filament polymerization	RIM15_Azetidine_overestimated_proper.txt	GO:0030041	8.0	0.000167113064587	29.0
905	regulation of actin filament polymerization	RIM15_Azetidine_overestimated_proper.txt	GO:0030833	8.0	0.000167113064587	29.0
906	positive regulation of actin nucleation	RIM15_Azetidine_overestimated_proper.txt	GO:0051127	5.0	0.000207342540217	7.0
907	positive regulation of Arp2/3 complex-mediated actin nucleation	RIM15_Azetidine_overestimated_proper.txt	GO:2000601	5.0	0.000207342540217	7.0
908	regulation of actin polymerization or depolymerization	RIM15_Azetidine_overestimated_proper.txt	GO:0008064	8.0	0.000224256912747	30.0
909	regulation of actin filament length	RIM15_Azetidine_overestimated_proper.txt	GO:0030832	8.0	0.000224256912747	30.0
910	positive regulation of actin filament polymerization	RIM15_Azetidine_overestimated_proper.txt	GO:0030838	7.0	0.000292358060658	21.0
911	actin nucleation	RIM15_Azetidine_overestimated_proper.txt	GO:0045010	7.0	0.000292358060658	21.0
912	actin polymerization or depolymerization	RIM15_Azetidine_overestimated_proper.txt	GO:0008154	8.0	0.000507770869541	33.0
913	supramolecular fiber organization	RIM15_Azetidine_overestimated_proper.txt	GO:0097435	13.0	0.000651367560596	114.0
914	regulation of cellular component size	RIM15_Azetidine_overestimated_proper.txt	GO:0032535	10.0	0.00118942688045	65.0
915	regulation of anatomical structure size	RIM15_Azetidine_overestimated_proper.txt	GO:0090066	10.0	0.00118942688045	65.0
916	regulation of actin cytoskeleton organization	RIM15_Azetidine_overestimated_proper.txt	GO:0032956	9.0	0.00206343896265	53.0
917	regulation of actin filament-based process	RIM15_Azetidine_overestimated_proper.txt	GO:0032970	9.0	0.00206343896265	53.0
918	endocytosis	RIM15_Azetidine_overestimated_proper.txt	GO:0006897	13.0	0.00213440972583	126.0
919	positive regulation of protein complex assembly	RIM15_Azetidine_overestimated_proper.txt	GO:0031334	9.0	0.00243709955577	54.0
920	cortical cytoskeleton organization	RIM15_Azetidine_overestimated_proper.txt	GO:0030865	7.0	0.00267192346451	28.0
921	cortical actin cytoskeleton organization	RIM15_Azetidine_overestimated_proper.txt	GO:0030866	7.0	0.00267192346451	28.0
922	regulation of supramolecular fiber organization	RIM15_Azetidine_overestimated_proper.txt	GO:1902903	9.0	0.00336525933612	56.0
923	Arp2/3 complex-mediated actin nucleation	RIM15_Azetidine_overestimated_proper.txt	GO:0034314	6.0	0.00397745467046	19.0
924	regulation of protein polymerization	RIM15_Azetidine_overestimated_proper.txt	GO:0032271	8.0	0.00454211001637	43.0
925	positive regulation of cellular component biogenesis	RIM15_Azetidine_overestimated_proper.txt	GO:0044089	10.0	0.00471479393399	75.0
926	regulation of cellular component biogenesis	RIM15_Azetidine_overestimated_proper.txt	GO:0044087	14.0	0.00486928261306	158.0
927	positive regulation of protein polymerization	RIM15_Azetidine_overestimated_proper.txt	GO:0032273	7.0	0.00892457973804	33.0
928	membrane invagination	RIM15_Azetidine_overestimated_proper.txt	GO:0010324	11.0	0.0138153327243	104.0
929	positive regulation of supramolecular fiber organization	RIM15_Azetidine_overestimated_proper.txt	GO:1902905	7.0	0.0415890001663	41.0
930	regulation of protein complex assembly	RIM15_Azetidine_overestimated_proper.txt	GO:0043254	10.0	0.0422534906688	95.0
931	ribosome biogenesis	KIN1_Menadione_underestimated_proper.txt	GO:0042254	158.0	8.96086182404e-79	482.0
932	ncRNA metabolic process	KIN1_Menadione_underestimated_proper.txt	GO:0034660	166.0	8.75976617561e-73	584.0
933	ribonucleoprotein complex biogenesis	KIN1_Menadione_underestimated_proper.txt	GO:0022613	162.0	1.1902562087e-69	577.0
934	ncRNA processing	KIN1_Menadione_underestimated_proper.txt	GO:0034470	141.0	7.5932692388e-63	469.0
935	rRNA processing	KIN1_Menadione_underestimated_proper.txt	GO:0006364	119.0	3.97113433298e-57	355.0
936	rRNA metabolic process	KIN1_Menadione_underestimated_proper.txt	GO:0016072	120.0	1.51762508275e-55	372.0
937	RNA processing	KIN1_Menadione_underestimated_proper.txt	GO:0006396	145.0	3.84037511685e-46	652.0
938	ribosomal small subunit biogenesis	KIN1_Menadione_underestimated_proper.txt	GO:0042274	65.0	4.06085275782e-37	147.0
939	ribosomal large subunit biogenesis	KIN1_Menadione_underestimated_proper.txt	GO:0042273	57.0	6.18172356244e-34	121.0
940	maturation of SSU-rRNA from tricistronic rRNA transcript (SSU-rRNA, 5.8S rRNA, LSU-rRNA)	KIN1_Menadione_underestimated_proper.txt	GO:0000462	51.0	4.90140625645e-30	108.0
941	maturation of SSU-rRNA	KIN1_Menadione_underestimated_proper.txt	GO:0030490	53.0	1.00454726653e-29	119.0
942	cellular component biogenesis	KIN1_Menadione_underestimated_proper.txt	GO:0044085	177.0	3.91719266913e-27	1299.0
943	RNA metabolic process	KIN1_Menadione_underestimated_proper.txt	GO:0016070	195.0	1.39066768675e-26	1545.0
944	gene expression	KIN1_Menadione_underestimated_proper.txt	GO:0010467	223.0	6.22132648675e-21	2099.0
945	maturation of 5.8S rRNA	KIN1_Menadione_underestimated_proper.txt	GO:0000460	39.0	1.09408027145e-20	89.0
946	maturation of 5.8S rRNA from tricistronic rRNA transcript (SSU-rRNA, 5.8S rRNA, LSU-rRNA)	KIN1_Menadione_underestimated_proper.txt	GO:0000466	38.0	8.49495063989e-20	88.0
947	nucleic acid metabolic process	KIN1_Menadione_underestimated_proper.txt	GO:0090304	198.0	9.80025504705e-19	1798.0
948	nucleobase-containing compound metabolic process	KIN1_Menadione_underestimated_proper.txt	GO:0006139	211.0	5.12918517192e-17	2043.0
949	maturation of LSU-rRNA	KIN1_Menadione_underestimated_proper.txt	GO:0000470	28.0	2.74544494476e-16	55.0
950	cellular aromatic compound metabolic process	KIN1_Menadione_underestimated_proper.txt	GO:0006725	212.0	4.80670762331e-15	2126.0
951	cleavage involved in rRNA processing	KIN1_Menadione_underestimated_proper.txt	GO:0000469	32.0	8.15339067639e-15	81.0
952	heterocycle metabolic process	KIN1_Menadione_underestimated_proper.txt	GO:0046483	212.0	1.25707912456e-14	2141.0
953	organic cyclic compound metabolic process	KIN1_Menadione_underestimated_proper.txt	GO:1901360	216.0	1.31904753448e-14	2203.0
954	maturation of LSU-rRNA from tricistronic rRNA transcript (SSU-rRNA, 5.8S rRNA, LSU-rRNA)	KIN1_Menadione_underestimated_proper.txt	GO:0000463	24.0	1.64242413551e-14	44.0
955	endonucleolytic cleavage in ITS1 to separate SSU-rRNA from 5.8S rRNA and LSU-rRNA from tricistronic rRNA transcript (SSU-rRNA, 5.8S rRNA, LSU-rRNA)	KIN1_Menadione_underestimated_proper.txt	GO:0000447	24.0	6.55470180699e-14	46.0
956	rRNA 5'-end processing	KIN1_Menadione_underestimated_proper.txt	GO:0000967	21.0	3.41432121571e-13	36.0
957	ncRNA 5'-end processing	KIN1_Menadione_underestimated_proper.txt	GO:0034471	21.0	3.41432121571e-13	36.0
958	endonucleolytic cleavage involved in rRNA processing	KIN1_Menadione_underestimated_proper.txt	GO:0000478	26.0	3.52352462863e-13	58.0
959	endonucleolytic cleavage of tricistronic rRNA transcript (SSU-rRNA, 5.8S rRNA, LSU-rRNA)	KIN1_Menadione_underestimated_proper.txt	GO:0000479	26.0	3.52352462863e-13	58.0
960	RNA 5'-end processing	KIN1_Menadione_underestimated_proper.txt	GO:0000966	21.0	7.44583774168e-13	37.0
961	endonucleolytic cleavage to generate mature 5'-end of SSU-rRNA from (SSU-rRNA, 5.8S rRNA, LSU-rRNA)	KIN1_Menadione_underestimated_proper.txt	GO:0000472	20.0	3.36819759465e-12	35.0
962	endonucleolytic cleavage in 5'-ETS of tricistronic rRNA transcript (SSU-rRNA, 5.8S rRNA, LSU-rRNA)	KIN1_Menadione_underestimated_proper.txt	GO:0000480	19.0	1.51884236732e-11	33.0
963	cellular component organization or biogenesis	KIN1_Menadione_underestimated_proper.txt	GO:0071840	225.0	1.72780780139e-11	2466.0
964	tRNA metabolic process	KIN1_Menadione_underestimated_proper.txt	GO:0006399	45.0	8.58897627039e-11	203.0
965	nitrogen compound metabolic process	KIN1_Menadione_underestimated_proper.txt	GO:0006807	254.0	1.51193124015e-10	2987.0
966	ribosome assembly	KIN1_Menadione_underestimated_proper.txt	GO:0042255	27.0	2.97263323715e-10	79.0
967	cellular nitrogen compound metabolic process	KIN1_Menadione_underestimated_proper.txt	GO:0034641	240.0	1.2362419607e-09	2792.0
968	cellular macromolecule metabolic process	KIN1_Menadione_underestimated_proper.txt	GO:0044260	255.0	2.33707596604e-08	3107.0
969	macromolecule metabolic process	KIN1_Menadione_underestimated_proper.txt	GO:0043170	261.0	3.67361478871e-08	3221.0
970	RNA phosphodiester bond hydrolysis	KIN1_Menadione_underestimated_proper.txt	GO:0090501	38.0	6.93180631285e-07	195.0
971	ribonucleoprotein complex subunit organization	KIN1_Menadione_underestimated_proper.txt	GO:0071826	38.0	1.75867896545e-06	201.0
972	ribonucleoprotein complex assembly	KIN1_Menadione_underestimated_proper.txt	GO:0022618	36.0	4.28279193217e-06	189.0
973	RNA modification	KIN1_Menadione_underestimated_proper.txt	GO:0009451	35.0	5.70925564948e-06	182.0
974	ribosomal large subunit assembly	KIN1_Menadione_underestimated_proper.txt	GO:0000027	16.0	7.3034025219e-06	42.0
975	RNA phosphodiester bond hydrolysis, endonucleolytic	KIN1_Menadione_underestimated_proper.txt	GO:0090502	30.0	9.22375473129e-06	142.0
976	rRNA-containing ribonucleoprotein complex export from nucleus	KIN1_Menadione_underestimated_proper.txt	GO:0071428	19.0	1.99635493346e-05	63.0
977	ncRNA transcription	KIN1_Menadione_underestimated_proper.txt	GO:0098781	18.0	2.27416509493e-05	57.0
978	primary metabolic process	KIN1_Menadione_underestimated_proper.txt	GO:0044238	289.0	2.63796706898e-05	3879.0
979	RNA secondary structure unwinding	KIN1_Menadione_underestimated_proper.txt	GO:0010501	13.0	4.10200023262e-05	30.0
980	ribonucleoprotein complex export from nucleus	KIN1_Menadione_underestimated_proper.txt	GO:0071426	27.0	6.43873444022e-05	128.0
981	ribosomal subunit export from nucleus	KIN1_Menadione_underestimated_proper.txt	GO:0000054	16.0	6.98495864143e-05	48.0
982	establishment of ribosome localization	KIN1_Menadione_underestimated_proper.txt	GO:0033753	16.0	6.98495864143e-05	48.0
983	ribonucleoprotein complex localization	KIN1_Menadione_underestimated_proper.txt	GO:0071166	27.0	9.14877650555e-05	130.0
984	ribosome localization	KIN1_Menadione_underestimated_proper.txt	GO:0033750	16.0	9.78424355339e-05	49.0
985	cytoplasmic translation	KIN1_Menadione_underestimated_proper.txt	GO:0002181	33.0	0.000108952819068	184.0
986	organelle assembly	KIN1_Menadione_underestimated_proper.txt	GO:0070925	32.0	0.000111305736616	175.0
987	cellular metabolic process	KIN1_Menadione_underestimated_proper.txt	GO:0044237	292.0	0.000147909266343	3978.0
988	nuclear export	KIN1_Menadione_underestimated_proper.txt	GO:0051168	27.0	0.00025059908355	136.0
989	tRNA processing	KIN1_Menadione_underestimated_proper.txt	GO:0008033	26.0	0.000274732114678	128.0
990	nucleic acid phosphodiester bond hydrolysis	KIN1_Menadione_underestimated_proper.txt	GO:0090305	42.0	0.000282986782137	280.0
991	nucleocytoplasmic transport	KIN1_Menadione_underestimated_proper.txt	GO:0006913	32.0	0.000294657445012	182.0
992	nuclear transport	KIN1_Menadione_underestimated_proper.txt	GO:0051169	32.0	0.000336985528391	183.0
993	organic substance metabolic process	KIN1_Menadione_underestimated_proper.txt	GO:0071704	293.0	0.000883632604809	4043.0
994	tRNA modification	KIN1_Menadione_underestimated_proper.txt	GO:0006400	19.0	0.000914168453888	78.0
995	metabolic process	KIN1_Menadione_underestimated_proper.txt	GO:0008152	301.0	0.00109425971369	4200.0
996	transcription from RNA polymerase I promoter	KIN1_Menadione_underestimated_proper.txt	GO:0006360	16.0	0.0143259168036	68.0
997	RNA methylation	KIN1_Menadione_underestimated_proper.txt	GO:0001510	17.0	0.0443641666689	82.0
998	tRNA transcription from RNA polymerase III promoter	KIN1_Menadione_underestimated_proper.txt	GO:0042797	8.0	0.0450687467163	19.0
999	assembly of large subunit precursor of preribosome	KIN1_Menadione_underestimated_proper.txt	GO:1902626	6.0	0.0495277537472	10.0
1000	protein refolding	IRE1_Menadione_overestimated_proper.txt	GO:0042026	10.0	6.9111052481e-10	17.0
1001	protein folding	IRE1_Menadione_overestimated_proper.txt	GO:0006457	19.0	1.55620833704e-09	110.0
1002	response to abiotic stimulus	IRE1_Menadione_overestimated_proper.txt	GO:0009628	15.0	0.0196316081542	185.0
1003	protein transport	RIM15_SDC_underestimated_proper.txt	GO:0015031	50.0	1.4898308806e-05	600.0
1004	establishment of protein localization	RIM15_SDC_underestimated_proper.txt	GO:0045184	51.0	1.64258255531e-05	621.0
1005	organic substance transport	RIM15_SDC_underestimated_proper.txt	GO:0071702	66.0	1.98766451424e-05	932.0
1006	macromolecule localization	RIM15_SDC_underestimated_proper.txt	GO:0033036	65.0	2.32645969831e-05	914.0
1007	biological regulation	RIM15_SDC_underestimated_proper.txt	GO:0065007	110.0	0.000105201766069	2039.0
1008	regulation of biological process	RIM15_SDC_underestimated_proper.txt	GO:0050789	96.0	0.000169703077013	1692.0
1009	protein localization	RIM15_SDC_underestimated_proper.txt	GO:0008104	55.0	0.000280700683036	757.0
1010	regulation of cellular process	RIM15_SDC_underestimated_proper.txt	GO:0050794	91.0	0.00144005466636	1634.0
1011	cell communication	RIM15_SDC_underestimated_proper.txt	GO:0007154	38.0	0.00396454937623	470.0
1012	intracellular signal transduction	RIM15_SDC_underestimated_proper.txt	GO:0035556	24.0	0.00788624627309	231.0
1013	transport	RIM15_SDC_underestimated_proper.txt	GO:0006810	77.0	0.0162905639404	1368.0
1014	vesicle-mediated transport	RIM15_SDC_underestimated_proper.txt	GO:0016192	33.0	0.0172263595132	402.0
1015	signal transduction	RIM15_SDC_underestimated_proper.txt	GO:0007165	30.0	0.0190145851291	348.0
1016	signaling	RIM15_SDC_underestimated_proper.txt	GO:0023052	30.0	0.0190145851291	348.0
1017	single organism signaling	RIM15_SDC_underestimated_proper.txt	GO:0044700	30.0	0.0190145851291	348.0
1018	establishment of localization	RIM15_SDC_underestimated_proper.txt	GO:0051234	79.0	0.0194070403981	1423.0
1019	cellular response to stimulus	RIM15_SDC_underestimated_proper.txt	GO:0051716	64.0	0.036764027264	1084.0
1020	alpha-amino acid biosynthetic process	TPK123_Heatshock_overestimated_proper.txt	GO:1901607	11.0	0.00293591581679	127.0
1021	cellular amino acid metabolic process	TPK123_Heatshock_overestimated_proper.txt	GO:0006520	15.0	0.00345930862306	255.0
1022	cellular amino acid biosynthetic process	TPK123_Heatshock_overestimated_proper.txt	GO:0008652	11.0	0.00543676657245	135.0
1023	carboxylic acid metabolic process	TPK123_Heatshock_overestimated_proper.txt	GO:0019752	18.0	0.0359171689249	433.0
1024	organic acid biosynthetic process	TPK123_Heatshock_overestimated_proper.txt	GO:0016053	12.0	0.0430429418274	200.0
1025	carboxylic acid biosynthetic process	TPK123_Heatshock_overestimated_proper.txt	GO:0046394	12.0	0.0430429418274	200.0
1026	single-organism process	HOG1_Salt_overestimated_proper.txt	GO:0044699	166.0	7.30269146586e-10	3416.0
1027	single-organism metabolic process	HOG1_Salt_overestimated_proper.txt	GO:0044710	96.0	1.36369194155e-08	1470.0
1028	oxidation-reduction process	HOG1_Salt_overestimated_proper.txt	GO:0055114	44.0	1.01086411254e-06	456.0
1029	small molecule metabolic process	HOG1_Salt_overestimated_proper.txt	GO:0044281	60.0	1.31621637073e-05	810.0
1030	respiratory electron transport chain	HOG1_Salt_overestimated_proper.txt	GO:0022904	11.0	0.00128905521873	45.0
1031	electron transport chain	HOG1_Salt_overestimated_proper.txt	GO:0022900	11.0	0.00261762536425	48.0
1032	nucleotide metabolic process	HOG1_Salt_overestimated_proper.txt	GO:0009117	25.0	0.00493810928781	245.0
1033	nucleoside phosphate metabolic process	HOG1_Salt_overestimated_proper.txt	GO:0006753	25.0	0.00668993364049	249.0
1034	cation transport	HOG1_Salt_overestimated_proper.txt	GO:0006812	24.0	0.0119494935554	240.0
1035	mitochondrial electron transport, ubiquinol to cytochrome c	HOG1_Salt_overestimated_proper.txt	GO:0006122	6.0	0.01203653289	13.0
1036	ATP synthesis coupled electron transport	HOG1_Salt_overestimated_proper.txt	GO:0042773	9.0	0.0173750273606	37.0
1037	mitochondrial ATP synthesis coupled electron transport	HOG1_Salt_overestimated_proper.txt	GO:0042775	9.0	0.0173750273606	37.0
1038	organic hydroxy compound metabolic process	HOG1_Salt_overestimated_proper.txt	GO:1901615	17.0	0.0223619743504	137.0
1039	oxidative phosphorylation	HOG1_Salt_overestimated_proper.txt	GO:0006119	9.0	0.0278451617975	39.0
1040	nucleobase-containing small molecule metabolic process	HOG1_Salt_overestimated_proper.txt	GO:0055086	25.0	0.0314329816067	271.0
1041	actin cytoskeleton organization	HOG1_Salt_overestimated_proper.txt	GO:0030036	16.0	0.0435715941011	129.0
1042	single-organism cellular process	HOG1_Salt_overestimated_proper.txt	GO:0044763	132.0	0.0465594789062	2937.0
1043	single-organism metabolic process	SCH9_YPD_overestimated_proper.txt	GO:0044710	86.0	1.94675038584e-13	1470.0
1044	generation of precursor metabolites and energy	SCH9_YPD_overestimated_proper.txt	GO:0006091	30.0	1.26275004883e-11	203.0
1045	carbohydrate metabolic process	SCH9_YPD_overestimated_proper.txt	GO:0005975	36.0	4.52345662308e-11	313.0
1046	small molecule metabolic process	SCH9_YPD_overestimated_proper.txt	GO:0044281	58.0	1.43194828742e-10	810.0
1047	oxidation-reduction process	SCH9_YPD_overestimated_proper.txt	GO:0055114	42.0	4.47579910201e-10	456.0
1048	single-organism carbohydrate metabolic process	SCH9_YPD_overestimated_proper.txt	GO:0044723	32.0	4.7054958803e-10	265.0
1049	energy derivation by oxidation of organic compounds	SCH9_YPD_overestimated_proper.txt	GO:0015980	23.0	8.89333893265e-08	163.0
1050	trehalose metabolic process	SCH9_YPD_overestimated_proper.txt	GO:0005991	8.0	4.10667877644e-07	12.0
1051	energy reserve metabolic process	SCH9_YPD_overestimated_proper.txt	GO:0006112	11.0	6.33725168107e-06	37.0
1052	glycogen biosynthetic process	SCH9_YPD_overestimated_proper.txt	GO:0005978	9.0	8.31168517123e-06	22.0
1053	trehalose biosynthetic process	SCH9_YPD_overestimated_proper.txt	GO:0005992	6.0	1.00222160397e-05	7.0
1054	monosaccharide metabolic process	SCH9_YPD_overestimated_proper.txt	GO:0005996	16.0	1.7980637785e-05	99.0
1055	oxidoreduction coenzyme metabolic process	SCH9_YPD_overestimated_proper.txt	GO:0006733	16.0	2.43218684818e-05	101.0
1056	phosphorus metabolic process	SCH9_YPD_overestimated_proper.txt	GO:0006793	49.0	2.96254436572e-05	825.0
1057	carbohydrate biosynthetic process	SCH9_YPD_overestimated_proper.txt	GO:0016051	17.0	3.48461606445e-05	118.0
1058	disaccharide biosynthetic process	SCH9_YPD_overestimated_proper.txt	GO:0046351	6.0	3.91936852445e-05	8.0
1059	glycogen metabolic process	SCH9_YPD_overestimated_proper.txt	GO:0005977	10.0	5.72655816731e-05	35.0
1060	trehalose metabolism in response to stress	SCH9_YPD_overestimated_proper.txt	GO:0070413	5.0	5.81171433702e-05	5.0
1061	oligosaccharide biosynthetic process	SCH9_YPD_overestimated_proper.txt	GO:0009312	6.0	0.000115000124289	9.0
1062	cellular carbohydrate metabolic process	SCH9_YPD_overestimated_proper.txt	GO:0044262	22.0	0.000117887800418	214.0
1063	glucose metabolic process	SCH9_YPD_overestimated_proper.txt	GO:0006006	13.0	0.000121349420604	71.0
1064	pyridine-containing compound metabolic process	SCH9_YPD_overestimated_proper.txt	GO:0072524	15.0	0.000123142408086	98.0
1065	single-organism carbohydrate catabolic process	SCH9_YPD_overestimated_proper.txt	GO:0044724	15.0	0.00016325502524	100.0
1066	pyridine nucleotide metabolic process	SCH9_YPD_overestimated_proper.txt	GO:0019362	14.0	0.000165014523048	86.0
1067	single-organism biosynthetic process	SCH9_YPD_overestimated_proper.txt	GO:0044711	43.0	0.000177815775124	706.0
1068	phosphate-containing compound metabolic process	SCH9_YPD_overestimated_proper.txt	GO:0006796	46.0	0.000243962703373	795.0
1069	cellular carbohydrate biosynthetic process	SCH9_YPD_overestimated_proper.txt	GO:0034637	13.0	0.000460359370909	79.0
1070	carboxylic acid metabolic process	SCH9_YPD_overestimated_proper.txt	GO:0019752	31.0	0.000701244248083	433.0
1071	phosphorylation	SCH9_YPD_overestimated_proper.txt	GO:0016310	29.0	0.000957412651411	392.0
1072	dicarboxylic acid metabolic process	SCH9_YPD_overestimated_proper.txt	GO:0043648	10.0	0.000992527787277	46.0
1073	nicotinamide nucleotide metabolic process	SCH9_YPD_overestimated_proper.txt	GO:0046496	13.0	0.00112593504786	85.0
1074	coenzyme metabolic process	SCH9_YPD_overestimated_proper.txt	GO:0006732	19.0	0.00119535153625	185.0
1075	response to abiotic stimulus	SCH9_YPD_overestimated_proper.txt	GO:0009628	19.0	0.00119535153625	185.0
1076	oxoacid metabolic process	SCH9_YPD_overestimated_proper.txt	GO:0043436	31.0	0.00167362369768	450.0
1077	hexose metabolic process	SCH9_YPD_overestimated_proper.txt	GO:0019318	13.0	0.00170968113911	88.0
1078	carbohydrate catabolic process	SCH9_YPD_overestimated_proper.txt	GO:0016052	15.0	0.00174039536262	119.0
1079	organic acid metabolic process	SCH9_YPD_overestimated_proper.txt	GO:0006082	31.0	0.00175788742238	451.0
1080	single-organism catabolic process	SCH9_YPD_overestimated_proper.txt	GO:0044712	25.0	0.00394872886706	326.0
1081	nucleotide metabolic process	SCH9_YPD_overestimated_proper.txt	GO:0009117	21.0	0.0056368576766	245.0
1082	single-organism process	SCH9_YPD_overestimated_proper.txt	GO:0044699	116.0	0.00641486532412	3416.0
1083	glucan biosynthetic process	SCH9_YPD_overestimated_proper.txt	GO:0009250	9.0	0.00722366460164	44.0
1084	nucleoside phosphate metabolic process	SCH9_YPD_overestimated_proper.txt	GO:0006753	21.0	0.00735066885171	249.0
1085	nucleobase-containing small molecule metabolic process	SCH9_YPD_overestimated_proper.txt	GO:0055086	22.0	0.00767131354766	271.0
1086	nucleoside diphosphate metabolic process	SCH9_YPD_overestimated_proper.txt	GO:0009132	9.0	0.00882634446155	45.0
1087	nucleoside diphosphate phosphorylation	SCH9_YPD_overestimated_proper.txt	GO:0006165	8.0	0.0116653755362	35.0
1088	response to oxidative stress	SCH9_YPD_overestimated_proper.txt	GO:0006979	14.0	0.0168332674616	124.0
1089	ribose phosphate metabolic process	SCH9_YPD_overestimated_proper.txt	GO:0019693	17.0	0.0204192229877	182.0
1090	glucose 6-phosphate metabolic process	SCH9_YPD_overestimated_proper.txt	GO:0051156	7.0	0.0271208571728	28.0
1091	negative regulation of catalytic activity	SCH9_YPD_overestimated_proper.txt	GO:0043086	11.0	0.0294925508868	80.0
1092	pyruvate metabolic process	SCH9_YPD_overestimated_proper.txt	GO:0006090	9.0	0.0313385005393	52.0
1093	cellular glucan metabolic process	SCH9_YPD_overestimated_proper.txt	GO:0006073	10.0	0.0327691217647	66.0
1094	glucan metabolic process	SCH9_YPD_overestimated_proper.txt	GO:0044042	10.0	0.0327691217647	66.0
1095	cofactor metabolic process	SCH9_YPD_overestimated_proper.txt	GO:0051186	19.0	0.0376848230652	232.0
1096	cellular response to oxidative stress	SCH9_YPD_overestimated_proper.txt	GO:0034599	13.0	0.0378837650072	115.0
1097	ADP metabolic process	SCH9_YPD_overestimated_proper.txt	GO:0046031	8.0	0.0414117139079	41.0
1098	mitochondrial translation	YPK1_Rapamycin_underestimated_proper.txt	GO:0032543	37.0	8.12962201661e-30	171.0
1099	amide biosynthetic process	YPK1_Rapamycin_underestimated_proper.txt	GO:0043604	39.0	2.38422709168e-07	820.0
1100	translation	YPK1_Rapamycin_underestimated_proper.txt	GO:0006412	37.0	6.06687957929e-07	765.0
1101	peptide biosynthetic process	YPK1_Rapamycin_underestimated_proper.txt	GO:0043043	37.0	7.07860746654e-07	769.0
1102	cellular amide metabolic process	YPK1_Rapamycin_underestimated_proper.txt	GO:0043603	39.0	2.03959236726e-06	879.0
1103	peptide metabolic process	YPK1_Rapamycin_underestimated_proper.txt	GO:0006518	37.0	2.51966377413e-06	803.0
1104	organonitrogen compound biosynthetic process	YPK1_Rapamycin_underestimated_proper.txt	GO:1901566	45.0	3.99056373014e-06	1164.0
1105	organonitrogen compound metabolic process	YPK1_Rapamycin_underestimated_proper.txt	GO:1901564	47.0	0.000177181785395	1404.0
1106	cellular biosynthetic process	YPK1_Rapamycin_underestimated_proper.txt	GO:0044249	60.0	0.0471755161285	2427.0
1107	chromosome organization	SCH9_YPD_underestimated_proper.txt	GO:0051276	36.0	1.89641303461e-14	619.0
1108	mitotic cell cycle process	SCH9_YPD_underestimated_proper.txt	GO:1903047	24.0	5.64741507193e-09	369.0
1109	chromosome segregation	SCH9_YPD_underestimated_proper.txt	GO:0007059	19.0	1.89977178767e-08	222.0
1110	mitotic cell cycle	SCH9_YPD_underestimated_proper.txt	GO:0000278	24.0	4.27512509263e-08	405.0
1111	mitotic nuclear division	SCH9_YPD_underestimated_proper.txt	GO:0007067	17.0	9.43724722541e-08	184.0
1112	sister chromatid segregation	SCH9_YPD_underestimated_proper.txt	GO:0000819	16.0	1.00594957231e-07	158.0
1113	DNA metabolic process	SCH9_YPD_underestimated_proper.txt	GO:0006259	27.0	1.28410255701e-07	553.0
1114	nuclear chromosome segregation	SCH9_YPD_underestimated_proper.txt	GO:0098813	17.0	1.33591655929e-07	188.0
1115	mitotic sister chromatid segregation	SCH9_YPD_underestimated_proper.txt	GO:0000070	15.0	1.51727036413e-07	137.0
1116	nuclear division	SCH9_YPD_underestimated_proper.txt	GO:0000280	20.0	2.84102281017e-07	292.0
1117	cell cycle process	SCH9_YPD_underestimated_proper.txt	GO:0022402	28.0	9.07066557758e-07	649.0
1118	DNA replication	SCH9_YPD_underestimated_proper.txt	GO:0006260	15.0	1.0907805244e-06	157.0
1119	organelle organization	SCH9_YPD_underestimated_proper.txt	GO:0006996	42.0	1.28499640065e-06	1483.0
1120	cell cycle	SCH9_YPD_underestimated_proper.txt	GO:0007049	31.0	1.43980918817e-06	815.0
1121	DNA conformation change	SCH9_YPD_underestimated_proper.txt	GO:0071103	13.0	3.85390189687e-06	119.0
1122	DNA repair	SCH9_YPD_underestimated_proper.txt	GO:0006281	19.0	4.92859751756e-06	305.0
1123	cellular response to DNA damage stimulus	SCH9_YPD_underestimated_proper.txt	GO:0006974	20.0	1.04258265574e-05	357.0
1124	organelle fission	SCH9_YPD_underestimated_proper.txt	GO:0048285	20.0	2.0439055331e-05	371.0
1125	DNA-dependent DNA replication	SCH9_YPD_underestimated_proper.txt	GO:0006261	13.0	2.68179252424e-05	139.0
1126	negative regulation of cellular process	SCH9_YPD_underestimated_proper.txt	GO:0048523	25.0	3.18644092727e-05	604.0
1127	negative regulation of biological process	SCH9_YPD_underestimated_proper.txt	GO:0048519	25.0	4.32823360785e-05	613.0
1128	mitotic sister chromatid cohesion	SCH9_YPD_underestimated_proper.txt	GO:0007064	8.0	5.77802213484e-05	39.0
1129	sister chromatid cohesion	SCH9_YPD_underestimated_proper.txt	GO:0007062	9.0	0.000102838072155	59.0
1130	negative regulation of cell cycle	SCH9_YPD_underestimated_proper.txt	GO:0045786	12.0	0.000141850394656	131.0
1131	chromosome condensation	SCH9_YPD_underestimated_proper.txt	GO:0030261	6.0	0.000376517699066	20.0
1132	cellular component organization	SCH9_YPD_underestimated_proper.txt	GO:0016043	46.0	0.000459919777294	2086.0
1133	nucleic acid metabolic process	SCH9_YPD_underestimated_proper.txt	GO:0090304	42.0	0.000713513381386	1798.0
1134	double-strand break repair	SCH9_YPD_underestimated_proper.txt	GO:0006302	11.0	0.0017764703171	134.0
1135	DNA packaging	SCH9_YPD_underestimated_proper.txt	GO:0006323	8.0	0.00197472543458	60.0
1136	regulation of cellular process	SCH9_YPD_underestimated_proper.txt	GO:0050794	39.0	0.00198637909167	1634.0
1137	regulation of cell cycle process	SCH9_YPD_underestimated_proper.txt	GO:0010564	13.0	0.00209324015922	200.0
1138	negative regulation of mitotic cell cycle	SCH9_YPD_underestimated_proper.txt	GO:0045930	9.0	0.00238603907626	84.0
1139	cellular component organization or biogenesis	SCH9_YPD_underestimated_proper.txt	GO:0071840	49.0	0.00331462105097	2466.0
1140	single-organism organelle organization	SCH9_YPD_underestimated_proper.txt	GO:1902589	21.0	0.00339081910816	552.0
1141	regulation of cell cycle	SCH9_YPD_underestimated_proper.txt	GO:0051726	15.0	0.00384017954317	286.0
1142	regulation of biological process	SCH9_YPD_underestimated_proper.txt	GO:0050789	39.0	0.00534249775385	1692.0
1143	cell cycle checkpoint	SCH9_YPD_underestimated_proper.txt	GO:0000075	9.0	0.00627773849903	94.0
1144	negative regulation of cell cycle process	SCH9_YPD_underestimated_proper.txt	GO:0010948	9.0	0.00751004980559	96.0
1145	biological regulation	SCH9_YPD_underestimated_proper.txt	GO:0065007	43.0	0.0100323380427	2039.0
1146	response to stress	SCH9_YPD_underestimated_proper.txt	GO:0006950	25.0	0.0128326803178	818.0
1147	regulation of mitotic cell cycle	SCH9_YPD_underestimated_proper.txt	GO:0007346	11.0	0.0160487046558	167.0
1148	cellular response to stress	SCH9_YPD_underestimated_proper.txt	GO:0033554	23.0	0.0187645753685	721.0
1149	mitotic chromosome condensation	SCH9_YPD_underestimated_proper.txt	GO:0007076	4.0	0.028300186083	11.0
1150	nucleobase-containing compound metabolic process	SCH9_YPD_underestimated_proper.txt	GO:0006139	42.0	0.0340878056418	2043.0
1151	cellular aromatic compound metabolic process	SCH9_YPD_underestimated_proper.txt	GO:0006725	43.0	0.0354260098057	2126.0
1152	chromatin organization	SCH9_YPD_underestimated_proper.txt	GO:0006325	15.0	0.0387651035095	344.0
1153	oxidation-reduction process	PBS2_Salt_overestimated_proper.txt	GO:0055114	53.0	4.40127493414e-09	456.0
1154	single-organism metabolic process	PBS2_Salt_overestimated_proper.txt	GO:0044710	109.0	8.03279033155e-09	1470.0
1155	small molecule metabolic process	PBS2_Salt_overestimated_proper.txt	GO:0044281	67.0	1.70645217917e-05	810.0
1156	response to oxidative stress	PBS2_Salt_overestimated_proper.txt	GO:0006979	20.0	0.000547162931042	124.0
1157	cellular response to oxidative stress	PBS2_Salt_overestimated_proper.txt	GO:0034599	19.0	0.00078037867479	115.0
1158	response to toxic substance	PBS2_Salt_overestimated_proper.txt	GO:0009636	11.0	0.00661952262783	45.0
1159	detoxification	PBS2_Salt_overestimated_proper.txt	GO:0098754	10.0	0.00749914947768	37.0
1160	cellular detoxification	PBS2_Salt_overestimated_proper.txt	GO:1990748	10.0	0.00749914947768	37.0
1161	D-xylose catabolic process	PBS2_Salt_overestimated_proper.txt	GO:0042843	4.0	0.0143419459541	4.0
1162	coenzyme metabolic process	PBS2_Salt_overestimated_proper.txt	GO:0006732	22.0	0.0272892642182	185.0
1163	aldehyde catabolic process	PBS2_Salt_overestimated_proper.txt	GO:0046185	5.0	0.0291879192863	8.0
1164	small molecule catabolic process	PBS2_Salt_overestimated_proper.txt	GO:0044282	18.0	0.0334135467479	133.0
1165	single-organism process	PBS2_Salt_overestimated_proper.txt	GO:0044699	171.0	0.0466916666155	3416.0
1166	macromolecule localization	HOG1_Azetidine_underestimated_proper.txt	GO:0033036	43.0	1.03019438108e-07	914.0
1167	protein transport	HOG1_Azetidine_underestimated_proper.txt	GO:0015031	31.0	2.44966843088e-05	600.0
1168	vesicle-mediated transport	HOG1_Azetidine_underestimated_proper.txt	GO:0016192	25.0	2.93811340298e-05	402.0
1169	protein localization	HOG1_Azetidine_underestimated_proper.txt	GO:0008104	35.0	3.25658616151e-05	757.0
1170	organic substance transport	HOG1_Azetidine_underestimated_proper.txt	GO:0071702	39.0	5.12890737567e-05	932.0
1171	establishment of protein localization	HOG1_Azetidine_underestimated_proper.txt	GO:0045184	31.0	5.64312313169e-05	621.0
1172	Golgi vesicle transport	HOG1_Azetidine_underestimated_proper.txt	GO:0048193	17.0	0.000146383019247	201.0
1173	establishment of localization in cell	HOG1_Azetidine_underestimated_proper.txt	GO:0051649	32.0	0.000247758217122	699.0
1174	intracellular transport	HOG1_Azetidine_underestimated_proper.txt	GO:0046907	30.0	0.0006005451089	648.0
1175	cellular protein localization	HOG1_Azetidine_underestimated_proper.txt	GO:0034613	27.0	0.00136483262499	559.0
1176	lipid transport	HOG1_Azetidine_underestimated_proper.txt	GO:0006869	10.0	0.00137134635596	72.0
1177	cellular localization	HOG1_Azetidine_underestimated_proper.txt	GO:0051641	35.0	0.00225111273603	892.0
1178	lipid localization	HOG1_Azetidine_underestimated_proper.txt	GO:0010876	10.0	0.00261637156237	77.0
1179	intracellular protein transport	HOG1_Azetidine_underestimated_proper.txt	GO:0006886	22.0	0.00284254288833	402.0
1180	sterol transport	HOG1_Azetidine_underestimated_proper.txt	GO:0015918	7.0	0.003075999404	31.0
1181	cellular macromolecule localization	HOG1_Azetidine_underestimated_proper.txt	GO:0070727	27.0	0.00367029900241	587.0
1182	transport	HOG1_Azetidine_underestimated_proper.txt	GO:0006810	43.0	0.0293527449655	1368.0
1183	establishment of localization	HOG1_Azetidine_underestimated_proper.txt	GO:0051234	44.0	0.032879569747	1423.0
1184	localization	HOG1_Azetidine_underestimated_proper.txt	GO:0051179	47.0	0.0335010859708	1575.0
1185	fungal-type cell wall organization or biogenesis	PBS2_Menadione_overestimated_proper.txt	GO:0071852	18.0	0.00464904766221	208.0
1186	fungal-type cell wall organization	PBS2_Menadione_overestimated_proper.txt	GO:0031505	16.0	0.00961006066435	175.0
1187	cytoplasmic translation	RIM15_SDC_overestimated_proper.txt	GO:0002181	89.0	1.90539733302e-57	184.0
1188	ribosome biogenesis	RIM15_SDC_overestimated_proper.txt	GO:0042254	130.0	3.71059717854e-51	482.0
1189	ribonucleoprotein complex biogenesis	RIM15_SDC_overestimated_proper.txt	GO:0022613	133.0	9.39985023978e-44	577.0
1190	rRNA processing	RIM15_SDC_overestimated_proper.txt	GO:0006364	86.0	2.66431904986e-27	355.0
1191	rRNA metabolic process	RIM15_SDC_overestimated_proper.txt	GO:0016072	87.0	1.90465511519e-26	372.0
1192	ribosomal small subunit biogenesis	RIM15_SDC_overestimated_proper.txt	GO:0042274	55.0	2.0666124633e-26	147.0
1193	ncRNA processing	RIM15_SDC_overestimated_proper.txt	GO:0034470	97.0	1.72506435346e-25	469.0
1194	ribosomal large subunit biogenesis	RIM15_SDC_overestimated_proper.txt	GO:0042273	49.0	4.93693638348e-25	121.0
1195	ncRNA metabolic process	RIM15_SDC_overestimated_proper.txt	GO:0034660	108.0	1.34879016814e-24	584.0
1196	cellular component biogenesis	RIM15_SDC_overestimated_proper.txt	GO:0044085	166.0	1.17499544408e-21	1299.0
1197	maturation of SSU-rRNA	RIM15_SDC_overestimated_proper.txt	GO:0030490	42.0	3.11652605091e-18	119.0
1198	maturation of SSU-rRNA from tricistronic rRNA transcript (SSU-rRNA, 5.8S rRNA, LSU-rRNA)	RIM15_SDC_overestimated_proper.txt	GO:0000462	40.0	3.98064461201e-18	108.0
1199	RNA processing	RIM15_SDC_overestimated_proper.txt	GO:0006396	100.0	8.12396812036e-16	652.0
1200	endonucleolytic cleavage involved in rRNA processing	RIM15_SDC_overestimated_proper.txt	GO:0000478	27.0	2.06941193218e-14	58.0
1201	endonucleolytic cleavage of tricistronic rRNA transcript (SSU-rRNA, 5.8S rRNA, LSU-rRNA)	RIM15_SDC_overestimated_proper.txt	GO:0000479	27.0	2.06941193218e-14	58.0
1202	ribosome assembly	RIM15_SDC_overestimated_proper.txt	GO:0042255	31.0	2.83454750424e-14	79.0
1203	maturation of 5.8S rRNA from tricistronic rRNA transcript (SSU-rRNA, 5.8S rRNA, LSU-rRNA)	RIM15_SDC_overestimated_proper.txt	GO:0000466	32.0	1.16071806221e-13	88.0
1204	maturation of 5.8S rRNA	RIM15_SDC_overestimated_proper.txt	GO:0000460	32.0	1.71205288559e-13	89.0
1205	gene expression	RIM15_SDC_overestimated_proper.txt	GO:0010467	204.0	4.7382316219e-13	2099.0
1206	translation	RIM15_SDC_overestimated_proper.txt	GO:0006412	102.0	9.3625915726e-12	765.0
1207	peptide biosynthetic process	RIM15_SDC_overestimated_proper.txt	GO:0043043	102.0	1.34927841075e-11	769.0
1208	cellular nitrogen compound metabolic process	RIM15_SDC_overestimated_proper.txt	GO:0034641	242.0	4.98254257223e-11	2792.0
1209	cleavage involved in rRNA processing	RIM15_SDC_overestimated_proper.txt	GO:0000469	28.0	5.74081730215e-11	81.0
1210	maturation of LSU-rRNA	RIM15_SDC_overestimated_proper.txt	GO:0000470	23.0	1.23353041166e-10	55.0
1211	endonucleolytic cleavage in ITS1 to separate SSU-rRNA from 5.8S rRNA and LSU-rRNA from tricistronic rRNA transcript (SSU-rRNA, 5.8S rRNA, LSU-rRNA)	RIM15_SDC_overestimated_proper.txt	GO:0000447	21.0	2.01354738187e-10	46.0
1212	peptide metabolic process	RIM15_SDC_overestimated_proper.txt	GO:0006518	102.0	2.64508889776e-10	803.0
1213	rRNA-containing ribonucleoprotein complex export from nucleus	RIM15_SDC_overestimated_proper.txt	GO:0071428	24.0	4.02816354067e-10	63.0
1214	amide biosynthetic process	RIM15_SDC_overestimated_proper.txt	GO:0043604	102.0	1.07694541138e-09	820.0
1215	rRNA export from nucleus	RIM15_SDC_overestimated_proper.txt	GO:0006407	13.0	5.25965894367e-09	18.0
1216	rRNA transport	RIM15_SDC_overestimated_proper.txt	GO:0051029	13.0	5.25965894367e-09	18.0
1217	nitrogen compound metabolic process	RIM15_SDC_overestimated_proper.txt	GO:0006807	246.0	2.67131631487e-08	2987.0
1218	cellular amide metabolic process	RIM15_SDC_overestimated_proper.txt	GO:0043603	103.0	3.8726352403e-08	879.0
1219	ribosomal small subunit assembly	RIM15_SDC_overestimated_proper.txt	GO:0000028	15.0	1.0086078496e-07	29.0
1220	cellular component organization or biogenesis	RIM15_SDC_overestimated_proper.txt	GO:0071840	212.0	1.81044588519e-07	2466.0
1221	ribonucleoprotein complex assembly	RIM15_SDC_overestimated_proper.txt	GO:0022618	38.0	2.0208893217e-07	189.0
1222	ribonucleoprotein complex subunit organization	RIM15_SDC_overestimated_proper.txt	GO:0071826	39.0	3.43194023616e-07	201.0
1223	cellular macromolecule metabolic process	RIM15_SDC_overestimated_proper.txt	GO:0044260	248.0	1.2235414159e-06	3107.0
1224	organelle assembly	RIM15_SDC_overestimated_proper.txt	GO:0070925	35.0	1.47212946227e-06	175.0
1225	maturation of LSU-rRNA from tricistronic rRNA transcript (SSU-rRNA, 5.8S rRNA, LSU-rRNA)	RIM15_SDC_overestimated_proper.txt	GO:0000463	17.0	1.4839067479e-06	44.0
1226	RNA phosphodiester bond hydrolysis, endonucleolytic	RIM15_SDC_overestimated_proper.txt	GO:0090502	30.0	7.522648507e-06	142.0
1227	macromolecule metabolic process	RIM15_SDC_overestimated_proper.txt	GO:0043170	252.0	7.94856385032e-06	3221.0
1228	nuclear export	RIM15_SDC_overestimated_proper.txt	GO:0051168	29.0	1.13987736158e-05	136.0
1229	ribonucleoprotein complex export from nucleus	RIM15_SDC_overestimated_proper.txt	GO:0071426	28.0	1.18491983452e-05	128.0
1230	ribonucleoprotein complex localization	RIM15_SDC_overestimated_proper.txt	GO:0071166	28.0	1.71968614853e-05	130.0
1231	organonitrogen compound biosynthetic process	RIM15_SDC_overestimated_proper.txt	GO:1901566	116.0	4.75650283773e-05	1164.0
1232	ribosomal large subunit assembly	RIM15_SDC_overestimated_proper.txt	GO:0000027	15.0	6.0887181247e-05	42.0
1233	endonucleolytic cleavage in 5'-ETS of tricistronic rRNA transcript (SSU-rRNA, 5.8S rRNA, LSU-rRNA)	RIM15_SDC_overestimated_proper.txt	GO:0000480	13.0	0.000149326587857	33.0
1234	nucleocytoplasmic transport	RIM15_SDC_overestimated_proper.txt	GO:0006913	32.0	0.00024124600078	182.0
1235	nuclear transport	RIM15_SDC_overestimated_proper.txt	GO:0051169	32.0	0.000276051632874	183.0
1236	endonucleolytic cleavage to generate mature 5'-end of SSU-rRNA from (SSU-rRNA, 5.8S rRNA, LSU-rRNA)	RIM15_SDC_overestimated_proper.txt	GO:0000472	13.0	0.000343112786587	35.0
1237	organonitrogen compound metabolic process	RIM15_SDC_overestimated_proper.txt	GO:1901564	130.0	0.000426212288824	1404.0
1238	rRNA 5'-end processing	RIM15_SDC_overestimated_proper.txt	GO:0000967	13.0	0.000507194256033	36.0
1239	ncRNA 5'-end processing	RIM15_SDC_overestimated_proper.txt	GO:0034471	13.0	0.000507194256033	36.0
1240	RNA 5'-end processing	RIM15_SDC_overestimated_proper.txt	GO:0000966	13.0	0.000738469224327	37.0
1241	primary metabolic process	RIM15_SDC_overestimated_proper.txt	GO:0044238	282.0	0.000835977432517	3879.0
1242	cellular macromolecule biosynthetic process	RIM15_SDC_overestimated_proper.txt	GO:0034645	162.0	0.000841279329596	1889.0
1243	RNA phosphodiester bond hydrolysis	RIM15_SDC_overestimated_proper.txt	GO:0090501	32.0	0.00127698190273	195.0
1244	macromolecule biosynthetic process	RIM15_SDC_overestimated_proper.txt	GO:0009059	162.0	0.00139652902554	1902.0
1245	ADP metabolic process	RIM15_SDC_overestimated_proper.txt	GO:0046031	13.0	0.00290777322001	41.0
1246	purine nucleoside diphosphate metabolic process	RIM15_SDC_overestimated_proper.txt	GO:0009135	13.0	0.00397821688113	42.0
1247	purine ribonucleoside diphosphate metabolic process	RIM15_SDC_overestimated_proper.txt	GO:0009179	13.0	0.00397821688113	42.0
1248	ribonucleoside diphosphate metabolic process	RIM15_SDC_overestimated_proper.txt	GO:0009185	13.0	0.00397821688113	42.0
1249	RNA metabolic process	RIM15_SDC_overestimated_proper.txt	GO:0016070	135.0	0.00763645616849	1545.0
1250	nucleobase-containing compound metabolic process	RIM15_SDC_overestimated_proper.txt	GO:0006139	168.0	0.00869455401504	2043.0
1251	nucleoside diphosphate metabolic process	RIM15_SDC_overestimated_proper.txt	GO:0009132	13.0	0.00959143840321	45.0
1252	cellular nitrogen compound biosynthetic process	RIM15_SDC_overestimated_proper.txt	GO:0044271	155.0	0.0202071894301	1869.0
1253	cellular metabolic process	RIM15_SDC_overestimated_proper.txt	GO:0044237	282.0	0.0264444224117	3978.0
1254	vacuolar transport	RIM11_Heatshock_overestimated_proper.txt	GO:0007034	45.0	2.74365562367e-10	179.0
1255	protein transport	RIM11_Heatshock_overestimated_proper.txt	GO:0015031	94.0	5.39073872775e-10	600.0
1256	establishment of protein localization	RIM11_Heatshock_overestimated_proper.txt	GO:0045184	95.0	1.73731431572e-09	621.0
1257	transport	RIM11_Heatshock_overestimated_proper.txt	GO:0006810	163.0	5.50600613276e-09	1368.0
1258	establishment of localization	RIM11_Heatshock_overestimated_proper.txt	GO:0051234	167.0	9.45040263325e-09	1423.0
1259	protein targeting to vacuole	RIM11_Heatshock_overestimated_proper.txt	GO:0006623	34.0	1.73466135485e-08	122.0
1260	establishment of protein localization to vacuole	RIM11_Heatshock_overestimated_proper.txt	GO:0072666	34.0	1.73466135485e-08	122.0
1261	intracellular protein transport	RIM11_Heatshock_overestimated_proper.txt	GO:0006886	69.0	2.76274505685e-08	402.0
1262	vesicle-mediated transport	RIM11_Heatshock_overestimated_proper.txt	GO:0016192	69.0	2.76274505685e-08	402.0
1263	organic substance transport	RIM11_Heatshock_overestimated_proper.txt	GO:0071702	122.0	3.13235203328e-08	932.0
1264	protein localization to vacuole	RIM11_Heatshock_overestimated_proper.txt	GO:0072665	34.0	4.71376682149e-08	126.0
1265	localization	RIM11_Heatshock_overestimated_proper.txt	GO:0051179	176.0	1.49327792658e-07	1575.0
1266	endosomal transport	RIM11_Heatshock_overestimated_proper.txt	GO:0016197	31.0	2.55502768308e-07	113.0
1267	Golgi vesicle transport	RIM11_Heatshock_overestimated_proper.txt	GO:0048193	42.0	1.3131629906e-06	201.0
1268	CVT pathway	RIM11_Heatshock_overestimated_proper.txt	GO:0032258	20.0	1.46097328485e-06	53.0
1269	cellular macromolecule localization	RIM11_Heatshock_overestimated_proper.txt	GO:0070727	84.0	2.07604297998e-06	587.0
1270	cellular protein localization	RIM11_Heatshock_overestimated_proper.txt	GO:0034613	81.0	2.47589015926e-06	559.0
1271	protein localization	RIM11_Heatshock_overestimated_proper.txt	GO:0008104	100.0	3.1172398775e-06	757.0
1272	macromolecule localization	RIM11_Heatshock_overestimated_proper.txt	GO:0033036	114.0	4.81427518095e-06	914.0
1273	cytosolic transport	RIM11_Heatshock_overestimated_proper.txt	GO:0016482	19.0	1.64256154036e-05	54.0
1274	establishment of localization in cell	RIM11_Heatshock_overestimated_proper.txt	GO:0051649	92.0	2.30687653277e-05	699.0
1275	vacuole organization	RIM11_Heatshock_overestimated_proper.txt	GO:0007033	26.0	4.3044865916e-05	101.0
1276	post-Golgi vesicle-mediated transport	RIM11_Heatshock_overestimated_proper.txt	GO:0006892	22.0	7.86047835079e-05	77.0
1277	intracellular transport	RIM11_Heatshock_overestimated_proper.txt	GO:0046907	84.0	0.000268729866416	648.0
1278	vesicle tethering	RIM11_Heatshock_overestimated_proper.txt	GO:0099022	9.0	0.000428400416806	14.0
1279	cellular localization	RIM11_Heatshock_overestimated_proper.txt	GO:0051641	104.0	0.00135984335518	892.0
1280	protein targeting	RIM11_Heatshock_overestimated_proper.txt	GO:0006605	50.0	0.00157615830116	327.0
1281	macroautophagy	RIM11_Heatshock_overestimated_proper.txt	GO:0016236	24.0	0.00325784142351	108.0
1282	SNARE complex assembly	RIM11_Heatshock_overestimated_proper.txt	GO:0035493	8.0	0.0038295103779	13.0
1283	mitophagy	RIM11_Heatshock_overestimated_proper.txt	GO:0000422	13.0	0.00545994676267	37.0
1284	mitochondrion disassembly	RIM11_Heatshock_overestimated_proper.txt	GO:0061726	13.0	0.00545994676267	37.0
1285	regulation of SNARE complex assembly	RIM11_Heatshock_overestimated_proper.txt	GO:0035542	7.0	0.00565032549001	10.0
1286	autophagy	RIM11_Heatshock_overestimated_proper.txt	GO:0006914	31.0	0.0133253023536	174.0
1287	autophagosome assembly	RIM11_Heatshock_overestimated_proper.txt	GO:0000045	12.0	0.0192772020204	35.0
1288	autophagosome organization	RIM11_Heatshock_overestimated_proper.txt	GO:1905037	12.0	0.0192772020204	35.0
1289	piecemeal microautophagy of nucleus	RIM11_Heatshock_overestimated_proper.txt	GO:0034727	13.0	0.0205451210416	41.0
1290	protein localization to organelle	RIM11_Heatshock_overestimated_proper.txt	GO:0033365	55.0	0.0349812046185	413.0
1291	establishment of protein localization to organelle	RIM11_Heatshock_overestimated_proper.txt	GO:0072594	47.0	0.0367380740436	333.0
1292	nucleophagy	RIM11_Heatshock_overestimated_proper.txt	GO:0044804	13.0	0.0372043666719	43.0
1293	organelle disassembly	RIM11_Heatshock_overestimated_proper.txt	GO:1903008	15.0	0.0493699411725	57.0
1294	proteolysis involved in cellular protein catabolic process	ATG1_Menadione_overestimated_proper.txt	GO:0051603	20.0	0.00557078566574	250.0
1295	ubiquitin-dependent protein catabolic process	ATG1_Menadione_overestimated_proper.txt	GO:0006511	19.0	0.00614273053813	229.0
1296	modification-dependent protein catabolic process	ATG1_Menadione_overestimated_proper.txt	GO:0019941	19.0	0.00614273053813	229.0
1297	cellular protein catabolic process	ATG1_Menadione_overestimated_proper.txt	GO:0044257	20.0	0.0185758512242	270.0
1298	modification-dependent macromolecule catabolic process	ATG1_Menadione_overestimated_proper.txt	GO:0043632	19.0	0.0243491138986	251.0
1299	cellular carbohydrate metabolic process	ATG1_Menadione_overestimated_proper.txt	GO:0044262	17.0	0.0426700871662	214.0
1300	phosphorylation of RNA polymerase II C-terminal domain	TOR2_SDC_underestimated_proper.txt	GO:0070816	8.0	0.00671114130415	24.0
1301	carboxylic acid transport	TOR2_SDC_underestimated_proper.txt	GO:0046942	15.0	0.00771646575788	95.0
1302	organic acid transport	TOR2_SDC_underestimated_proper.txt	GO:0015849	15.0	0.0101338560687	97.0
1303	anion transport	TOR2_SDC_underestimated_proper.txt	GO:0006820	22.0	0.0107929970962	195.0
1304	oxidation-reduction process	TOR2_SDC_underestimated_proper.txt	GO:0055114	37.0	0.0139381546687	456.0
1305	protein catabolic process	TOR2_SDC_underestimated_proper.txt	GO:0030163	27.0	0.0307377223527	290.0
1306	response to chemical	TOR2_SDC_underestimated_proper.txt	GO:0042221	40.0	0.0316307616567	530.0
1307	anion transmembrane transport	TOR2_SDC_underestimated_proper.txt	GO:0098656	14.0	0.0402751379215	95.0
1308	small molecule biosynthetic process	KSP1_Menadione_overestimated_proper.txt	GO:0044283	9.0	0.000654834751373	336.0
1309	riboflavin metabolic process	KSP1_Menadione_overestimated_proper.txt	GO:0006771	3.0	0.00403307109467	7.0
1310	riboflavin biosynthetic process	KSP1_Menadione_overestimated_proper.txt	GO:0009231	3.0	0.00403307109467	7.0
1311	flavin-containing compound biosynthetic process	KSP1_Menadione_overestimated_proper.txt	GO:0042727	3.0	0.00643854997855	8.0
1312	flavin-containing compound metabolic process	KSP1_Menadione_overestimated_proper.txt	GO:0042726	3.0	0.00963816350665	9.0
1313	single-organism biosynthetic process	KSP1_Menadione_overestimated_proper.txt	GO:0044711	10.0	0.0363852626643	706.0
1314	chromatin silencing	WT2_Tunicamycin_overestimated_proper.txt	GO:0006342	6.0	0.0422938828797	157.0
1315	negative regulation of gene expression, epigenetic	WT2_Tunicamycin_overestimated_proper.txt	GO:0045814	6.0	0.0422938828797	157.0
1316	regulation of gene expression, epigenetic	WT2_Tunicamycin_overestimated_proper.txt	GO:0040029	6.0	0.0471662456338	160.0
1317	regulation of nucleobase-containing compound metabolic process	RIM15_Rapamycin_overestimated_proper.txt	GO:0019219	13.0	0.0204790348594	840.0
1318	regulation of nucleic acid-templated transcription	RIM15_Rapamycin_overestimated_proper.txt	GO:1903506	12.0	0.0389659099543	741.0
1319	regulation of RNA biosynthetic process	RIM15_Rapamycin_overestimated_proper.txt	GO:2001141	12.0	0.0389659099543	741.0
1320	mitochondrial translation	WT1_Heatshock_overestimated_proper.txt	GO:0032543	16.0	5.47852548578e-07	171.0
1321	protein transmembrane transport	WT1_Heatshock_overestimated_proper.txt	GO:0071806	10.0	0.00110629043563	98.0
1322	intracellular protein transmembrane transport	WT1_Heatshock_overestimated_proper.txt	GO:0065002	9.0	0.00815087984329	94.0
1323	protein targeting to mitochondrion	WT1_Heatshock_overestimated_proper.txt	GO:0006626	7.0	0.0477718340923	63.0
1324	sexual reproduction	TPK123_Salt_overestimated_proper.txt	GO:0019953	23.0	0.0384090153786	248.0
1325	multi-organism reproductive process	TPK123_Salt_overestimated_proper.txt	GO:0044703	23.0	0.0384090153786	248.0
1326	cellular component organization	KIN1_Tunicamycin_underestimated_proper.txt	GO:0016043	78.0	0.0135902902047	2086.0
1327	organonitrogen compound catabolic process	YPK3_Heatshock_overestimated_proper.txt	GO:1901565	27.0	1.26646766028e-08	109.0
1328	cellular amide catabolic process	YPK3_Heatshock_overestimated_proper.txt	GO:0043605	8.0	1.86578990936e-06	9.0
1329	allantoin metabolic process	YPK3_Heatshock_overestimated_proper.txt	GO:0000255	7.0	4.35654362845e-06	7.0
1330	allantoin catabolic process	YPK3_Heatshock_overestimated_proper.txt	GO:0000256	7.0	4.35654362845e-06	7.0
1331	single-organism process	YPK3_Heatshock_overestimated_proper.txt	GO:0044699	215.0	0.000841788684653	3416.0
1332	ammonium transport	YPK3_Heatshock_overestimated_proper.txt	GO:0015696	9.0	0.00109528492552	20.0
1333	single-organism metabolic process	YPK3_Heatshock_overestimated_proper.txt	GO:0044710	111.0	0.00604606793649	1470.0
1334	small molecule metabolic process	YPK3_Heatshock_overestimated_proper.txt	GO:0044281	70.0	0.0140847605205	810.0
1335	cell wall organization or biogenesis	STE11_Menadione_overestimated_proper.txt	GO:0071554	53.0	9.31656846763e-08	278.0
1336	mitotic cell cycle process	STE11_Menadione_overestimated_proper.txt	GO:1903047	62.0	4.33343137845e-07	369.0
1337	mitotic cell cycle	STE11_Menadione_overestimated_proper.txt	GO:0000278	65.0	1.09574087002e-06	405.0
1338	cell division	STE11_Menadione_overestimated_proper.txt	GO:0051301	53.0	6.39971334954e-06	310.0
1339	cell cycle	STE11_Menadione_overestimated_proper.txt	GO:0007049	103.0	6.53726689752e-06	815.0
1340	fungal-type cell wall organization or biogenesis	STE11_Menadione_overestimated_proper.txt	GO:0071852	41.0	7.78716438269e-06	208.0
1341	external encapsulating structure organization	STE11_Menadione_overestimated_proper.txt	GO:0045229	43.0	9.56359955548e-06	226.0
1342	cell wall organization	STE11_Menadione_overestimated_proper.txt	GO:0071555	43.0	9.56359955548e-06	226.0
1343	single-organism process	STE11_Menadione_overestimated_proper.txt	GO:0044699	300.0	2.67893105175e-05	3416.0
1344	fungal-type cell wall organization	STE11_Menadione_overestimated_proper.txt	GO:0031505	33.0	0.00102627427579	175.0
1345	cell cycle process	STE11_Menadione_overestimated_proper.txt	GO:0022402	81.0	0.00111448008877	649.0
1346	cell cycle phase transition	STE11_Menadione_overestimated_proper.txt	GO:0044770	32.0	0.00553240647759	179.0
1347	mitotic cell cycle phase transition	STE11_Menadione_overestimated_proper.txt	GO:0044772	32.0	0.00553240647759	179.0
1348	G1/S transition of mitotic cell cycle	STE11_Menadione_overestimated_proper.txt	GO:0000082	17.0	0.0207833837942	68.0
1349	cell cycle G1/S phase transition	STE11_Menadione_overestimated_proper.txt	GO:0044843	17.0	0.0207833837942	68.0
1350	oxidation-reduction process	SSN3_Menadione_underestimated_proper.txt	GO:0055114	61.0	2.87881693657e-07	456.0
1351	generation of precursor metabolites and energy	SSN3_Menadione_underestimated_proper.txt	GO:0006091	37.0	4.9251278807e-07	203.0
1352	small molecule metabolic process	SSN3_Menadione_underestimated_proper.txt	GO:0044281	88.0	7.70657983695e-07	810.0
1353	energy derivation by oxidation of organic compounds	SSN3_Menadione_underestimated_proper.txt	GO:0015980	32.0	1.39202987862e-06	163.0
1354	single-organism metabolic process	SSN3_Menadione_underestimated_proper.txt	GO:0044710	131.0	5.79053184312e-06	1470.0
1355	cellular carbohydrate metabolic process	SSN3_Menadione_underestimated_proper.txt	GO:0044262	35.0	3.39101253019e-05	214.0
1356	carbohydrate metabolic process	SSN3_Menadione_underestimated_proper.txt	GO:0005975	43.0	0.000135051230118	313.0
1357	ribose phosphate metabolic process	SSN3_Menadione_underestimated_proper.txt	GO:0019693	30.0	0.000367024679821	182.0
1358	nucleotide metabolic process	SSN3_Menadione_underestimated_proper.txt	GO:0009117	36.0	0.000367076730168	245.0
1359	nucleoside phosphate metabolic process	SSN3_Menadione_underestimated_proper.txt	GO:0006753	36.0	0.000559850370779	249.0
1360	phosphorus metabolic process	SSN3_Menadione_underestimated_proper.txt	GO:0006793	81.0	0.00064497923346	825.0
1361	single-organism carbohydrate metabolic process	SSN3_Menadione_underestimated_proper.txt	GO:0044723	37.0	0.000920419752206	265.0
1362	glycogen metabolic process	SSN3_Menadione_underestimated_proper.txt	GO:0005977	12.0	0.00113621670571	35.0
1363	energy reserve metabolic process	SSN3_Menadione_underestimated_proper.txt	GO:0006112	12.0	0.00227604887435	37.0
1364	single-organism process	SSN3_Menadione_underestimated_proper.txt	GO:0044699	234.0	0.00245713109236	3416.0
1365	nucleobase-containing small molecule metabolic process	SSN3_Menadione_underestimated_proper.txt	GO:0055086	36.0	0.00474495471349	271.0
1366	phosphate-containing compound metabolic process	SSN3_Menadione_underestimated_proper.txt	GO:0006796	76.0	0.0053995419609	795.0
1367	trehalose metabolic process	SSN3_Menadione_underestimated_proper.txt	GO:0005991	7.0	0.00550874689163	12.0
1368	glycogen biosynthetic process	SSN3_Menadione_underestimated_proper.txt	GO:0005978	9.0	0.00698135514486	22.0
1369	aerobic respiration	SSN3_Menadione_underestimated_proper.txt	GO:0009060	17.0	0.00791505701683	80.0
1370	ribonucleotide metabolic process	SSN3_Menadione_underestimated_proper.txt	GO:0009259	25.0	0.0166614250654	162.0
1371	ribonucleotide biosynthetic process	SSN3_Menadione_underestimated_proper.txt	GO:0009260	16.0	0.0263786754228	78.0
1372	ribosome biogenesis	CDC5_Tunicamycin_overestimated_proper.txt	GO:0042254	125.0	1.00381807579e-61	482.0
1373	ribonucleoprotein complex biogenesis	CDC5_Tunicamycin_overestimated_proper.txt	GO:0022613	132.0	1.00912689195e-58	577.0
1374	ncRNA metabolic process	CDC5_Tunicamycin_overestimated_proper.txt	GO:0034660	111.0	1.89334354833e-38	584.0
1375	cytoplasmic translation	CDC5_Tunicamycin_overestimated_proper.txt	GO:0002181	64.0	3.32459856593e-36	184.0
1376	ncRNA processing	CDC5_Tunicamycin_overestimated_proper.txt	GO:0034470	96.0	7.29580020736e-35	469.0
1377	rRNA processing	CDC5_Tunicamycin_overestimated_proper.txt	GO:0006364	82.0	7.95795704416e-33	355.0
1378	ribosomal small subunit biogenesis	CDC5_Tunicamycin_overestimated_proper.txt	GO:0042274	54.0	2.9395549663e-31	147.0
1379	rRNA metabolic process	CDC5_Tunicamycin_overestimated_proper.txt	GO:0016072	82.0	3.30138617394e-31	372.0
1380	RNA processing	CDC5_Tunicamycin_overestimated_proper.txt	GO:0006396	102.0	9.53158139437e-27	652.0
1381	cellular component biogenesis	CDC5_Tunicamycin_overestimated_proper.txt	GO:0044085	147.0	2.70932724184e-26	1299.0
1382	gene expression	CDC5_Tunicamycin_overestimated_proper.txt	GO:0010467	191.0	6.35130677224e-26	2099.0
1383	maturation of SSU-rRNA	CDC5_Tunicamycin_overestimated_proper.txt	GO:0030490	42.0	1.16636721887e-22	119.0
1384	maturation of SSU-rRNA from tricistronic rRNA transcript (SSU-rRNA, 5.8S rRNA, LSU-rRNA)	CDC5_Tunicamycin_overestimated_proper.txt	GO:0000462	40.0	2.32858069595e-22	108.0
1385	ribosomal large subunit biogenesis	CDC5_Tunicamycin_overestimated_proper.txt	GO:0042273	42.0	2.52897768152e-22	121.0
1386	ribosome assembly	CDC5_Tunicamycin_overestimated_proper.txt	GO:0042255	33.0	6.81163155467e-20	79.0
1387	cellular nitrogen compound metabolic process	CDC5_Tunicamycin_overestimated_proper.txt	GO:0034641	212.0	3.43536613755e-19	2792.0
1388	RNA metabolic process	CDC5_Tunicamycin_overestimated_proper.txt	GO:0016070	144.0	2.9921621062e-16	1545.0
1389	maturation of 5.8S rRNA	CDC5_Tunicamycin_overestimated_proper.txt	GO:0000460	31.0	1.00157254361e-15	89.0
1390	nitrogen compound metabolic process	CDC5_Tunicamycin_overestimated_proper.txt	GO:0006807	214.0	1.18231450389e-15	2987.0
1391	cellular macromolecule metabolic process	CDC5_Tunicamycin_overestimated_proper.txt	GO:0044260	218.0	4.28029888112e-15	3107.0
1392	ribonucleoprotein complex assembly	CDC5_Tunicamycin_overestimated_proper.txt	GO:0022618	43.0	7.26035707191e-15	189.0
1393	maturation of 5.8S rRNA from tricistronic rRNA transcript (SSU-rRNA, 5.8S rRNA, LSU-rRNA)	CDC5_Tunicamycin_overestimated_proper.txt	GO:0000466	30.0	8.03362166131e-15	88.0
1394	ribonucleoprotein complex subunit organization	CDC5_Tunicamycin_overestimated_proper.txt	GO:0071826	44.0	1.35966366002e-14	201.0
1395	macromolecule metabolic process	CDC5_Tunicamycin_overestimated_proper.txt	GO:0043170	220.0	1.14144645649e-13	3221.0
1396	maturation of LSU-rRNA	CDC5_Tunicamycin_overestimated_proper.txt	GO:0000470	23.0	4.87527578469e-13	55.0
1397	nucleic acid metabolic process	CDC5_Tunicamycin_overestimated_proper.txt	GO:0090304	151.0	6.78396508201e-13	1798.0
1398	cleavage involved in rRNA processing	CDC5_Tunicamycin_overestimated_proper.txt	GO:0000469	27.0	8.85596086284e-13	81.0
1399	rRNA-containing ribonucleoprotein complex export from nucleus	CDC5_Tunicamycin_overestimated_proper.txt	GO:0071428	24.0	1.33979085593e-12	63.0
1400	ribonucleoprotein complex export from nucleus	CDC5_Tunicamycin_overestimated_proper.txt	GO:0071426	33.0	1.93419007706e-12	128.0
1401	endonucleolytic cleavage involved in rRNA processing	CDC5_Tunicamycin_overestimated_proper.txt	GO:0000478	23.0	2.01542781147e-12	58.0
1402	endonucleolytic cleavage of tricistronic rRNA transcript (SSU-rRNA, 5.8S rRNA, LSU-rRNA)	CDC5_Tunicamycin_overestimated_proper.txt	GO:0000479	23.0	2.01542781147e-12	58.0
1403	ribonucleoprotein complex localization	CDC5_Tunicamycin_overestimated_proper.txt	GO:0071166	33.0	3.19605830208e-12	130.0
1404	nucleobase-containing compound metabolic process	CDC5_Tunicamycin_overestimated_proper.txt	GO:0006139	162.0	4.71572509136e-12	2043.0
1405	heterocycle metabolic process	CDC5_Tunicamycin_overestimated_proper.txt	GO:0046483	166.0	1.28364109957e-11	2141.0
1406	nuclear export	CDC5_Tunicamycin_overestimated_proper.txt	GO:0051168	33.0	1.35827684313e-11	136.0
1407	cellular aromatic compound metabolic process	CDC5_Tunicamycin_overestimated_proper.txt	GO:0006725	165.0	1.62778053931e-11	2126.0
1408	ribosomal small subunit assembly	CDC5_Tunicamycin_overestimated_proper.txt	GO:0000028	16.0	1.08553449783e-10	29.0
1409	nucleocytoplasmic transport	CDC5_Tunicamycin_overestimated_proper.txt	GO:0006913	37.0	1.08927994635e-10	182.0
1410	nuclear transport	CDC5_Tunicamycin_overestimated_proper.txt	GO:0051169	37.0	1.30825099492e-10	183.0
1411	organic cyclic compound metabolic process	CDC5_Tunicamycin_overestimated_proper.txt	GO:1901360	166.0	2.64432411825e-10	2203.0
1412	organelle assembly	CDC5_Tunicamycin_overestimated_proper.txt	GO:0070925	35.0	9.87269009662e-10	175.0
1413	translation	CDC5_Tunicamycin_overestimated_proper.txt	GO:0006412	82.0	1.0587736616e-09	765.0
1414	peptide biosynthetic process	CDC5_Tunicamycin_overestimated_proper.txt	GO:0043043	82.0	1.42353675568e-09	769.0
1415	maturation of LSU-rRNA from tricistronic rRNA transcript (SSU-rRNA, 5.8S rRNA, LSU-rRNA)	CDC5_Tunicamycin_overestimated_proper.txt	GO:0000463	18.0	1.91802927115e-09	44.0
1416	amide biosynthetic process	CDC5_Tunicamycin_overestimated_proper.txt	GO:0043604	85.0	2.22179984539e-09	820.0
1417	rRNA export from nucleus	CDC5_Tunicamycin_overestimated_proper.txt	GO:0006407	12.0	9.10834681394e-09	18.0
1418	rRNA transport	CDC5_Tunicamycin_overestimated_proper.txt	GO:0051029	12.0	9.10834681394e-09	18.0
1419	peptide metabolic process	CDC5_Tunicamycin_overestimated_proper.txt	GO:0006518	82.0	1.59255611223e-08	803.0
1420	cellular amide metabolic process	CDC5_Tunicamycin_overestimated_proper.txt	GO:0043603	86.0	4.17694221491e-08	879.0
1421	endonucleolytic cleavage in ITS1 to separate SSU-rRNA from 5.8S rRNA and LSU-rRNA from tricistronic rRNA transcript (SSU-rRNA, 5.8S rRNA, LSU-rRNA)	CDC5_Tunicamycin_overestimated_proper.txt	GO:0000447	17.0	6.30369520638e-08	46.0
1422	cellular component organization or biogenesis	CDC5_Tunicamycin_overestimated_proper.txt	GO:0071840	172.0	1.30315963204e-07	2466.0
1423	primary metabolic process	CDC5_Tunicamycin_overestimated_proper.txt	GO:0044238	233.0	2.43423466952e-07	3879.0
1424	cellular metabolic process	CDC5_Tunicamycin_overestimated_proper.txt	GO:0044237	236.0	5.52204156128e-07	3978.0
1425	organic substance metabolic process	CDC5_Tunicamycin_overestimated_proper.txt	GO:0071704	237.0	2.47085909157e-06	4043.0
1426	cellular nitrogen compound biosynthetic process	CDC5_Tunicamycin_overestimated_proper.txt	GO:0044271	138.0	2.97172805688e-06	1869.0
1427	cellular macromolecule biosynthetic process	CDC5_Tunicamycin_overestimated_proper.txt	GO:0034645	139.0	3.0886924435e-06	1889.0
1428	macromolecule biosynthetic process	CDC5_Tunicamycin_overestimated_proper.txt	GO:0009059	139.0	5.23761345657e-06	1902.0
1429	metabolic process	CDC5_Tunicamycin_overestimated_proper.txt	GO:0008152	241.0	1.68000986125e-05	4200.0
1430	RNA export from nucleus	CDC5_Tunicamycin_overestimated_proper.txt	GO:0006405	21.0	2.81986120378e-05	99.0
1431	organonitrogen compound biosynthetic process	CDC5_Tunicamycin_overestimated_proper.txt	GO:1901566	96.0	3.16228711479e-05	1164.0
1432	RNA transport	CDC5_Tunicamycin_overestimated_proper.txt	GO:0050658	24.0	0.000105669231494	136.0
1433	establishment of RNA localization	CDC5_Tunicamycin_overestimated_proper.txt	GO:0051236	24.0	0.000105669231494	136.0
1434	tRNA metabolic process	CDC5_Tunicamycin_overestimated_proper.txt	GO:0006399	30.0	0.00012403244281	203.0
1435	nucleic acid transport	CDC5_Tunicamycin_overestimated_proper.txt	GO:0050657	24.0	0.000142032244818	138.0
1436	RNA phosphodiester bond hydrolysis	CDC5_Tunicamycin_overestimated_proper.txt	GO:0090501	29.0	0.000187219914789	195.0
1437	ribosomal large subunit assembly	CDC5_Tunicamycin_overestimated_proper.txt	GO:0000027	13.0	0.000211143480599	42.0
1438	RNA localization	CDC5_Tunicamycin_overestimated_proper.txt	GO:0006403	25.0	0.000262479869246	153.0
1439	nucleobase-containing compound transport	CDC5_Tunicamycin_overestimated_proper.txt	GO:0015931	28.0	0.000502923147768	192.0
1440	macromolecular complex subunit organization	CDC5_Tunicamycin_overestimated_proper.txt	GO:0043933	65.0	0.000668870517423	715.0
1441	endonucleolytic cleavage in 5'-ETS of tricistronic rRNA transcript (SSU-rRNA, 5.8S rRNA, LSU-rRNA)	CDC5_Tunicamycin_overestimated_proper.txt	GO:0000480	11.0	0.00102300535813	33.0
1442	RNA phosphodiester bond hydrolysis, endonucleolytic	CDC5_Tunicamycin_overestimated_proper.txt	GO:0090502	23.0	0.00108965881763	142.0
1443	endonucleolytic cleavage to generate mature 3'-end of SSU-rRNA from (SSU-rRNA, 5.8S rRNA, LSU-rRNA)	CDC5_Tunicamycin_overestimated_proper.txt	GO:0000461	5.0	0.00129107203094	5.0
1444	endonucleolytic cleavage to generate mature 5'-end of SSU-rRNA from (SSU-rRNA, 5.8S rRNA, LSU-rRNA)	CDC5_Tunicamycin_overestimated_proper.txt	GO:0000472	11.0	0.00202173287857	35.0
1445	transcription from RNA polymerase I promoter	CDC5_Tunicamycin_overestimated_proper.txt	GO:0006360	15.0	0.0026940013897	68.0
1446	rRNA 5'-end processing	CDC5_Tunicamycin_overestimated_proper.txt	GO:0000967	11.0	0.00278720517814	36.0
1447	ncRNA 5'-end processing	CDC5_Tunicamycin_overestimated_proper.txt	GO:0034471	11.0	0.00278720517814	36.0
1448	RNA 5'-end processing	CDC5_Tunicamycin_overestimated_proper.txt	GO:0000966	11.0	0.00379737765323	37.0
1449	cellular biosynthetic process	CDC5_Tunicamycin_overestimated_proper.txt	GO:0044249	156.0	0.00385632380491	2427.0
1450	cellular macromolecular complex assembly	CDC5_Tunicamycin_overestimated_proper.txt	GO:0034622	53.0	0.00685469938244	571.0
1451	macromolecular complex assembly	CDC5_Tunicamycin_overestimated_proper.txt	GO:0065003	55.0	0.00804751502072	605.0
1452	ribosomal subunit export from nucleus	CDC5_Tunicamycin_overestimated_proper.txt	GO:0000054	12.0	0.00923671177222	48.0
1453	establishment of ribosome localization	CDC5_Tunicamycin_overestimated_proper.txt	GO:0033753	12.0	0.00923671177222	48.0
1454	biosynthetic process	CDC5_Tunicamycin_overestimated_proper.txt	GO:0009058	157.0	0.00987116512826	2479.0
1455	ribosome localization	CDC5_Tunicamycin_overestimated_proper.txt	GO:0033750	12.0	0.0117073473822	49.0
1456	organic substance biosynthetic process	CDC5_Tunicamycin_overestimated_proper.txt	GO:1901576	155.0	0.0124373070122	2446.0
1457	nucleic acid phosphodiester bond hydrolysis	CDC5_Tunicamycin_overestimated_proper.txt	GO:0090305	32.0	0.0169356658342	280.0
1458	cellular protein metabolic process	CDC5_Tunicamycin_overestimated_proper.txt	GO:0044267	117.0	0.0201851945001	1713.0
1459	tRNA methylation	CDC5_Tunicamycin_overestimated_proper.txt	GO:0030488	8.0	0.0238009704214	22.0
1460	rRNA 3'-end processing	CDC5_Tunicamycin_overestimated_proper.txt	GO:0031125	8.0	0.034978962176	23.0
1461	organonitrogen compound metabolic process	CDC5_Tunicamycin_overestimated_proper.txt	GO:1901564	99.0	0.048591229064	1404.0
1462	pentose-phosphate shunt	YPK3_Salt_underestimated_proper.txt	GO:0006098	5.0	0.000907827179329	16.0
1463	glyceraldehyde-3-phosphate metabolic process	YPK3_Salt_underestimated_proper.txt	GO:0019682	5.0	0.000907827179329	16.0
1464	nicotinamide nucleotide metabolic process	YPK3_Salt_underestimated_proper.txt	GO:0046496	8.0	0.00299267013574	85.0
1465	pyridine nucleotide metabolic process	YPK3_Salt_underestimated_proper.txt	GO:0019362	8.0	0.00327719853026	86.0
1466	NADP metabolic process	YPK3_Salt_underestimated_proper.txt	GO:0006739	5.0	0.00837242847619	24.0
1467	pyridine-containing compound metabolic process	YPK3_Salt_underestimated_proper.txt	GO:0072524	8.0	0.00897301676364	98.0
1468	oxidoreduction coenzyme metabolic process	YPK3_Salt_underestimated_proper.txt	GO:0006733	8.0	0.0112943352384	101.0
1469	glucose 6-phosphate metabolic process	YPK3_Salt_underestimated_proper.txt	GO:0051156	5.0	0.0188433236092	28.0
1470	oxidation-reduction process	YPK3_Salt_underestimated_proper.txt	GO:0055114	15.0	0.0243995828279	456.0
1471	oxidation-reduction process	YPK1_Menadione_underestimated_proper.txt	GO:0055114	154.0	2.50475871994e-11	456.0
1472	response to oxidative stress	YPK1_Menadione_underestimated_proper.txt	GO:0006979	60.0	3.90597072748e-10	124.0
1473	cellular response to oxidative stress	YPK1_Menadione_underestimated_proper.txt	GO:0034599	56.0	1.94035965673e-09	115.0
1474	iron-sulfur cluster assembly	YPK1_Menadione_underestimated_proper.txt	GO:0016226	19.0	8.26285798554e-08	22.0
1475	metallo-sulfur cluster assembly	YPK1_Menadione_underestimated_proper.txt	GO:0031163	19.0	8.26285798554e-08	22.0
1476	protein complex assembly	YPK1_Menadione_underestimated_proper.txt	GO:0006461	110.0	1.1442107093e-07	321.0
1477	protein complex biogenesis	YPK1_Menadione_underestimated_proper.txt	GO:0070271	112.0	2.27390996453e-07	332.0
1478	protein complex subunit organization	YPK1_Menadione_underestimated_proper.txt	GO:0071822	122.0	2.37905331289e-07	372.0
1479	response to chemical	YPK1_Menadione_underestimated_proper.txt	GO:0042221	160.0	2.96378081124e-07	530.0
1480	single-organism metabolic process	YPK1_Menadione_underestimated_proper.txt	GO:0044710	366.0	3.06736911736e-07	1470.0
1481	generation of precursor metabolites and energy	YPK1_Menadione_underestimated_proper.txt	GO:0006091	77.0	6.58779622535e-07	203.0
1482	proteolysis involved in cellular protein catabolic process	YPK1_Menadione_underestimated_proper.txt	GO:0051603	89.0	1.15542590817e-06	250.0
1483	cellular protein catabolic process	YPK1_Menadione_underestimated_proper.txt	GO:0044257	94.0	1.40506763979e-06	270.0
1484	cellular response to chemical stimulus	YPK1_Menadione_underestimated_proper.txt	GO:0070887	123.0	1.62960430839e-06	386.0
1485	ubiquitin-dependent protein catabolic process	YPK1_Menadione_underestimated_proper.txt	GO:0006511	83.0	1.75799555573e-06	229.0
1486	modification-dependent protein catabolic process	YPK1_Menadione_underestimated_proper.txt	GO:0019941	83.0	1.75799555573e-06	229.0
1487	cellular protein complex assembly	YPK1_Menadione_underestimated_proper.txt	GO:0043623	95.0	1.8154687102e-06	275.0
1488	proteasome-mediated ubiquitin-dependent protein catabolic process	YPK1_Menadione_underestimated_proper.txt	GO:0043161	62.0	2.02061498587e-06	153.0
1489	cellular component organization	YPK1_Menadione_underestimated_proper.txt	GO:0016043	486.0	2.75308348966e-06	2086.0
1490	proteasomal protein catabolic process	YPK1_Menadione_underestimated_proper.txt	GO:0010498	62.0	5.14981026389e-06	156.0
1491	modification-dependent macromolecule catabolic process	YPK1_Menadione_underestimated_proper.txt	GO:0043632	86.0	2.07853829815e-05	251.0
1492	proteasome assembly	YPK1_Menadione_underestimated_proper.txt	GO:0043248	23.0	2.11933809289e-05	36.0
1493	positive regulation of protein complex assembly	YPK1_Menadione_underestimated_proper.txt	GO:0031334	29.0	6.01569929639e-05	54.0
1494	nucleotide metabolic process	YPK1_Menadione_underestimated_proper.txt	GO:0009117	83.0	7.16970453362e-05	245.0
1495	nucleoside phosphate metabolic process	YPK1_Menadione_underestimated_proper.txt	GO:0006753	84.0	7.29384786635e-05	249.0
1496	single-organism cellular process	YPK1_Menadione_underestimated_proper.txt	GO:0044763	642.0	8.12236735522e-05	2937.0
1497	protein catabolic process	YPK1_Menadione_underestimated_proper.txt	GO:0030163	94.0	9.42528917813e-05	290.0
1498	energy derivation by oxidation of organic compounds	YPK1_Menadione_underestimated_proper.txt	GO:0015980	61.0	0.000107384701879	163.0
1499	catabolic process	YPK1_Menadione_underestimated_proper.txt	GO:0009056	198.0	0.000133937132687	741.0
1500	cellular oxidant detoxification	YPK1_Menadione_underestimated_proper.txt	GO:0098869	22.0	0.000152922709776	36.0
1501	proteasomal ubiquitin-independent protein catabolic process	YPK1_Menadione_underestimated_proper.txt	GO:0010499	13.0	0.000153881409845	15.0
1502	response to inorganic substance	YPK1_Menadione_underestimated_proper.txt	GO:0010035	32.0	0.00016891864821	65.0
1503	single-organism organelle organization	YPK1_Menadione_underestimated_proper.txt	GO:1902589	155.0	0.000188718225038	552.0
1504	actin filament organization	YPK1_Menadione_underestimated_proper.txt	GO:0007015	36.0	0.00020037269121	78.0
1505	biological regulation	YPK1_Menadione_underestimated_proper.txt	GO:0065007	466.0	0.000213057118153	2039.0
1506	detoxification	YPK1_Menadione_underestimated_proper.txt	GO:0098754	22.0	0.00030950358681	37.0
1507	cellular detoxification	YPK1_Menadione_underestimated_proper.txt	GO:1990748	22.0	0.00030950358681	37.0
1508	organic substance catabolic process	YPK1_Menadione_underestimated_proper.txt	GO:1901575	195.0	0.00031982419785	735.0
1509	single-organism process	YPK1_Menadione_underestimated_proper.txt	GO:0044699	727.0	0.000410784984207	3416.0
1510	cellular response to stress	YPK1_Menadione_underestimated_proper.txt	GO:0033554	191.0	0.000511423572849	721.0
1511	response to stress	YPK1_Menadione_underestimated_proper.txt	GO:0006950	212.0	0.000567462688752	818.0
1512	organelle organization	YPK1_Menadione_underestimated_proper.txt	GO:0006996	351.0	0.000751444111683	1483.0
1513	regulation of protein complex assembly	YPK1_Menadione_underestimated_proper.txt	GO:0043254	40.0	0.000813851752027	95.0
1514	positive regulation of cellular component biogenesis	YPK1_Menadione_underestimated_proper.txt	GO:0044089	34.0	0.000824471715784	75.0
1515	supramolecular fiber organization	YPK1_Menadione_underestimated_proper.txt	GO:0097435	45.0	0.00134250242864	114.0
1516	regulation of biological process	YPK1_Menadione_underestimated_proper.txt	GO:0050789	391.0	0.00185540193182	1692.0
1517	actin filament-based process	YPK1_Menadione_underestimated_proper.txt	GO:0030029	50.0	0.00229246209101	134.0
1518	nucleobase-containing small molecule metabolic process	YPK1_Menadione_underestimated_proper.txt	GO:0055086	85.0	0.00237384675427	271.0
1519	positive regulation of cellular component organization	YPK1_Menadione_underestimated_proper.txt	GO:0051130	54.0	0.00237533343106	149.0
1520	cellular catabolic process	YPK1_Menadione_underestimated_proper.txt	GO:0044248	169.0	0.00264983204774	636.0
1521	proteasome regulatory particle assembly	YPK1_Menadione_underestimated_proper.txt	GO:0070682	10.0	0.00289423208986	11.0
1522	regulation of cellular process	YPK1_Menadione_underestimated_proper.txt	GO:0050794	378.0	0.00300929514368	1634.0
1523	cofactor metabolic process	YPK1_Menadione_underestimated_proper.txt	GO:0051186	75.0	0.00313603337091	232.0
1524	regulation of supramolecular fiber organization	YPK1_Menadione_underestimated_proper.txt	GO:1902903	27.0	0.00344483780972	56.0
1525	cellular component assembly	YPK1_Menadione_underestimated_proper.txt	GO:0022607	215.0	0.00351642290362	850.0
1526	positive regulation of supramolecular fiber organization	YPK1_Menadione_underestimated_proper.txt	GO:1902905	22.0	0.00367096101354	41.0
1527	ribose phosphate metabolic process	YPK1_Menadione_underestimated_proper.txt	GO:0019693	62.0	0.00416695138464	182.0
1528	regulation of actin polymerization or depolymerization	YPK1_Menadione_underestimated_proper.txt	GO:0008064	18.0	0.00421312679596	30.0
1529	regulation of actin filament length	YPK1_Menadione_underestimated_proper.txt	GO:0030832	18.0	0.00421312679596	30.0
1530	actin cytoskeleton organization	YPK1_Menadione_underestimated_proper.txt	GO:0030036	48.0	0.0042829168542	129.0
1531	actin polymerization or depolymerization	YPK1_Menadione_underestimated_proper.txt	GO:0008154	19.0	0.00503933358247	33.0
1532	cellular macromolecule catabolic process	YPK1_Menadione_underestimated_proper.txt	GO:0044265	117.0	0.00589633971894	412.0
1533	response to toxic substance	YPK1_Menadione_underestimated_proper.txt	GO:0009636	23.0	0.00637157850689	45.0
1534	small molecule metabolic process	YPK1_Menadione_underestimated_proper.txt	GO:0044281	205.0	0.00659873659125	810.0
1535	regulation of protein polymerization	YPK1_Menadione_underestimated_proper.txt	GO:0032271	22.0	0.0106430251259	43.0
1536	cellular respiration	YPK1_Menadione_underestimated_proper.txt	GO:0045333	42.0	0.0125720211888	111.0
1537	actin filament polymerization	YPK1_Menadione_underestimated_proper.txt	GO:0030041	17.0	0.013506865702	29.0
1538	regulation of actin filament polymerization	YPK1_Menadione_underestimated_proper.txt	GO:0030833	17.0	0.013506865702	29.0
1539	sulfur compound metabolic process	YPK1_Menadione_underestimated_proper.txt	GO:0006790	51.0	0.0174553168174	146.0
1540	response to abiotic stimulus	YPK1_Menadione_underestimated_proper.txt	GO:0009628	61.0	0.0175201885096	185.0
1541	actin cortical patch organization	YPK1_Menadione_underestimated_proper.txt	GO:0044396	13.0	0.0183093444936	19.0
1542	purine ribonucleotide metabolic process	YPK1_Menadione_underestimated_proper.txt	GO:0009150	51.0	0.0218929609694	147.0
1543	regulation of cellular component organization	YPK1_Menadione_underestimated_proper.txt	GO:0051128	121.0	0.0258071956087	441.0
1544	positive regulation of protein polymerization	YPK1_Menadione_underestimated_proper.txt	GO:0032273	18.0	0.0280832661883	33.0
1545	macromolecule catabolic process	YPK1_Menadione_underestimated_proper.txt	GO:0009057	124.0	0.0281636772549	455.0
1546	vesicle organization	YPK1_Menadione_underestimated_proper.txt	GO:0016050	69.0	0.0296648135287	220.0
1547	purine ribonucleoside metabolic process	YPK1_Menadione_underestimated_proper.txt	GO:0046128	48.0	0.0307633331959	137.0
1548	phosphate-containing compound metabolic process	YPK1_Menadione_underestimated_proper.txt	GO:0006796	198.0	0.0340517029803	795.0
1549	ATP metabolic process	YPK1_Menadione_underestimated_proper.txt	GO:0046034	39.0	0.0368715308962	104.0
1550	purine nucleoside metabolic process	YPK1_Menadione_underestimated_proper.txt	GO:0042278	48.0	0.0386411656328	138.0
1551	phosphorus metabolic process	YPK1_Menadione_underestimated_proper.txt	GO:0006793	204.0	0.0401123618622	825.0
1552	regulation of cellular component biogenesis	YPK1_Menadione_underestimated_proper.txt	GO:0044087	53.0	0.0440179182157	158.0
1553	ribonucleotide metabolic process	YPK1_Menadione_underestimated_proper.txt	GO:0009259	54.0	0.0446728503461	162.0
1554	phosphatidylinositol biosynthetic process	HOG1_Fluconazole_overestimated_proper.txt	GO:0006661	10.0	0.0010455742715	44.0
1555	establishment of localization in cell	HOG1_Fluconazole_overestimated_proper.txt	GO:0051649	42.0	0.00202424896848	699.0
1556	GPI anchor biosynthetic process	HOG1_Fluconazole_overestimated_proper.txt	GO:0006506	8.0	0.00488684276415	30.0
1557	glycerophospholipid biosynthetic process	HOG1_Fluconazole_overestimated_proper.txt	GO:0046474	12.0	0.00645634753854	79.0
1558	GPI anchor metabolic process	HOG1_Fluconazole_overestimated_proper.txt	GO:0006505	8.0	0.00837857359056	32.0
1559	glycerolipid biosynthetic process	HOG1_Fluconazole_overestimated_proper.txt	GO:0045017	12.0	0.00972529408763	82.0
1560	glycolipid biosynthetic process	HOG1_Fluconazole_overestimated_proper.txt	GO:0009247	8.0	0.0137983025693	34.0
1561	intracellular transport	HOG1_Fluconazole_overestimated_proper.txt	GO:0046907	38.0	0.0157776890266	648.0
1562	glycolipid metabolic process	HOG1_Fluconazole_overestimated_proper.txt	GO:0006664	8.0	0.0273488099606	37.0
1563	liposaccharide metabolic process	HOG1_Fluconazole_overestimated_proper.txt	GO:1903509	8.0	0.0273488099606	37.0
1564	cellular localization	HOG1_Fluconazole_overestimated_proper.txt	GO:0051641	46.0	0.0383972316193	892.0
1565	nucleic acid metabolic process	KSP1_Tunicamycin_overestimated_proper.txt	GO:0090304	33.0	0.035745190637	1798.0
1566	tRNA modification	KSP1_Tunicamycin_overestimated_proper.txt	GO:0006400	7.0	0.0382455365694	78.0
1567	RNA metabolic process	KSP1_Tunicamycin_overestimated_proper.txt	GO:0016070	30.0	0.0470563477387	1545.0
1568	oxidation-reduction process	HOG1_Menadione_overestimated_proper.txt	GO:0055114	78.0	3.52157820963e-15	456.0
1569	response to oxidative stress	HOG1_Menadione_overestimated_proper.txt	GO:0006979	35.0	9.04431027074e-12	124.0
1570	cellular response to oxidative stress	HOG1_Menadione_overestimated_proper.txt	GO:0034599	32.0	2.45623770512e-10	115.0
1571	protein refolding	HOG1_Menadione_overestimated_proper.txt	GO:0042026	13.0	9.53098875619e-10	17.0
1572	protein folding	HOG1_Menadione_overestimated_proper.txt	GO:0006457	30.0	2.84432671607e-09	110.0
1573	response to chemical	HOG1_Menadione_overestimated_proper.txt	GO:0042221	72.0	2.57325091264e-08	530.0
1574	single-organism metabolic process	HOG1_Menadione_overestimated_proper.txt	GO:0044710	140.0	5.40511063749e-07	1470.0
1575	sulfur compound metabolic process	HOG1_Menadione_overestimated_proper.txt	GO:0006790	28.0	0.000113548835813	146.0
1576	response to heat	HOG1_Menadione_overestimated_proper.txt	GO:0009408	19.0	0.000176443852327	74.0
1577	cofactor metabolic process	HOG1_Menadione_overestimated_proper.txt	GO:0051186	36.0	0.000359706399867	232.0
1578	oxidoreduction coenzyme metabolic process	HOG1_Menadione_overestimated_proper.txt	GO:0006733	22.0	0.000366771535257	101.0
1579	response to temperature stimulus	HOG1_Menadione_overestimated_proper.txt	GO:0009266	19.0	0.000552552058502	79.0
1580	cellular aldehyde metabolic process	HOG1_Menadione_overestimated_proper.txt	GO:0006081	15.0	0.000960691310305	52.0
1581	pyridine-containing compound metabolic process	HOG1_Menadione_overestimated_proper.txt	GO:0072524	21.0	0.000987893001054	98.0
1582	response to abiotic stimulus	HOG1_Menadione_overestimated_proper.txt	GO:0009628	30.0	0.00179535007567	185.0
1583	pyridine nucleotide metabolic process	HOG1_Menadione_overestimated_proper.txt	GO:0019362	19.0	0.00232036386076	86.0
1584	cellular oxidant detoxification	HOG1_Menadione_overestimated_proper.txt	GO:0098869	12.0	0.00292549362713	36.0
1585	detoxification	HOG1_Menadione_overestimated_proper.txt	GO:0098754	12.0	0.00410001578229	37.0
1586	cellular detoxification	HOG1_Menadione_overestimated_proper.txt	GO:1990748	12.0	0.00410001578229	37.0
1587	glutathione metabolic process	HOG1_Menadione_overestimated_proper.txt	GO:0006749	9.0	0.00414719677693	20.0
1588	response to stress	HOG1_Menadione_overestimated_proper.txt	GO:0006950	81.0	0.00519197914545	818.0
1589	misfolded or incompletely synthesized protein catabolic process	HOG1_Menadione_overestimated_proper.txt	GO:0006515	11.0	0.00617733967105	32.0
1590	response to toxic substance	HOG1_Menadione_overestimated_proper.txt	GO:0009636	13.0	0.00631141906428	45.0
1591	proteolysis involved in cellular protein catabolic process	HOG1_Menadione_overestimated_proper.txt	GO:0051603	35.0	0.00705455612581	250.0
1592	nicotinamide nucleotide metabolic process	HOG1_Menadione_overestimated_proper.txt	GO:0046496	18.0	0.00906310302144	85.0
1593	iron-sulfur cluster assembly	HOG1_Menadione_overestimated_proper.txt	GO:0016226	9.0	0.011025370383	22.0
1594	metallo-sulfur cluster assembly	HOG1_Menadione_overestimated_proper.txt	GO:0031163	9.0	0.011025370383	22.0
1595	cellular response to chemical stimulus	HOG1_Menadione_overestimated_proper.txt	GO:0070887	46.0	0.0155763619413	386.0
1596	response to inorganic substance	HOG1_Menadione_overestimated_proper.txt	GO:0010035	15.0	0.021749185241	65.0
1597	NADP metabolic process	HOG1_Menadione_overestimated_proper.txt	GO:0006739	9.0	0.0260282017085	24.0
1598	cellular protein catabolic process	HOG1_Menadione_overestimated_proper.txt	GO:0044257	35.0	0.0420878554662	270.0
1599	cellular amino acid metabolic process	YPK1_Azetidine_overestimated_proper.txt	GO:0006520	21.0	4.32039883702e-09	255.0
1600	cellular amino acid biosynthetic process	YPK1_Azetidine_overestimated_proper.txt	GO:0008652	16.0	1.40999945153e-08	135.0
1601	alpha-amino acid metabolic process	YPK1_Azetidine_overestimated_proper.txt	GO:1901605	17.0	2.43156584072e-07	189.0
1602	oxoacid metabolic process	YPK1_Azetidine_overestimated_proper.txt	GO:0043436	24.0	8.26094267663e-07	450.0
1603	organic acid metabolic process	YPK1_Azetidine_overestimated_proper.txt	GO:0006082	24.0	8.65243387543e-07	451.0
1604	alpha-amino acid biosynthetic process	YPK1_Azetidine_overestimated_proper.txt	GO:1901607	14.0	1.05360105166e-06	127.0
1605	carboxylic acid metabolic process	YPK1_Azetidine_overestimated_proper.txt	GO:0019752	23.0	2.46365179552e-06	433.0
1606	organic acid biosynthetic process	YPK1_Azetidine_overestimated_proper.txt	GO:0016053	16.0	5.7512174162e-06	200.0
1607	carboxylic acid biosynthetic process	YPK1_Azetidine_overestimated_proper.txt	GO:0046394	16.0	5.7512174162e-06	200.0
1608	protein folding	YPK1_Azetidine_overestimated_proper.txt	GO:0006457	12.0	2.71588003659e-05	110.0
1609	small molecule metabolic process	YPK1_Azetidine_overestimated_proper.txt	GO:0044281	29.0	7.28549202491e-05	810.0
1610	protein refolding	YPK1_Azetidine_overestimated_proper.txt	GO:0042026	6.0	0.000148341657197	17.0
1611	single-organism metabolic process	YPK1_Azetidine_overestimated_proper.txt	GO:0044710	39.0	0.000271714417352	1470.0
1612	single-organism biosynthetic process	YPK1_Azetidine_overestimated_proper.txt	GO:0044711	26.0	0.000336364824692	706.0
1613	small molecule biosynthetic process	YPK1_Azetidine_overestimated_proper.txt	GO:0044283	17.0	0.00159291375043	336.0
1614	aromatic amino acid family biosynthetic process	YPK1_Azetidine_overestimated_proper.txt	GO:0009073	5.0	0.00323118820383	15.0
1615	lysine biosynthetic process via aminoadipic acid	YPK1_Azetidine_overestimated_proper.txt	GO:0019878	4.0	0.0320152116909	11.0
1616	glycosylation	YPK1_Menadione_overestimated_proper.txt	GO:0070085	39.0	4.74959528966e-07	87.0
1617	glycoprotein metabolic process	YPK1_Menadione_overestimated_proper.txt	GO:0009100	38.0	5.95738016209e-07	84.0
1618	glycoprotein biosynthetic process	YPK1_Menadione_overestimated_proper.txt	GO:0009101	37.0	7.42669673353e-07	81.0
1619	protein glycosylation	YPK1_Menadione_overestimated_proper.txt	GO:0006486	36.0	9.19588008039e-07	78.0
1620	macromolecule glycosylation	YPK1_Menadione_overestimated_proper.txt	GO:0043413	36.0	9.19588008039e-07	78.0
1621	carbohydrate derivative biosynthetic process	YPK1_Menadione_overestimated_proper.txt	GO:1901137	75.0	4.89266504202e-06	242.0
1622	single-organism process	YPK1_Menadione_overestimated_proper.txt	GO:0044699	618.0	4.91004984989e-06	3416.0
1623	protein targeting to nucleus	YPK1_Menadione_overestimated_proper.txt	GO:0044744	31.0	1.01378206525e-05	66.0
1624	protein import into nucleus	YPK1_Menadione_overestimated_proper.txt	GO:0006606	30.0	3.11876221883e-05	65.0
1625	nuclear import	YPK1_Menadione_overestimated_proper.txt	GO:0051170	31.0	3.89535847249e-05	69.0
1626	protein N-linked glycosylation	YPK1_Menadione_overestimated_proper.txt	GO:0006487	25.0	4.53025329039e-05	49.0
1627	single-organism nuclear import	YPK1_Menadione_overestimated_proper.txt	GO:1902593	30.0	0.000114639553996	68.0
1628	protein localization to nucleus	YPK1_Menadione_overestimated_proper.txt	GO:0034504	32.0	0.00130103451149	82.0
1629	lipid metabolic process	YPK1_Menadione_overestimated_proper.txt	GO:0006629	89.0	0.00161361267454	342.0
1630	cellular lipid metabolic process	YPK1_Menadione_overestimated_proper.txt	GO:0044255	84.0	0.00178846888527	318.0
1631	divalent metal ion transport	YPK1_Menadione_overestimated_proper.txt	GO:0070838	19.0	0.00429120744042	38.0
1632	localization	YPK1_Menadione_overestimated_proper.txt	GO:0051179	307.0	0.00713953448093	1575.0
1633	divalent inorganic cation transport	YPK1_Menadione_overestimated_proper.txt	GO:0072511	19.0	0.0071441974598	39.0
1634	lipid biosynthetic process	YPK1_Menadione_overestimated_proper.txt	GO:0008610	60.0	0.00989924455853	213.0
1635	transport	YPK1_Menadione_overestimated_proper.txt	GO:0006810	271.0	0.010609716626	1368.0
1636	single-organism cellular process	YPK1_Menadione_overestimated_proper.txt	GO:0044763	525.0	0.014358330711	2937.0
1637	membrane lipid metabolic process	YPK1_Menadione_overestimated_proper.txt	GO:0006643	30.0	0.0152146885249	82.0
1638	nitrogen compound transport	YPK1_Menadione_overestimated_proper.txt	GO:0071705	78.0	0.0215756590125	306.0
1639	establishment of localization	YPK1_Menadione_overestimated_proper.txt	GO:0051234	278.0	0.0259072352385	1423.0
1640	membrane lipid biosynthetic process	YPK1_Menadione_overestimated_proper.txt	GO:0046467	26.0	0.0272644674108	68.0
1641	vacuolar transport	WT3_Menadione_overestimated_proper.txt	GO:0007034	24.0	1.23753787635e-05	179.0
1642	protein targeting to vacuole	WT3_Menadione_overestimated_proper.txt	GO:0006623	17.0	0.00177045714924	122.0
1643	establishment of protein localization to vacuole	WT3_Menadione_overestimated_proper.txt	GO:0072666	17.0	0.00177045714924	122.0
1644	protein localization to vacuole	WT3_Menadione_overestimated_proper.txt	GO:0072665	17.0	0.00283868884133	126.0
1645	cellular macromolecule localization	WT3_Menadione_overestimated_proper.txt	GO:0070727	40.0	0.0196432967226	587.0
1646	regulation of biological process	WT3_Menadione_overestimated_proper.txt	GO:0050789	84.0	0.0226834875798	1692.0
1647	biological regulation	WT3_Menadione_overestimated_proper.txt	GO:0065007	96.0	0.0283737504708	2039.0
1648	Golgi vesicle transport	WT3_Menadione_overestimated_proper.txt	GO:0048193	20.0	0.0371999965646	201.0
1649	cellular protein localization	WT3_Menadione_overestimated_proper.txt	GO:0034613	38.0	0.0385614147614	559.0
1650	respiratory electron transport chain	HOG1_Azetidine_overestimated_proper.txt	GO:0022904	5.0	0.0187970203134	45.0
1651	electron transport chain	HOG1_Azetidine_overestimated_proper.txt	GO:0022900	5.0	0.0260388163116	48.0
1652	biological regulation	CDC7_Salt_overestimated_proper.txt	GO:0065007	210.0	8.1857765085e-10	2039.0
1653	regulation of biological process	CDC7_Salt_overestimated_proper.txt	GO:0050789	181.0	7.02954952958e-09	1692.0
1654	regulation of cellular process	CDC7_Salt_overestimated_proper.txt	GO:0050794	175.0	2.201724332e-08	1634.0
1655	positive regulation of biological process	CDC7_Salt_overestimated_proper.txt	GO:0048518	90.0	1.25429675258e-06	682.0
1656	positive regulation of cellular process	CDC7_Salt_overestimated_proper.txt	GO:0048522	87.0	5.06167155183e-06	667.0
1657	positive regulation of nucleobase-containing compound metabolic process	CDC7_Salt_overestimated_proper.txt	GO:0045935	60.0	6.74873545057e-06	390.0
1658	positive regulation of metabolic process	CDC7_Salt_overestimated_proper.txt	GO:0009893	74.0	6.92082668508e-06	532.0
1659	regulation of macromolecule metabolic process	CDC7_Salt_overestimated_proper.txt	GO:0060255	126.0	7.36165709226e-06	1122.0
1660	regulation of metabolic process	CDC7_Salt_overestimated_proper.txt	GO:0019222	130.0	1.20595561209e-05	1179.0
1661	positive regulation of cellular metabolic process	CDC7_Salt_overestimated_proper.txt	GO:0031325	72.0	2.71345244251e-05	527.0
1662	positive regulation of macromolecule metabolic process	CDC7_Salt_overestimated_proper.txt	GO:0010604	70.0	3.21121601175e-05	508.0
1663	regulation of cellular metabolic process	CDC7_Salt_overestimated_proper.txt	GO:0031323	126.0	3.73879069217e-05	1150.0
1664	regulation of primary metabolic process	CDC7_Salt_overestimated_proper.txt	GO:0080090	125.0	5.01078547161e-05	1143.0
1665	positive regulation of RNA metabolic process	CDC7_Salt_overestimated_proper.txt	GO:0051254	55.0	6.36855180648e-05	363.0
1666	positive regulation of transcription, DNA-templated	CDC7_Salt_overestimated_proper.txt	GO:0045893	54.0	6.91036533909e-05	354.0
1667	positive regulation of RNA biosynthetic process	CDC7_Salt_overestimated_proper.txt	GO:1902680	54.0	6.91036533909e-05	354.0
1668	positive regulation of nucleic acid-templated transcription	CDC7_Salt_overestimated_proper.txt	GO:1903508	54.0	6.91036533909e-05	354.0
1669	positive regulation of nitrogen compound metabolic process	CDC7_Salt_overestimated_proper.txt	GO:0051173	61.0	0.000157308321816	433.0
1670	transcription from RNA polymerase II promoter	CDC7_Salt_overestimated_proper.txt	GO:0006366	70.0	0.000193888373845	530.0
1671	regulation of transcription from RNA polymerase II promoter	CDC7_Salt_overestimated_proper.txt	GO:0006357	64.0	0.00021933613158	468.0
1672	regulation of gene expression	CDC7_Salt_overestimated_proper.txt	GO:0010468	102.0	0.000224373976969	893.0
1673	positive regulation of gene expression	CDC7_Salt_overestimated_proper.txt	GO:0010628	57.0	0.000290923338282	399.0
1674	positive regulation of biosynthetic process	CDC7_Salt_overestimated_proper.txt	GO:0009891	59.0	0.000333121776196	421.0
1675	positive regulation of cellular biosynthetic process	CDC7_Salt_overestimated_proper.txt	GO:0031328	59.0	0.000333121776196	421.0
1676	positive regulation of transcription from RNA polymerase II promoter	CDC7_Salt_overestimated_proper.txt	GO:0045944	48.0	0.00037060400715	312.0
1677	positive regulation of macromolecule biosynthetic process	CDC7_Salt_overestimated_proper.txt	GO:0010557	57.0	0.000415554230529	403.0
1678	regulation of transcription, DNA-templated	CDC7_Salt_overestimated_proper.txt	GO:0006355	86.0	0.0011797071377	734.0
1679	regulation of cellular macromolecule biosynthetic process	CDC7_Salt_overestimated_proper.txt	GO:2000112	101.0	0.00125707463137	911.0
1680	regulation of nucleic acid-templated transcription	CDC7_Salt_overestimated_proper.txt	GO:1903506	86.0	0.00181205381612	741.0
1681	regulation of RNA biosynthetic process	CDC7_Salt_overestimated_proper.txt	GO:2001141	86.0	0.00181205381612	741.0
1682	regulation of RNA metabolic process	CDC7_Salt_overestimated_proper.txt	GO:0051252	88.0	0.00190196497726	765.0
1683	regulation of macromolecule biosynthetic process	CDC7_Salt_overestimated_proper.txt	GO:0010556	101.0	0.00270059378094	925.0
1684	transcription, DNA-templated	CDC7_Salt_overestimated_proper.txt	GO:0006351	89.0	0.00347749515284	787.0
1685	negative regulation of cellular amide metabolic process	CDC7_Salt_overestimated_proper.txt	GO:0034249	13.0	0.00393921762803	38.0
1686	regulation of nitrogen compound metabolic process	CDC7_Salt_overestimated_proper.txt	GO:0051171	105.0	0.00402633030762	981.0
1687	cell wall organization or biogenesis	CDC7_Salt_overestimated_proper.txt	GO:0071554	42.0	0.00432971837999	278.0
1688	regulation of cellular biosynthetic process	CDC7_Salt_overestimated_proper.txt	GO:0031326	103.0	0.00453049069941	959.0
1689	regulation of nucleobase-containing compound metabolic process	CDC7_Salt_overestimated_proper.txt	GO:0019219	93.0	0.0048010513805	840.0
1690	nucleic acid-templated transcription	CDC7_Salt_overestimated_proper.txt	GO:0097659	89.0	0.00488630030903	793.0
1691	regulation of biosynthetic process	CDC7_Salt_overestimated_proper.txt	GO:0009889	103.0	0.005019291711	961.0
1692	RNA biosynthetic process	CDC7_Salt_overestimated_proper.txt	GO:0032774	89.0	0.00611149002359	797.0
1693	negative regulation of translation	CDC7_Salt_overestimated_proper.txt	GO:0017148	12.0	0.0103090017301	35.0
1694	regulation of developmental process	CDC7_Salt_overestimated_proper.txt	GO:0050793	15.0	0.0113512120364	54.0
1695	regulation of ER to Golgi vesicle-mediated transport	CDC7_Salt_overestimated_proper.txt	GO:0060628	6.0	0.0137003833568	8.0
1696	nucleobase-containing compound biosynthetic process	CDC7_Salt_overestimated_proper.txt	GO:0034654	107.0	0.0155662737236	1033.0
1697	heterocycle biosynthetic process	CDC7_Salt_overestimated_proper.txt	GO:0018130	114.0	0.0162195915722	1121.0
1698	negative regulation of cellular protein metabolic process	CDC7_Salt_overestimated_proper.txt	GO:0032269	20.0	0.0196160748429	93.0
1699	negative regulation of protein metabolic process	CDC7_Salt_overestimated_proper.txt	GO:0051248	20.0	0.0196160748429	93.0
1700	aromatic compound biosynthetic process	CDC7_Salt_overestimated_proper.txt	GO:0019438	112.0	0.020371416611	1101.0
1701	single-organism cellular process	CDC7_Salt_overestimated_proper.txt	GO:0044763	246.0	0.0236452225114	2937.0
1702	organic cyclic compound biosynthetic process	CDC7_Salt_overestimated_proper.txt	GO:1901362	116.0	0.0406301967052	1167.0
1703	S-adenosylmethionine metabolic process	CDC7_Salt_overestimated_proper.txt	GO:0046500	5.0	0.0455924569806	6.0
1704	cell separation after cytokinesis	CDC15_Rapamycin_overestimated_proper.txt	GO:0000920	3.0	0.041967205924	20.0
1705	sulfur amino acid metabolic process	TPK123_Heatshock_underestimated_proper.txt	GO:0000096	11.0	1.18067309862e-05	50.0
1706	sulfur amino acid biosynthetic process	TPK123_Heatshock_underestimated_proper.txt	GO:0000097	10.0	2.2316163087e-05	41.0
1707	methionine biosynthetic process	TPK123_Heatshock_underestimated_proper.txt	GO:0009086	9.0	0.000234486898427	39.0
1708	methionine metabolic process	TPK123_Heatshock_underestimated_proper.txt	GO:0006555	9.0	0.0007218422134	44.0
1709	cysteine biosynthetic process	TPK123_Heatshock_underestimated_proper.txt	GO:0019344	6.0	0.00074084653179	14.0
1710	sulfate assimilation	TPK123_Heatshock_underestimated_proper.txt	GO:0000103	5.0	0.0034424243545	10.0
1711	cysteine metabolic process	TPK123_Heatshock_underestimated_proper.txt	GO:0006534	6.0	0.00429029670047	18.0
1712	serine family amino acid biosynthetic process	TPK123_Heatshock_underestimated_proper.txt	GO:0009070	7.0	0.00443013596385	28.0
1713	serine family amino acid metabolic process	TPK123_Heatshock_underestimated_proper.txt	GO:0009069	8.0	0.00446063518684	40.0
1714	aspartate family amino acid biosynthetic process	TPK123_Heatshock_underestimated_proper.txt	GO:0009067	9.0	0.00538804055813	55.0
1715	oxidation-reduction process	TPK123_Heatshock_underestimated_proper.txt	GO:0055114	25.0	0.0106120978815	456.0
1716	hydrogen sulfide metabolic process	TPK123_Heatshock_underestimated_proper.txt	GO:0070813	4.0	0.0112167170589	6.0
1717	hydrogen sulfide biosynthetic process	TPK123_Heatshock_underestimated_proper.txt	GO:0070814	4.0	0.0112167170589	6.0
1718	sulfur compound biosynthetic process	TPK123_Heatshock_underestimated_proper.txt	GO:0044272	10.0	0.0268307213699	84.0
1719	carboxylic acid metabolic process	YPK1_Fluconazole_overestimated_proper.txt	GO:0019752	16.0	5.29223154012e-06	433.0
1720	oxoacid metabolic process	YPK1_Fluconazole_overestimated_proper.txt	GO:0043436	16.0	9.35151295931e-06	450.0
1721	organic acid metabolic process	YPK1_Fluconazole_overestimated_proper.txt	GO:0006082	16.0	9.66091144629e-06	451.0
1722	cellular amino acid metabolic process	YPK1_Fluconazole_overestimated_proper.txt	GO:0006520	12.0	8.79956568623e-05	255.0
1723	small molecule biosynthetic process	YPK1_Fluconazole_overestimated_proper.txt	GO:0044283	13.0	0.000198665706413	336.0
1724	cellular amino acid biosynthetic process	YPK1_Fluconazole_overestimated_proper.txt	GO:0008652	9.0	0.000398460337369	135.0
1725	organic acid biosynthetic process	YPK1_Fluconazole_overestimated_proper.txt	GO:0016053	10.0	0.00102254224444	200.0
1726	carboxylic acid biosynthetic process	YPK1_Fluconazole_overestimated_proper.txt	GO:0046394	10.0	0.00102254224444	200.0
1727	small molecule metabolic process	YPK1_Fluconazole_overestimated_proper.txt	GO:0044281	18.0	0.00104092253589	810.0
1728	alpha-amino acid biosynthetic process	YPK1_Fluconazole_overestimated_proper.txt	GO:1901607	8.0	0.00365711608947	127.0
1729	alpha-amino acid metabolic process	YPK1_Fluconazole_overestimated_proper.txt	GO:1901605	9.0	0.00709539645535	189.0
1730	organic acid biosynthetic process	KSP1_Tunicamycin_underestimated_proper.txt	GO:0016053	12.0	0.000305806672054	200.0
1731	carboxylic acid biosynthetic process	KSP1_Tunicamycin_underestimated_proper.txt	GO:0046394	12.0	0.000305806672054	200.0
1732	cellular amino acid metabolic process	KSP1_Tunicamycin_underestimated_proper.txt	GO:0006520	13.0	0.00053550665155	255.0
1733	cellular amino acid biosynthetic process	KSP1_Tunicamycin_underestimated_proper.txt	GO:0008652	10.0	0.000641517871158	135.0
1734	small molecule biosynthetic process	KSP1_Tunicamycin_underestimated_proper.txt	GO:0044283	14.0	0.00191980430735	336.0
1735	carboxylic acid metabolic process	KSP1_Tunicamycin_underestimated_proper.txt	GO:0019752	15.0	0.00715655954808	433.0
1736	oxoacid metabolic process	KSP1_Tunicamycin_underestimated_proper.txt	GO:0043436	15.0	0.0116591877014	450.0
1737	organic acid metabolic process	KSP1_Tunicamycin_underestimated_proper.txt	GO:0006082	15.0	0.0119880708705	451.0
1738	alpha-amino acid metabolic process	KSP1_Tunicamycin_underestimated_proper.txt	GO:1901605	10.0	0.0146508346064	189.0
1739	small molecule metabolic process	KSP1_Tunicamycin_underestimated_proper.txt	GO:0044281	20.0	0.0155970603314	810.0
1740	alpha-amino acid biosynthetic process	KSP1_Tunicamycin_underestimated_proper.txt	GO:1901607	8.0	0.0459581373274	127.0
1741	glycogen biosynthetic process	CDC15_Menadione_underestimated_proper.txt	GO:0005978	12.0	2.74288243007e-08	22.0
1742	oxidation-reduction process	CDC15_Menadione_underestimated_proper.txt	GO:0055114	49.0	2.22002950704e-07	456.0
1743	energy reserve metabolic process	CDC15_Menadione_underestimated_proper.txt	GO:0006112	14.0	2.30496032338e-07	37.0
1744	generation of precursor metabolites and energy	CDC15_Menadione_underestimated_proper.txt	GO:0006091	31.0	2.42451296047e-07	203.0
1745	cellular carbohydrate metabolic process	CDC15_Menadione_underestimated_proper.txt	GO:0044262	31.0	9.67805180348e-07	214.0
1746	glycogen metabolic process	CDC15_Menadione_underestimated_proper.txt	GO:0005977	13.0	1.53967925826e-06	35.0
1747	single-organism carbohydrate metabolic process	CDC15_Menadione_underestimated_proper.txt	GO:0044723	34.0	3.36116323373e-06	265.0
1748	phosphorus metabolic process	CDC15_Menadione_underestimated_proper.txt	GO:0006793	68.0	3.42263039308e-06	825.0
1749	energy derivation by oxidation of organic compounds	CDC15_Menadione_underestimated_proper.txt	GO:0015980	26.0	3.84794181258e-06	163.0
1750	carbohydrate metabolic process	CDC15_Menadione_underestimated_proper.txt	GO:0005975	37.0	5.71835504126e-06	313.0
1751	trehalose metabolic process	CDC15_Menadione_underestimated_proper.txt	GO:0005991	8.0	1.23428224624e-05	12.0
1752	phosphate-containing compound metabolic process	CDC15_Menadione_underestimated_proper.txt	GO:0006796	65.0	1.3506098863e-05	795.0
1753	cellular carbohydrate biosynthetic process	CDC15_Menadione_underestimated_proper.txt	GO:0034637	17.0	3.87920943026e-05	79.0
1754	response to abiotic stimulus	CDC15_Menadione_underestimated_proper.txt	GO:0009628	26.0	6.20672826559e-05	185.0
1755	single-organism metabolic process	CDC15_Menadione_underestimated_proper.txt	GO:0044710	96.0	0.000105582580236	1470.0
1756	response to inorganic substance	CDC15_Menadione_underestimated_proper.txt	GO:0010035	15.0	0.000111826333704	65.0
1757	nucleotide metabolic process	CDC15_Menadione_underestimated_proper.txt	GO:0009117	30.0	0.000115199985263	245.0
1758	carbohydrate biosynthetic process	CDC15_Menadione_underestimated_proper.txt	GO:0016051	20.0	0.000137686304975	118.0
1759	nucleoside phosphate metabolic process	CDC15_Menadione_underestimated_proper.txt	GO:0006753	30.0	0.000167855415877	249.0
1760	glucan biosynthetic process	CDC15_Menadione_underestimated_proper.txt	GO:0009250	12.0	0.000409605452303	44.0
1761	trehalose metabolism in response to stress	CDC15_Menadione_underestimated_proper.txt	GO:0070413	5.0	0.000493843715	5.0
1762	small molecule metabolic process	CDC15_Menadione_underestimated_proper.txt	GO:0044281	61.0	0.00112685073407	810.0
1763	nucleobase-containing small molecule metabolic process	CDC15_Menadione_underestimated_proper.txt	GO:0055086	30.0	0.00114660759445	271.0
1764	cellular response to chemical stimulus	CDC15_Menadione_underestimated_proper.txt	GO:0070887	37.0	0.00164444189643	386.0
1765	cellular response to oxygen-containing compound	CDC15_Menadione_underestimated_proper.txt	GO:1901701	13.0	0.0022160930912	60.0
1766	phosphorylation	CDC15_Menadione_underestimated_proper.txt	GO:0016310	37.0	0.00242848823272	392.0
1767	response to chemical	CDC15_Menadione_underestimated_proper.txt	GO:0042221	45.0	0.00253340354713	530.0
1768	single-organism biosynthetic process	CDC15_Menadione_underestimated_proper.txt	GO:0044711	54.0	0.00432982578644	706.0
1769	cellular polysaccharide biosynthetic process	CDC15_Menadione_underestimated_proper.txt	GO:0033692	13.0	0.00589711967229	65.0
1770	response to oxygen-containing compound	CDC15_Menadione_underestimated_proper.txt	GO:1901700	15.0	0.00648762855304	87.0
1771	response to stimulus	CDC15_Menadione_underestimated_proper.txt	GO:0050896	80.0	0.00705427262184	1244.0
1772	polysaccharide biosynthetic process	CDC15_Menadione_underestimated_proper.txt	GO:0000271	13.0	0.00708441129877	66.0
1773	cellular glucan metabolic process	CDC15_Menadione_underestimated_proper.txt	GO:0006073	13.0	0.00708441129877	66.0
1774	glucan metabolic process	CDC15_Menadione_underestimated_proper.txt	GO:0044042	13.0	0.00708441129877	66.0
1775	cellular response to acid chemical	CDC15_Menadione_underestimated_proper.txt	GO:0071229	8.0	0.00831884452967	23.0
1776	ribonucleoside triphosphate metabolic process	CDC15_Menadione_underestimated_proper.txt	GO:0009199	17.0	0.00914410017224	113.0
1777	oxidoreduction coenzyme metabolic process	CDC15_Menadione_underestimated_proper.txt	GO:0006733	16.0	0.00922112377205	101.0
1778	trehalose biosynthetic process	CDC15_Menadione_underestimated_proper.txt	GO:0005992	5.0	0.00967870850737	7.0
1779	response to water deprivation	CDC15_Menadione_underestimated_proper.txt	GO:0009414	5.0	0.00967870850737	7.0
1780	cellular response to water deprivation	CDC15_Menadione_underestimated_proper.txt	GO:0042631	5.0	0.00967870850737	7.0
1781	ribose phosphate metabolic process	CDC15_Menadione_underestimated_proper.txt	GO:0019693	22.0	0.0124321833984	182.0
1782	response to desiccation	CDC15_Menadione_underestimated_proper.txt	GO:0009269	4.0	0.0126044671023	4.0
1783	cellular response to desiccation	CDC15_Menadione_underestimated_proper.txt	GO:0071465	4.0	0.0126044671023	4.0
1784	organophosphate metabolic process	CDC15_Menadione_underestimated_proper.txt	GO:0019637	38.0	0.0153776296262	440.0
1785	response to stress	CDC15_Menadione_underestimated_proper.txt	GO:0006950	58.0	0.0187192569297	818.0
1786	response to acid chemical	CDC15_Menadione_underestimated_proper.txt	GO:0001101	8.0	0.0238489451401	26.0
1787	nucleoside triphosphate metabolic process	CDC15_Menadione_underestimated_proper.txt	GO:0009141	17.0	0.0239939229096	121.0
1788	disaccharide biosynthetic process	CDC15_Menadione_underestimated_proper.txt	GO:0046351	5.0	0.0249276390365	8.0
1789	purine ribonucleoside triphosphate metabolic process	CDC15_Menadione_underestimated_proper.txt	GO:0009205	16.0	0.0258383267294	109.0
1790	mitochondrial electron transport, ubiquinol to cytochrome c	CDC15_Menadione_underestimated_proper.txt	GO:0006122	6.0	0.0258695885101	13.0
1791	ribonucleotide metabolic process	CDC15_Menadione_underestimated_proper.txt	GO:0009259	20.0	0.0263655023464	162.0
1792	pyridine nucleotide metabolic process	CDC15_Menadione_underestimated_proper.txt	GO:0019362	14.0	0.0298946243052	86.0
1793	purine nucleoside triphosphate metabolic process	CDC15_Menadione_underestimated_proper.txt	GO:0009144	16.0	0.03288358372	111.0
1794	response to oxidative stress	CDC15_Menadione_underestimated_proper.txt	GO:0006979	17.0	0.033656808696	124.0
1795	cellular response to stimulus	CDC15_Menadione_underestimated_proper.txt	GO:0051716	70.0	0.0400825304652	1084.0
1796	purine ribonucleoside triphosphate metabolic process	YPK1_GlucoseDepletion_overestimated_proper.txt	GO:0009205	51.0	1.35248806956e-34	109.0
1797	ATP metabolic process	YPK1_GlucoseDepletion_overestimated_proper.txt	GO:0046034	50.0	1.4003977267e-34	104.0
1798	purine nucleoside triphosphate metabolic process	YPK1_GlucoseDepletion_overestimated_proper.txt	GO:0009144	51.0	4.28499789264e-34	111.0
1799	ribonucleoside triphosphate metabolic process	YPK1_GlucoseDepletion_overestimated_proper.txt	GO:0009199	51.0	1.31735023738e-33	113.0
1800	nucleoside triphosphate metabolic process	YPK1_GlucoseDepletion_overestimated_proper.txt	GO:0009141	51.0	8.94679934816e-32	121.0
1801	purine ribonucleoside metabolic process	YPK1_GlucoseDepletion_overestimated_proper.txt	GO:0046128	53.0	7.17962970806e-31	137.0
1802	purine nucleoside metabolic process	YPK1_GlucoseDepletion_overestimated_proper.txt	GO:0042278	53.0	1.11731592429e-30	138.0
1803	purine nucleoside monophosphate metabolic process	YPK1_GlucoseDepletion_overestimated_proper.txt	GO:0009126	51.0	4.14105259267e-30	129.0
1804	purine ribonucleoside monophosphate metabolic process	YPK1_GlucoseDepletion_overestimated_proper.txt	GO:0009167	51.0	4.14105259267e-30	129.0
1805	purine ribonucleotide metabolic process	YPK1_GlucoseDepletion_overestimated_proper.txt	GO:0009150	52.0	6.24957517676e-28	147.0
1806	ribonucleoside metabolic process	YPK1_GlucoseDepletion_overestimated_proper.txt	GO:0009119	53.0	1.10509733815e-27	155.0
1807	purine nucleotide metabolic process	YPK1_GlucoseDepletion_overestimated_proper.txt	GO:0006163	52.0	2.91514528403e-27	151.0
1808	ribonucleoside monophosphate metabolic process	YPK1_GlucoseDepletion_overestimated_proper.txt	GO:0009161	51.0	7.63630196476e-27	147.0
1809	nucleoside monophosphate metabolic process	YPK1_GlucoseDepletion_overestimated_proper.txt	GO:0009123	51.0	2.36194731661e-26	150.0
1810	nucleoside metabolic process	YPK1_GlucoseDepletion_overestimated_proper.txt	GO:0009116	53.0	7.88772763404e-26	167.0
1811	ribonucleotide metabolic process	YPK1_GlucoseDepletion_overestimated_proper.txt	GO:0009259	52.0	1.52966374311e-25	162.0
1812	purine-containing compound metabolic process	YPK1_GlucoseDepletion_overestimated_proper.txt	GO:0072521	53.0	1.54183468755e-25	169.0
1813	glycosyl compound metabolic process	YPK1_GlucoseDepletion_overestimated_proper.txt	GO:1901657	53.0	4.13150890617e-25	172.0
1814	ribose phosphate metabolic process	YPK1_GlucoseDepletion_overestimated_proper.txt	GO:0019693	53.0	9.39060726509e-24	182.0
1815	generation of precursor metabolites and energy	YPK1_GlucoseDepletion_overestimated_proper.txt	GO:0006091	53.0	3.28750471641e-21	203.0
1816	hydrogen ion transmembrane transport	YPK1_GlucoseDepletion_overestimated_proper.txt	GO:1902600	31.0	7.87026138879e-19	70.0
1817	nucleotide metabolic process	YPK1_GlucoseDepletion_overestimated_proper.txt	GO:0009117	54.0	7.39352001552e-18	245.0
1818	nucleoside phosphate metabolic process	YPK1_GlucoseDepletion_overestimated_proper.txt	GO:0006753	54.0	1.66771163141e-17	249.0
1819	nucleobase-containing small molecule metabolic process	YPK1_GlucoseDepletion_overestimated_proper.txt	GO:0055086	54.0	1.08166140723e-15	271.0
1820	small molecule metabolic process	YPK1_GlucoseDepletion_overestimated_proper.txt	GO:0044281	98.0	8.28908285942e-15	810.0
1821	carbohydrate derivative metabolic process	YPK1_GlucoseDepletion_overestimated_proper.txt	GO:1901135	62.0	5.49000390544e-14	379.0
1822	energy coupled proton transport, down electrochemical gradient	YPK1_GlucoseDepletion_overestimated_proper.txt	GO:0015985	16.0	3.4334737108e-13	22.0
1823	ATP synthesis coupled proton transport	YPK1_GlucoseDepletion_overestimated_proper.txt	GO:0015986	16.0	3.4334737108e-13	22.0
1824	proton transport	YPK1_GlucoseDepletion_overestimated_proper.txt	GO:0015992	32.0	4.60777261396e-13	110.0
1825	hydrogen transport	YPK1_GlucoseDepletion_overestimated_proper.txt	GO:0006818	32.0	6.18747293844e-13	111.0
1826	inorganic cation transmembrane transport	YPK1_GlucoseDepletion_overestimated_proper.txt	GO:0098662	32.0	2.56479860261e-12	116.0
1827	ATP biosynthetic process	YPK1_GlucoseDepletion_overestimated_proper.txt	GO:0006754	16.0	3.08418570285e-12	24.0
1828	cellular respiration	YPK1_GlucoseDepletion_overestimated_proper.txt	GO:0045333	31.0	5.17921576259e-12	111.0
1829	inorganic ion transmembrane transport	YPK1_GlucoseDepletion_overestimated_proper.txt	GO:0098660	34.0	7.80704191811e-12	136.0
1830	purine nucleoside triphosphate biosynthetic process	YPK1_GlucoseDepletion_overestimated_proper.txt	GO:0009145	17.0	8.63856461609e-12	29.0
1831	purine ribonucleoside triphosphate biosynthetic process	YPK1_GlucoseDepletion_overestimated_proper.txt	GO:0009206	17.0	8.63856461609e-12	29.0
1832	oxidative phosphorylation	YPK1_GlucoseDepletion_overestimated_proper.txt	GO:0006119	19.0	1.79165075865e-11	39.0
1833	organophosphate metabolic process	YPK1_GlucoseDepletion_overestimated_proper.txt	GO:0019637	63.0	2.45532545083e-11	440.0
1834	oxidation-reduction process	YPK1_GlucoseDepletion_overestimated_proper.txt	GO:0055114	64.0	3.80524829079e-11	456.0
1835	monovalent inorganic cation transport	YPK1_GlucoseDepletion_overestimated_proper.txt	GO:0015672	32.0	4.43771661992e-11	127.0
1836	energy derivation by oxidation of organic compounds	YPK1_GlucoseDepletion_overestimated_proper.txt	GO:0015980	36.0	7.21333015091e-11	163.0
1837	ATP synthesis coupled electron transport	YPK1_GlucoseDepletion_overestimated_proper.txt	GO:0042773	18.0	1.01318540275e-10	37.0
1838	mitochondrial ATP synthesis coupled electron transport	YPK1_GlucoseDepletion_overestimated_proper.txt	GO:0042775	18.0	1.01318540275e-10	37.0
1839	electron transport chain	YPK1_GlucoseDepletion_overestimated_proper.txt	GO:0022900	20.0	1.42243540831e-10	48.0
1840	ribonucleoside triphosphate biosynthetic process	YPK1_GlucoseDepletion_overestimated_proper.txt	GO:0009201	17.0	1.61288121629e-10	33.0
1841	nucleoside diphosphate metabolic process	YPK1_GlucoseDepletion_overestimated_proper.txt	GO:0009132	19.0	4.80270780941e-10	45.0
1842	respiratory electron transport chain	YPK1_GlucoseDepletion_overestimated_proper.txt	GO:0022904	19.0	4.80270780941e-10	45.0
1843	ADP metabolic process	YPK1_GlucoseDepletion_overestimated_proper.txt	GO:0046031	18.0	9.62973779675e-10	41.0
1844	nucleoside triphosphate biosynthetic process	YPK1_GlucoseDepletion_overestimated_proper.txt	GO:0009142	17.0	1.03451916136e-09	36.0
1845	purine nucleoside diphosphate metabolic process	YPK1_GlucoseDepletion_overestimated_proper.txt	GO:0009135	18.0	1.60885845588e-09	42.0
1846	purine ribonucleoside diphosphate metabolic process	YPK1_GlucoseDepletion_overestimated_proper.txt	GO:0009179	18.0	1.60885845588e-09	42.0
1847	ribonucleoside diphosphate metabolic process	YPK1_GlucoseDepletion_overestimated_proper.txt	GO:0009185	18.0	1.60885845588e-09	42.0
1848	single-organism metabolic process	YPK1_GlucoseDepletion_overestimated_proper.txt	GO:0044710	129.0	2.49521830605e-09	1470.0
1849	purine nucleoside biosynthetic process	YPK1_GlucoseDepletion_overestimated_proper.txt	GO:0042451	19.0	3.08476909235e-09	49.0
1850	purine ribonucleoside biosynthetic process	YPK1_GlucoseDepletion_overestimated_proper.txt	GO:0046129	19.0	3.08476909235e-09	49.0
1851	cation transmembrane transport	YPK1_GlucoseDepletion_overestimated_proper.txt	GO:0098655	33.0	4.40370610473e-09	157.0
1852	nucleoside diphosphate phosphorylation	YPK1_GlucoseDepletion_overestimated_proper.txt	GO:0006165	16.0	1.02190674132e-08	35.0
1853	pyruvate metabolic process	YPK1_GlucoseDepletion_overestimated_proper.txt	GO:0006090	19.0	1.08771124535e-08	52.0
1854	nucleotide phosphorylation	YPK1_GlucoseDepletion_overestimated_proper.txt	GO:0046939	17.0	2.32103959688e-08	42.0
1855	glycolytic process	YPK1_GlucoseDepletion_overestimated_proper.txt	GO:0006096	15.0	5.70552605856e-08	33.0
1856	ATP generation from ADP	YPK1_GlucoseDepletion_overestimated_proper.txt	GO:0006757	15.0	5.70552605856e-08	33.0
1857	cristae formation	YPK1_GlucoseDepletion_overestimated_proper.txt	GO:0042407	9.0	9.24608869378e-08	10.0
1858	mitochondrial electron transport, ubiquinol to cytochrome c	YPK1_GlucoseDepletion_overestimated_proper.txt	GO:0006122	10.0	1.18071546628e-07	13.0
1859	aerobic respiration	YPK1_GlucoseDepletion_overestimated_proper.txt	GO:0009060	22.0	1.28286789189e-07	80.0
1860	purine nucleoside monophosphate biosynthetic process	YPK1_GlucoseDepletion_overestimated_proper.txt	GO:0009127	17.0	1.982944653e-07	47.0
1861	purine ribonucleoside monophosphate biosynthetic process	YPK1_GlucoseDepletion_overestimated_proper.txt	GO:0009168	17.0	1.982944653e-07	47.0
1862	ribonucleoside biosynthetic process	YPK1_GlucoseDepletion_overestimated_proper.txt	GO:0042455	19.0	9.63748386491e-07	65.0
1863	nucleoside biosynthetic process	YPK1_GlucoseDepletion_overestimated_proper.txt	GO:0009163	19.0	1.29227111925e-06	66.0
1864	ion transmembrane transport	YPK1_GlucoseDepletion_overestimated_proper.txt	GO:0034220	37.0	1.64447264518e-06	236.0
1865	cation transport	YPK1_GlucoseDepletion_overestimated_proper.txt	GO:0006812	37.0	2.69331267897e-06	240.0
1866	ATP hydrolysis coupled cation transmembrane transport	YPK1_GlucoseDepletion_overestimated_proper.txt	GO:0099132	14.0	3.61228452903e-06	36.0
1867	glycosyl compound biosynthetic process	YPK1_GlucoseDepletion_overestimated_proper.txt	GO:1901659	19.0	3.94165202611e-06	70.0
1868	purine ribonucleotide biosynthetic process	YPK1_GlucoseDepletion_overestimated_proper.txt	GO:0009152	18.0	4.46323203212e-06	63.0
1869	carboxylic acid metabolic process	YPK1_GlucoseDepletion_overestimated_proper.txt	GO:0019752	52.0	7.83113216992e-06	433.0
1870	sulfate assimilation	YPK1_GlucoseDepletion_overestimated_proper.txt	GO:0000103	8.0	8.09139373315e-06	10.0
1871	purine-containing compound biosynthetic process	YPK1_GlucoseDepletion_overestimated_proper.txt	GO:0072522	19.0	8.60318879578e-06	73.0
1872	inner mitochondrial membrane organization	YPK1_GlucoseDepletion_overestimated_proper.txt	GO:0007007	12.0	9.78523537903e-06	27.0
1873	purine nucleotide biosynthetic process	YPK1_GlucoseDepletion_overestimated_proper.txt	GO:0006164	18.0	1.02766029361e-05	66.0
1874	oxoacid metabolic process	YPK1_GlucoseDepletion_overestimated_proper.txt	GO:0043436	53.0	1.07451923717e-05	450.0
1875	organic acid metabolic process	YPK1_GlucoseDepletion_overestimated_proper.txt	GO:0006082	53.0	1.16463795613e-05	451.0
1876	phosphorus metabolic process	YPK1_GlucoseDepletion_overestimated_proper.txt	GO:0006793	79.0	1.42300444505e-05	825.0
1877	ATP hydrolysis coupled transmembrane transport	YPK1_GlucoseDepletion_overestimated_proper.txt	GO:0090662	14.0	1.83436428517e-05	40.0
1878	ATP hydrolysis coupled ion transmembrane transport	YPK1_GlucoseDepletion_overestimated_proper.txt	GO:0099131	14.0	1.83436428517e-05	40.0
1879	phosphate-containing compound metabolic process	YPK1_GlucoseDepletion_overestimated_proper.txt	GO:0006796	76.0	3.47556053055e-05	795.0
1880	pyridine-containing compound metabolic process	YPK1_GlucoseDepletion_overestimated_proper.txt	GO:0072524	21.0	5.31825918971e-05	98.0
1881	ribonucleoside monophosphate biosynthetic process	YPK1_GlucoseDepletion_overestimated_proper.txt	GO:0009156	17.0	5.88232490803e-05	65.0
1882	hydrogen sulfide metabolic process	YPK1_GlucoseDepletion_overestimated_proper.txt	GO:0070813	6.0	8.06050450894e-05	6.0
1883	hydrogen sulfide biosynthetic process	YPK1_GlucoseDepletion_overestimated_proper.txt	GO:0070814	6.0	8.06050450894e-05	6.0
1884	nucleoside monophosphate biosynthetic process	YPK1_GlucoseDepletion_overestimated_proper.txt	GO:0009124	17.0	0.000123252385753	68.0
1885	nicotinamide nucleotide metabolic process	YPK1_GlucoseDepletion_overestimated_proper.txt	GO:0046496	19.0	0.000132035383404	85.0
1886	pyridine nucleotide metabolic process	YPK1_GlucoseDepletion_overestimated_proper.txt	GO:0019362	19.0	0.000161827336947	86.0
1887	ribonucleotide biosynthetic process	YPK1_GlucoseDepletion_overestimated_proper.txt	GO:0009260	18.0	0.00018317315076	78.0
1888	organonitrogen compound metabolic process	YPK1_GlucoseDepletion_overestimated_proper.txt	GO:1901564	111.0	0.000245636490369	1404.0
1889	phosphorylation	YPK1_GlucoseDepletion_overestimated_proper.txt	GO:0016310	45.0	0.000473015948948	392.0
1890	single-organism biosynthetic process	YPK1_GlucoseDepletion_overestimated_proper.txt	GO:0044711	67.0	0.000493567513923	706.0
1891	ribose phosphate biosynthetic process	YPK1_GlucoseDepletion_overestimated_proper.txt	GO:0046390	18.0	0.000621392666394	84.0
1892	mitochondrion organization	YPK1_GlucoseDepletion_overestimated_proper.txt	GO:0007005	36.0	0.000643894392834	280.0
1893	ion transport	YPK1_GlucoseDepletion_overestimated_proper.txt	GO:0006811	46.0	0.000668377137243	410.0
1894	mitochondrial membrane organization	YPK1_GlucoseDepletion_overestimated_proper.txt	GO:0007006	14.0	0.00134651180332	54.0
1895	oxidoreduction coenzyme metabolic process	YPK1_GlucoseDepletion_overestimated_proper.txt	GO:0006733	19.0	0.00241861920227	101.0
1896	glucose metabolic process	YPK1_GlucoseDepletion_overestimated_proper.txt	GO:0006006	15.0	0.00873259045868	71.0
1897	protein complex oligomerization	YPK1_GlucoseDepletion_overestimated_proper.txt	GO:0035786	5.0	0.00932472500788	6.0
1898	transmembrane transport	YPK1_GlucoseDepletion_overestimated_proper.txt	GO:0055085	47.0	0.0152342199985	471.0
1899	sulfur amino acid biosynthetic process	YPK1_GlucoseDepletion_overestimated_proper.txt	GO:0000097	11.0	0.0184960412886	41.0
1900	gluconeogenesis	YPK1_GlucoseDepletion_overestimated_proper.txt	GO:0006094	10.0	0.0278306456223	35.0
1901	hexose biosynthetic process	YPK1_GlucoseDepletion_overestimated_proper.txt	GO:0019319	10.0	0.0278306456223	35.0
1902	serine family amino acid biosynthetic process	YPK1_GlucoseDepletion_overestimated_proper.txt	GO:0009070	9.0	0.0282271000494	28.0
1903	sulfate reduction	YPK1_GlucoseDepletion_overestimated_proper.txt	GO:0019419	4.0	0.0325500609827	4.0
1904	single-organism carbohydrate catabolic process	YPK1_GlucoseDepletion_overestimated_proper.txt	GO:0044724	17.0	0.041756158801	100.0
1905	monosaccharide biosynthetic process	YPK1_GlucoseDepletion_overestimated_proper.txt	GO:0046364	10.0	0.0482137073712	37.0
1906	organonitrogen compound catabolic process	WT4_Tunicamycin_overestimated_proper.txt	GO:1901565	9.0	0.00396971784037	109.0
1907	carboxylic acid metabolic process	WT4_Tunicamycin_overestimated_proper.txt	GO:0019752	16.0	0.00930177777099	433.0
1908	small molecule biosynthetic process	WT4_Tunicamycin_overestimated_proper.txt	GO:0044283	14.0	0.0118682078979	336.0
1909	organic acid biosynthetic process	WT4_Tunicamycin_overestimated_proper.txt	GO:0016053	11.0	0.012362288085	200.0
1910	carboxylic acid biosynthetic process	WT4_Tunicamycin_overestimated_proper.txt	GO:0046394	11.0	0.012362288085	200.0
1911	oxoacid metabolic process	WT4_Tunicamycin_overestimated_proper.txt	GO:0043436	16.0	0.0154738830896	450.0
1912	organic acid metabolic process	WT4_Tunicamycin_overestimated_proper.txt	GO:0006082	16.0	0.0159296681079	451.0
1913	cellular amino acid metabolic process	WT4_Tunicamycin_overestimated_proper.txt	GO:0006520	12.0	0.0207135245447	255.0
1914	cytoplasmic translation	IRE1_Tunicamycin_underestimated_proper.txt	GO:0002181	18.0	9.02914312808e-05	184.0
1915	transport	YPK3_Azetidine_underestimated_proper.txt	GO:0006810	41.0	1.55059204137e-06	1368.0
1916	establishment of localization	YPK3_Azetidine_underestimated_proper.txt	GO:0051234	41.0	5.65488352965e-06	1423.0
1917	localization	YPK3_Azetidine_underestimated_proper.txt	GO:0051179	43.0	8.19146762472e-06	1575.0
1918	vesicle-mediated transport	YPK3_Azetidine_underestimated_proper.txt	GO:0016192	21.0	2.40321390027e-05	402.0
1919	protein transport	YPK3_Azetidine_underestimated_proper.txt	GO:0015031	24.0	0.000278018764381	600.0
1920	establishment of protein localization	YPK3_Azetidine_underestimated_proper.txt	GO:0045184	24.0	0.000540533233594	621.0
1921	organic substance transport	YPK3_Azetidine_underestimated_proper.txt	GO:0071702	29.0	0.00173522096119	932.0
1922	macromolecule localization	YPK3_Azetidine_underestimated_proper.txt	GO:0033036	28.0	0.00435240087557	914.0
1923	protein localization	YPK3_Azetidine_underestimated_proper.txt	GO:0008104	24.0	0.0213420169725	757.0
1924	endosomal transport	YPK3_Azetidine_underestimated_proper.txt	GO:0016197	9.0	0.0380734712262	113.0
1925	protein refolding	SNF1_Menadione_underestimated_proper.txt	GO:0042026	8.0	4.37454024663e-06	17.0
1926	protein folding	SNF1_Menadione_underestimated_proper.txt	GO:0006457	16.0	6.34320148791e-06	110.0
1927	response to abiotic stimulus	SNF1_Menadione_underestimated_proper.txt	GO:0009628	18.0	0.000378935063869	185.0
1928	response to stress	SNF1_Menadione_underestimated_proper.txt	GO:0006950	41.0	0.000438922623049	818.0
1929	response to temperature stimulus	SNF1_Menadione_underestimated_proper.txt	GO:0009266	12.0	0.000521362614296	79.0
1930	response to stimulus	SNF1_Menadione_underestimated_proper.txt	GO:0050896	53.0	0.000587329735564	1244.0
1931	response to oxidative stress	SNF1_Menadione_underestimated_proper.txt	GO:0006979	14.0	0.00194988419997	124.0
1932	cellular response to oxidative stress	SNF1_Menadione_underestimated_proper.txt	GO:0034599	13.0	0.00516125452687	115.0
1933	cellular response to stress	SNF1_Menadione_underestimated_proper.txt	GO:0033554	35.0	0.012034045102	721.0
1934	response to heat	SNF1_Menadione_underestimated_proper.txt	GO:0009408	10.0	0.0193458022672	74.0
1935	water transport	SSN3_Heatshock_overestimated_proper.txt	GO:0006833	3.0	0.0149964549061	4.0
1936	fluid transport	SSN3_Heatshock_overestimated_proper.txt	GO:0042044	3.0	0.0149964549061	4.0
1937	single-organism cellular process	YPK1_YPD_overestimated_proper.txt	GO:0044763	50.0	0.0227951163583	2937.0
1938	conjugation with cellular fusion	HOG1_Salt_underestimated_proper.txt	GO:0000747	24.0	1.40705339811e-09	125.0
1939	conjugation	HOG1_Salt_underestimated_proper.txt	GO:0000746	24.0	1.69250604748e-09	126.0
1940	multi-organism cellular process	HOG1_Salt_underestimated_proper.txt	GO:0044764	24.0	6.96643967992e-09	134.0
1941	cell cycle	HOG1_Salt_underestimated_proper.txt	GO:0007049	59.0	2.63190217186e-07	815.0
1942	reproductive process	HOG1_Salt_underestimated_proper.txt	GO:0022414	42.0	4.85870391479e-06	501.0
1943	reproduction	HOG1_Salt_underestimated_proper.txt	GO:0000003	42.0	1.28438077694e-05	517.0
1944	cell cycle process	HOG1_Salt_underestimated_proper.txt	GO:0022402	48.0	1.62359549725e-05	649.0
1945	DNA repair	HOG1_Salt_underestimated_proper.txt	GO:0006281	30.0	5.08870870499e-05	305.0
1946	mitotic cell cycle	HOG1_Salt_underestimated_proper.txt	GO:0000278	35.0	7.61498759344e-05	405.0
1947	chromosome organization	HOG1_Salt_underestimated_proper.txt	GO:0051276	45.0	0.000101908581443	619.0
1948	response to pheromone	HOG1_Salt_underestimated_proper.txt	GO:0019236	17.0	0.000142749779002	109.0
1949	sexual reproduction	HOG1_Salt_underestimated_proper.txt	GO:0019953	26.0	0.00015119214921	248.0
1950	multi-organism reproductive process	HOG1_Salt_underestimated_proper.txt	GO:0044703	26.0	0.00015119214921	248.0
1951	cellular response to pheromone	HOG1_Salt_underestimated_proper.txt	GO:0071444	16.0	0.000222477422812	99.0
1952	cellular response to stimulus	HOG1_Salt_underestimated_proper.txt	GO:0051716	63.0	0.000426309913925	1084.0
1953	cellular response to DNA damage stimulus	HOG1_Salt_underestimated_proper.txt	GO:0006974	31.0	0.000528859175279	357.0
1954	multi-organism process	HOG1_Salt_underestimated_proper.txt	GO:0051704	26.0	0.00074040733058	268.0
1955	response to pheromone involved in conjugation with cellular fusion	HOG1_Salt_underestimated_proper.txt	GO:0000749	14.0	0.000933792843836	83.0
1956	DNA-dependent DNA replication	HOG1_Salt_underestimated_proper.txt	GO:0006261	18.0	0.0010454297018	139.0
1957	mitotic cell cycle process	HOG1_Salt_underestimated_proper.txt	GO:1903047	31.0	0.00112312398	369.0
1958	DNA replication	HOG1_Salt_underestimated_proper.txt	GO:0006260	19.0	0.00139546236001	157.0
1959	cellular component organization	HOG1_Salt_underestimated_proper.txt	GO:0016043	97.0	0.00163398021095	2086.0
1960	response to stimulus	HOG1_Salt_underestimated_proper.txt	GO:0050896	67.0	0.00269325761399	1244.0
1961	recombinational repair	HOG1_Salt_underestimated_proper.txt	GO:0000725	13.0	0.00728428587401	84.0
1962	karyogamy involved in conjugation with cellular fusion	HOG1_Salt_underestimated_proper.txt	GO:0000742	6.0	0.0166297783067	15.0
1963	double-strand break repair via homologous recombination	HOG1_Salt_underestimated_proper.txt	GO:0000724	12.0	0.0174443251361	77.0
1964	microtubule-based movement	HOG1_Salt_underestimated_proper.txt	GO:0007018	7.0	0.0201788900391	23.0
1965	microtubule-based process	HOG1_Salt_underestimated_proper.txt	GO:0007017	15.0	0.0221918865512	122.0
1966	pheromone-dependent signal transduction involved in conjugation with cellular fusion	HOG1_Salt_underestimated_proper.txt	GO:0000750	8.0	0.0266236535641	33.0
1967	signal transduction involved in conjugation with cellular fusion	HOG1_Salt_underestimated_proper.txt	GO:0032005	8.0	0.0266236535641	33.0
1968	regulation of cellular process	HOG1_Salt_underestimated_proper.txt	GO:0050794	78.0	0.028140657003	1634.0
1969	chromatin organization	HOG1_Salt_underestimated_proper.txt	GO:0006325	27.0	0.0282117701431	344.0
1970	tRNA splicing, via endonucleolytic cleavage and ligation	HOG1_Salt_underestimated_proper.txt	GO:0006388	5.0	0.0309343550362	10.0
1971	sister chromatid segregation	HOG1_Salt_underestimated_proper.txt	GO:0000819	17.0	0.0318084110418	158.0
1972	movement of cell or subcellular component	HOG1_Salt_underestimated_proper.txt	GO:0006928	7.0	0.0499710157637	26.0
1973	organonitrogen compound catabolic process	SNF1_Heatshock_overestimated_proper.txt	GO:1901565	16.0	9.24613792171e-05	109.0
1974	allantoin metabolic process	SNF1_Heatshock_overestimated_proper.txt	GO:0000255	5.0	0.00125530897285	7.0
1975	allantoin catabolic process	SNF1_Heatshock_overestimated_proper.txt	GO:0000256	5.0	0.00125530897285	7.0
1976	cellular amide catabolic process	SNF1_Heatshock_overestimated_proper.txt	GO:0043605	5.0	0.00721286585384	9.0
1977	organic substance catabolic process	SNF1_Heatshock_overestimated_proper.txt	GO:1901575	40.0	0.0184152824932	735.0
1978	catabolic process	SNF1_Heatshock_overestimated_proper.txt	GO:0009056	40.0	0.0226066681955	741.0
1979	RNA metabolic process	CDC15_Tunicamycin_underestimated_proper.txt	GO:0016070	173.0	6.47449595398e-08	1545.0
1980	cellular aromatic compound metabolic process	CDC15_Tunicamycin_underestimated_proper.txt	GO:0006725	218.0	1.30188123215e-07	2126.0
1981	heterocycle metabolic process	CDC15_Tunicamycin_underestimated_proper.txt	GO:0046483	219.0	1.43793950948e-07	2141.0
1982	nucleobase-containing compound metabolic process	CDC15_Tunicamycin_underestimated_proper.txt	GO:0006139	209.0	7.77126060241e-07	2043.0
1983	organic cyclic compound metabolic process	CDC15_Tunicamycin_underestimated_proper.txt	GO:1901360	221.0	8.93091876622e-07	2203.0
1984	nucleic acid metabolic process	CDC15_Tunicamycin_underestimated_proper.txt	GO:0090304	189.0	1.3892376057e-06	1798.0
1985	cellular component organization or biogenesis	CDC15_Tunicamycin_underestimated_proper.txt	GO:0071840	239.0	2.55532529797e-06	2466.0
1986	mRNA metabolic process	CDC15_Tunicamycin_underestimated_proper.txt	GO:0016071	55.0	4.61744662794e-06	323.0
1987	RNA processing	CDC15_Tunicamycin_underestimated_proper.txt	GO:0006396	88.0	8.23496066849e-06	652.0
1988	cellular component organization	CDC15_Tunicamycin_underestimated_proper.txt	GO:0016043	208.0	1.2315181271e-05	2086.0
1989	DNA-templated transcription, initiation	CDC15_Tunicamycin_underestimated_proper.txt	GO:0006352	24.0	2.26656337634e-05	86.0
1990	tRNA processing	CDC15_Tunicamycin_underestimated_proper.txt	GO:0008033	29.0	0.000103350890481	128.0
1991	transcription initiation from RNA polymerase II promoter	CDC15_Tunicamycin_underestimated_proper.txt	GO:0006367	20.0	0.000171644407388	68.0
1992	tRNA metabolic process	CDC15_Tunicamycin_underestimated_proper.txt	GO:0006399	38.0	0.000173601767748	203.0
1993	protein localization to membrane	CDC15_Tunicamycin_underestimated_proper.txt	GO:0072657	27.0	0.000454111516849	121.0
1994	DNA-templated transcription, elongation	CDC15_Tunicamycin_underestimated_proper.txt	GO:0006354	24.0	0.000455383180954	99.0
1995	macromolecular complex subunit organization	CDC15_Tunicamycin_underestimated_proper.txt	GO:0043933	88.0	0.000783181182228	715.0
1996	snoRNA processing	CDC15_Tunicamycin_underestimated_proper.txt	GO:0043144	15.0	0.00150597636759	45.0
1997	protein-DNA complex subunit organization	CDC15_Tunicamycin_underestimated_proper.txt	GO:0071824	34.0	0.00150849752901	185.0
1998	positive regulation of DNA-templated transcription, elongation	CDC15_Tunicamycin_underestimated_proper.txt	GO:0032786	16.0	0.00210149611449	52.0
[truncated: 704 more rows]
