# Supplementary material for: Multi-kinase control of environmental stress responsive transcription
Source: PLoS One. 2020 Mar 11;15(3):e0230246. doi: 10.1371/journal.pone.0230246 (PMC7065805; doi:10.1371/journal.pone.0230246)
Supplement: S5 Table — Transcription factors and associated significance values with motifs enriched among the genes with residuals that are more than 2.5 standard deviations from the mean in each condition and kinase inhibition set. (CSV) [file pone.0230246.s005.csv]

TF	num_genes	left_pval	right_pval	two_tailed_pval	corrected_left_pval	corrected_right_pval	corrected_two_tailed_pval	Kinase	Condition	Direction
SFP1	783	1	3.777e-61	7.554e-61	1	6.648e-59	6.648e-59	YPK1	Heatshock	underestimated
STB3	410	1	4.023e-57	8.046e-57	1	7.08e-55	7.08e-55	KIN1	Menadione	underestimated
STB3	783	1	1.422e-56	2.844e-56	1	2.503e-54	2.503e-54	YPK1	Heatshock	underestimated
SUM1	783	1	1.92e-56	3.841e-56	1	3.38e-54	3.38e-54	YPK1	Heatshock	underestimated
SFP1	410	1	3.111e-55	6.222e-55	1	5.475e-53	5.475e-53	KIN1	Menadione	underestimated
SUM1	410	1	8.379e-48	1.676e-47	1	1.475e-45	1.475e-45	KIN1	Menadione	underestimated
TOD6	410	1	3.034e-46	6.067e-46	1	5.339e-44	5.339e-44	KIN1	Menadione	underestimated
DOT6	410	1	3.445e-42	6.89e-42	1	6.063e-40	6.063e-40	KIN1	Menadione	underestimated
DOT6	783	1	4.5e-39	9.001e-39	1	7.921e-37	7.921e-37	YPK1	Heatshock	underestimated
TOD6	783	1	1.857e-37	3.713e-37	1	3.267e-35	3.267e-35	YPK1	Heatshock	underestimated
SFP1	338	1	7.435e-32	1.487e-31	1	1.309e-29	1.309e-29	CDC5	Tunicamycin	overestimated
MSN2	275	1	1.13e-31	2.26e-31	1	1.989e-29	1.989e-29	CDC15	Menadione	underestimated
MSN4	275	1	1.667e-31	3.333e-31	1	2.933e-29	2.933e-29	CDC15	Menadione	underestimated
RGM1	170	1	2.114e-31	4.228e-31	1	3.721e-29	3.721e-29	SCH9	YPD	overestimated
TOD6	265	1	2.447e-30	4.895e-30	1	4.307e-28	4.307e-28	ATG1	Menadione	underestimated
MSN4	170	1	3.078e-30	6.157e-30	1	5.418e-28	5.418e-28	SCH9	YPD	overestimated
STB3	338	1	8.159e-30	1.632e-29	1	1.436e-27	1.436e-27	CDC5	Tunicamycin	overestimated
RGM1	275	1	9.143e-30	1.829e-29	1	1.609e-27	1.609e-27	CDC15	Menadione	underestimated
MSN2	170	1	1.085e-29	2.17e-29	1	1.91e-27	1.91e-27	SCH9	YPD	overestimated
GIS1	275	1	2.189e-29	4.377e-29	1	3.852e-27	3.852e-27	CDC15	Menadione	underestimated
GIS1	170	1	2.298e-29	4.597e-29	1	4.045e-27	4.045e-27	SCH9	YPD	overestimated
SFP1	265	1	7.016e-29	1.403e-28	1	1.235e-26	1.235e-26	ATG1	Menadione	underestimated
DOT6	265	1	7.894e-28	1.579e-27	1	1.389e-25	1.389e-25	ATG1	Menadione	underestimated
RPH1	170	1	4.889e-27	9.777e-27	1	8.604e-25	8.604e-25	SCH9	YPD	overestimated
TOD6	681	1	9.727e-27	1.945e-26	1	1.712e-24	1.712e-24	RIM11	Heatshock	underestimated
SUM1	338	1	3.947e-26	7.895e-26	1	6.947e-24	6.947e-24	CDC5	Tunicamycin	overestimated
STB3	265	1	3.643e-25	7.285e-25	1	6.411e-23	6.411e-23	ATG1	Menadione	underestimated
GIS1	412	1	1.026e-24	2.052e-24	1	1.806e-22	1.806e-22	SSN3	Menadione	underestimated
REI1	170	1	1.152e-24	2.304e-24	1	2.028e-22	2.028e-22	SCH9	YPD	overestimated
MSN2	1494	1	1.691e-24	3.382e-24	1	2.977e-22	2.977e-22	SCH9	Menadione	underestimated
MSN2	412	1	2.023e-23	4.045e-23	1	3.56e-21	3.56e-21	SSN3	Menadione	underestimated
MSN4	1494	1	4.223e-23	8.446e-23	1	7.433e-21	7.433e-21	SCH9	Menadione	underestimated
DOT6	681	1	4.263e-23	8.525e-23	1	7.502e-21	7.502e-21	RIM11	Heatshock	underestimated
STB3	401	1	4.401e-23	8.802e-23	1	7.746e-21	7.746e-21	RIM15	SDC	overestimated
MSN4	412	1	4.831e-23	9.662e-23	1	8.502e-21	8.502e-21	SSN3	Menadione	underestimated
RGM1	412	1	5.765e-23	1.153e-22	1	1.015e-20	1.015e-20	SSN3	Menadione	underestimated
RPH1	275	1	6.059e-23	1.212e-22	1	1.066e-20	1.066e-20	CDC15	Menadione	underestimated
SUM1	265	1	1.466e-22	2.933e-22	1	2.581e-20	2.581e-20	ATG1	Menadione	underestimated
RGM1	1494	1	2.169e-22	4.338e-22	1	3.818e-20	3.818e-20	SCH9	Menadione	underestimated
YER130C	275	1	4.342e-22	8.683e-22	1	7.641e-20	7.641e-20	CDC15	Menadione	underestimated
STB3	312	1	7.151e-22	1.43e-21	1	1.259e-19	1.259e-19	YPK3	Heatshock	underestimated
STB3	385	1	8.365e-21	1.673e-20	1	1.472e-18	1.472e-18	SSN3	Menadione	overestimated
REI1	275	1	2.008e-20	4.016e-20	1	3.534e-18	3.534e-18	CDC15	Menadione	underestimated
YER130C	412	1	2.214e-20	4.4290000000000003e-20	1	3.897e-18	3.897e-18	SSN3	Menadione	underestimated
YER130C	170	1	2.309e-20	4.618e-20	1	4.064e-18	4.064e-18	SCH9	YPD	overestimated
STB3	1100	1	5.841e-20	1.168e-19	1	1.028e-17	1.028e-17	SCH9	Menadione	overestimated
RPN4	1494	1	1.564e-19	3.128e-19	1	2.753e-17	2.753e-17	SCH9	Menadione	underestimated
SFP1	401	1	2.461e-19	4.922e-19	1	4.332e-17	4.332e-17	RIM15	SDC	overestimated
STB3	681	1	2.585e-19	5.17e-19	1	4.55e-17	4.55e-17	RIM11	Heatshock	underestimated
GIS1	1494	1	2.415e-18	4.83e-18	1	4.251e-16	4.251e-16	SCH9	Menadione	underestimated
RPH1	412	1	5.598e-18	1.12e-17	1	9.852e-16	9.852e-16	SSN3	Menadione	underestimated
SUM1	1100	1	7.363e-18	1.473e-17	1	1.296e-15	1.296e-15	SCH9	Menadione	overestimated
TOD6	338	1	4.13e-17	8.26e-17	1	7.269e-15	7.269e-15	CDC5	Tunicamycin	overestimated
SFP1	681	1	4.418e-17	8.836e-17	1	7.775e-15	7.775e-15	RIM11	Heatshock	underestimated
MSN2	1472	1	6.451e-17	1.29e-16	1	1.135e-14	1.135e-14	YPK1	Menadione	underestimated
YER130C	1494	1	1.166e-16	2.332e-16	1	2.052e-14	2.052e-14	SCH9	Menadione	underestimated
SUM1	401	1	2.18e-16	4.36e-16	1	3.837e-14	3.837e-14	RIM15	SDC	overestimated
MSN4	1472	1	2.244e-16	4.487e-16	1	3.949e-14	3.949e-14	YPK1	Menadione	underestimated
DOT6	338	1	3.254e-16	6.508e-16	1	5.727e-14	5.727e-14	CDC5	Tunicamycin	overestimated
SFP1	385	1	6e-16	1.2e-15	1	1.056e-13	1.056e-13	SSN3	Menadione	overestimated
SUM1	385	1	7.133e-16	1.427e-15	1	1.255e-13	1.255e-13	SSN3	Menadione	overestimated
USV1	170	1	1.022e-15	2.043e-15	1	1.798e-13	1.798e-13	SCH9	YPD	overestimated
MSN2	164	1	1.416e-15	2.831e-15	1	2.492e-13	2.492e-13	YPK1	Tunicamycin	overestimated
USV1	412	1	1.517e-15	3.034e-15	1	2.67e-13	2.67e-13	SSN3	Menadione	underestimated
RGM1	1472	1	1.521e-15	3.041e-15	1	2.677e-13	2.677e-13	YPK1	Menadione	underestimated
RPH1	1494	1	2.058e-15	4.116e-15	1	3.622e-13	3.622e-13	SCH9	Menadione	underestimated
SFP1	312	1	2.746e-15	5.492e-15	1	4.833e-13	4.833e-13	YPK3	Heatshock	underestimated
REI1	412	1	3.074e-15	6.148e-15	1	5.411e-13	5.411e-13	SSN3	Menadione	underestimated
MET31	249	1	4.147e-15	8.295e-15	1	7.2990000000000005e-13	7.2990000000000005e-13	TOR2	SDC	underestimated
YER130C	573	1	4.194e-15	8.388e-15	1	7.382e-13	7.382e-13	YPK1	Heatshock	overestimated
GIS1	573	1	4.423e-15	8.846e-15	1	7.785e-13	7.785e-13	YPK1	Heatshock	overestimated
TOD6	312	1	6.648e-15	1.33e-14	1	1.17e-12	1.17e-12	YPK3	Heatshock	underestimated
DOT6	312	1	9.4e-15	1.88e-14	1	1.654e-12	1.654e-12	YPK3	Heatshock	underestimated
MSN4	164	1	1.217e-14	2.433e-14	1	2.141e-12	2.141e-12	YPK1	Tunicamycin	overestimated
RAP1	401	1	1.39e-14	2.78e-14	1	2.446e-12	2.446e-12	RIM15	SDC	overestimated
AZF1	783	1	1.548e-14	3.095e-14	1	2.724e-12	2.724e-12	YPK1	Heatshock	underestimated
MSN4	573	1	2.957e-14	5.913e-14	1	5.203e-12	5.203e-12	YPK1	Heatshock	overestimated
RGM1	573	1	5.462e-14	1.092e-13	1	9.613e-12	9.613e-12	YPK1	Heatshock	overestimated
DOT6	401	1	6.14e-14	1.228e-13	1	1.081e-11	1.081e-11	RIM15	SDC	overestimated
USV1	275	1	7.021e-14	1.404e-13	1	1.236e-11	1.236e-11	CDC15	Menadione	underestimated
TOD6	401	1	7.589e-14	1.518e-13	1	1.336e-11	1.336e-11	RIM15	SDC	overestimated
CRZ1	359	1	8.477e-14	1.695e-13	1	1.492e-11	1.492e-11	YPK3	Heatshock	overestimated
GIS1	1472	1	9.858e-14	1.972e-13	1	1.735e-11	1.735e-11	YPK1	Menadione	underestimated
MSN2	573	1	1.022e-13	2.044e-13	1	1.799e-11	1.799e-11	YPK1	Heatshock	overestimated
SFP1	1100	1	1.315e-13	2.63e-13	1	2.315e-11	2.315e-11	SCH9	Menadione	overestimated
REI1	1494	1	5.355e-13	1.071e-12	1	9.424e-11	9.424e-11	SCH9	Menadione	underestimated
RGM1	164	1	8.753e-13	1.751e-12	1	1.541e-10	1.541e-10	YPK1	Tunicamycin	overestimated
MET31	1494	1	8.934e-13	1.787e-12	1	1.572e-10	1.572e-10	SCH9	Menadione	underestimated
RPN4	249	1	1.111e-12	2.222e-12	1	1.955e-10	1.955e-10	TOR2	SDC	underestimated
YER130C	164	1	3.929e-12	7.859e-12	1	6.916e-10	6.916e-10	YPK1	Tunicamycin	overestimated
GIS1	252	1	6.135e-12	1.227e-11	1	1.08e-9	1.08e-9	TPK123	Salt	overestimated
ZMS1	275	1	6.747e-12	1.349e-11	1	1.188e-9	1.188e-9	CDC15	Menadione	underestimated
MBP1	76	1	7.434e-12	1.487e-11	1	1.308e-9	1.308e-9	SCH9	YPD	underestimated
MET32	249	1	7.763e-12	1.553e-11	1	1.366e-9	1.366e-9	TOR2	SDC	underestimated
RGM1	59	1	7.787e-12	1.557e-11	1	1.371e-9	1.371e-9	YPK3	Salt	underestimated
RPH1	573	1	7.834e-12	1.567e-11	1	1.379e-9	1.379e-9	YPK1	Heatshock	overestimated
MSN4	59	1	9.231e-12	1.846e-11	1	1.625e-9	1.625e-9	YPK3	Salt	underestimated
MSN2	59	1	1.394e-11	2.788e-11	1	2.454e-9	2.454e-9	YPK3	Salt	underestimated
NCU00019	1100	1	1.568e-11	3.136e-11	1	2.759e-9	2.759e-9	SCH9	Menadione	overestimated
SUM1	312	1	2.279e-11	4.557e-11	1	4.01e-9	4.01e-9	YPK3	Heatshock	underestimated
RPH1	1472	1	2.683e-11	5.365e-11	1	4.721e-9	4.721e-9	YPK1	Menadione	underestimated
GIS1	59	1	2.713e-11	5.427e-11	1	4.776e-9	4.776e-9	YPK3	Salt	underestimated
STB3	1075	1	3.112e-11	6.224e-11	1	5.477e-9	5.477e-9	YPK1	Menadione	overestimated
ZMS1	170	1	3.378e-11	6.756e-11	1	5.945e-9	5.945e-9	SCH9	YPD	overestimated
FKH1	1100	1	3.496e-11	6.993e-11	1	6.154e-9	6.154e-9	SCH9	Menadione	overestimated
TDA9	1494	1	5.992e-11	1.198e-10	1	1.055e-8	1.055e-8	SCH9	Menadione	underestimated
ZMS1	412	1	7.078e-11	1.416e-10	1	1.246e-8	1.246e-8	SSN3	Menadione	underestimated
MSN2	359	1	7.16e-11	1.432e-10	1	1.26e-8	1.26e-8	YPK3	Heatshock	overestimated
RGM1	252	1	7.509e-11	1.502e-10	1	1.322e-8	1.322e-8	TPK123	Salt	overestimated
REI1	1472	1	8.264e-11	1.653e-10	1	1.455e-8	1.455e-8	YPK1	Menadione	underestimated
HAC1	349	1	9.028e-11	1.806e-10	1	1.589e-8	1.589e-8	IRE1	Tunicamycin	overestimated
GIS1	259	1	9.234e-11	1.847e-10	1	1.625e-8	1.625e-8	WT1	Menadione	overestimated
SUM1	681	1	1.055e-10	2.111e-10	1	1.857e-8	1.857e-8	RIM11	Heatshock	underestimated
GIS1	164	1	1.385e-10	2.77e-10	1	2.437e-8	2.437e-8	YPK1	Tunicamycin	overestimated
RAP1	105	1	1.538e-10	3.075e-10	1	2.706e-8	2.706e-8	TPK123	Fluconazole	overestimated
YER130C	1472	1	1.772e-10	3.544e-10	1	3.118e-8	3.118e-8	YPK1	Menadione	underestimated
MSN4	392	1	1.786e-10	3.572e-10	1	3.143e-8	3.143e-8	KIN1	Menadione	overestimated
GCN4	127	1	1.95e-10	3.901e-10	1	3.433e-8	3.433e-8	PBS2	GlucoseDepletion	underestimated
MSN4	359	1	2.082e-10	4.164e-10	1	3.664e-8	3.664e-8	YPK3	Heatshock	overestimated
CRZ1	183	1	2.365e-10	4.73e-10	1	4.162e-8	4.162e-8	CDC15	Heatshock	overestimated
MSN2	392	1	2.693e-10	5.387e-10	1	4.74e-8	4.74e-8	KIN1	Menadione	overestimated
USV1	1494	1	3.019e-10	6.038e-10	1	5.314e-8	5.314e-8	SCH9	Menadione	underestimated
REI1	573	1	3.213e-10	6.427e-10	1	5.656e-8	5.656e-8	YPK1	Heatshock	overestimated
SUT1	359	1	3.707e-10	7.414e-10	1	6.524e-8	6.524e-8	YPK3	Heatshock	overestimated
SUT1	170	1	5.351e-10	1.07e-9	1	9.418e-8	9.418e-8	SCH9	YPD	overestimated
RPH1	164	1	6.57e-10	1.314e-9	1	1.156e-7	1.156e-7	YPK1	Tunicamycin	overestimated
RPH1	392	1	6.981e-10	1.396e-9	1	1.229e-7	1.229e-7	KIN1	Menadione	overestimated
RGM1	392	1	8.062e-10	1.612e-9	1	1.419e-7	1.419e-7	KIN1	Menadione	overestimated
GIS1	392	1	1.031e-9	2.061e-9	1	1.814e-7	1.814e-7	KIN1	Menadione	overestimated
PHO2	1100	1	1.112e-9	2.223e-9	1	1.957e-7	1.957e-7	SCH9	Menadione	overestimated
GIS1	359	1	1.22e-9	2.441e-9	1	2.148e-7	2.148e-7	YPK3	Heatshock	overestimated
MSN4	259	1	1.79e-9	3.58e-9	1	3.15e-7	3.15e-7	WT1	Menadione	overestimated
DOT6	1100	1	1.983e-9	3.966e-9	1	3.49e-7	3.49e-7	SCH9	Menadione	overestimated
YAP7	1472	1	2.152e-9	4.304e-9	1	3.788e-7	3.788e-7	YPK1	Menadione	underestimated
MSN2	259	1	2.263e-9	4.526e-9	1	3.983e-7	3.983e-7	WT1	Menadione	overestimated
YER130C	392	1	2.263e-9	4.527e-9	1	3.984e-7	3.984e-7	KIN1	Menadione	overestimated
MBP1	38	1	2.36e-9	4.72e-9	1	4.154e-7	4.154e-7	TPK123	YPD	underestimated
MSN4	183	1	2.774e-9	5.548e-9	1	4.882e-7	4.882e-7	CDC15	Heatshock	overestimated
RGM1	359	1	2.912e-9	5.824e-9	1	5.125e-7	5.125e-7	YPK3	Heatshock	overestimated
TOD6	1100	1	3.056e-9	6.111e-9	1	5.378e-7	5.378e-7	SCH9	Menadione	overestimated
PDR1	359	1	3.448e-9	6.895e-9	1	6.068e-7	6.068e-7	YPK3	Heatshock	overestimated
SUM1	1075	1	3.702e-9	7.403e-9	1	6.515e-7	6.515e-7	YPK1	Menadione	overestimated
GIS1	417	1	4.296e-9	8.591e-9	1	7.56e-7	7.56e-7	PBS2	Salt	overestimated
TDA9	275	1	4.568e-9	9.136e-9	1	8.04e-7	8.04e-7	CDC15	Menadione	underestimated
MSN2	581	1	5.083e-9	1.017e-8	1	8.945e-7	8.945e-7	CDC15	Tunicamycin	overestimated
YER130C	697	1	5.674e-9	1.135e-8	1	9.987e-7	9.987e-7	STE11	Menadione	underestimated
MBP1::SWI6	76	1	6.126e-9	1.225e-8	1	1.078e-6	1.078e-6	SCH9	YPD	underestimated
NHP10	275	1	6.662e-9	1.332e-8	1	1.172e-6	1.172e-6	CDC15	Menadione	underestimated
MBP1	199	1	7.038e-9	1.408e-8	1	1.239e-6	1.239e-6	HOG1	Salt	underestimated
RPH1	252	1	7.456e-9	1.491e-8	1	1.312e-6	1.312e-6	TPK123	Salt	overestimated
RGM1	581	1	8.064e-9	1.613e-8	1	1.419e-6	1.419e-6	CDC15	Tunicamycin	overestimated
CST6	59	1	8.329e-9	1.666e-8	1	1.466e-6	1.466e-6	YPK3	Salt	underestimated
RSC30	1494	1	8.819e-9	1.764e-8	1	1.552e-6	1.552e-6	SCH9	Menadione	underestimated
YGR067C	275	1	9.172e-9	1.834e-8	1	1.614e-6	1.614e-6	CDC15	Menadione	underestimated
AZF1	501	1	1.004e-8	2.008e-8	1	1.767e-6	1.767e-6	STE11	Menadione	overestimated
MSN2	183	1	1.004e-8	2.009e-8	1	1.768e-6	1.768e-6	CDC15	Heatshock	overestimated
MIG2	412	1	1.049e-8	2.098e-8	1	1.846e-6	1.846e-6	SSN3	Menadione	underestimated
GLN3	290	1	1.12e-8	2.239e-8	1	1.971e-6	1.971e-6	FUS3	Heatshock	underestimated
CRZ1	573	1	1.142e-8	2.284e-8	1	2.01e-6	2.01e-6	YPK1	Heatshock	overestimated
UGA3	359	1	1.201e-8	2.402e-8	1	2.114e-6	2.114e-6	YPK3	Heatshock	overestimated
SUT1	1494	1	1.38e-8	2.76e-8	1	2.429e-6	2.429e-6	SCH9	Menadione	underestimated
HAC1	62	1	1.603e-8	3.206e-8	1	2.821e-6	2.821e-6	SCH9	Tunicamycin	underestimated
CRZ1	191	1	1.84e-8	3.68e-8	1	3.239e-6	3.239e-6	SNF1	Heatshock	overestimated
RPH1	59	1	1.849e-8	3.698e-8	1	3.254e-6	3.254e-6	YPK3	Salt	underestimated
ZMS1	1494	1	1.853e-8	3.706e-8	1	3.261e-6	3.261e-6	SCH9	Menadione	underestimated
RGM1	417	1	1.88e-8	3.761e-8	1	3.309e-6	3.309e-6	PBS2	Salt	overestimated
STP1	355	1	1.917e-8	3.834e-8	1	3.374e-6	3.374e-6	YPK1	GlucoseDepletion	underestimated
GZF3	39	1	1.957e-8	3.914e-8	1	3.444e-6	3.444e-6	KSS1	Salt	underestimated
MET32	1494	1	1.989e-8	3.978e-8	1	3.501e-6	3.501e-6	SCH9	Menadione	underestimated
AZF1	489	1	2.576e-8	5.152e-8	1	4.533e-6	4.533e-6	CDC7	Salt	overestimated
MSN2	167	1	2.699e-8	5.399e-8	1	4.751e-6	4.751e-6	CTK1	Menadione	overestimated
MSN4	148	1	2.722e-8	5.443e-8	1	4.79e-6	4.79e-6	IRE1	Menadione	overestimated
STP2	359	1	2.876e-8	5.751e-8	1	5.061e-6	5.061e-6	YPK3	Heatshock	overestimated
YAP7	249	1	3.052e-8	6.104e-8	1	5.372e-6	5.372e-6	TOR2	SDC	underestimated
MIG2	275	1	3.299e-8	6.597e-8	1	5.806e-6	5.806e-6	CDC15	Menadione	underestimated
MSN4	581	1	3.299e-8	6.598e-8	1	5.806e-6	5.806e-6	CDC15	Tunicamycin	overestimated
STE12	199	1	3.463e-8	6.926e-8	1	6.095e-6	6.095e-6	HOG1	Salt	underestimated
SUT1	249	1	3.532e-8	7.064e-8	1	6.216e-6	6.216e-6	TOR2	SDC	underestimated
CBF1	123	1	3.999e-8	7.997e-8	1	7.037e-6	7.037e-6	YPK1	Tunicamycin	underestimated
REI1	581	1	4.107e-8	8.214e-8	1	7.228e-6	7.228e-6	CDC15	Tunicamycin	overestimated
SMP1	1100	1	4.115e-8	8.231e-8	1	7.243e-6	7.243e-6	SCH9	Menadione	overestimated
MSN4	252	1	4.28e-8	8.56e-8	1	7.533e-6	7.533e-6	TPK123	Salt	overestimated
CRZ1	249	1	4.299e-8	8.598e-8	1	7.566e-6	7.566e-6	TOR2	SDC	underestimated
MSN4	167	1	4.617e-8	9.235e-8	1	8.127e-6	8.127e-6	CTK1	Menadione	overestimated
CRZ1	290	1	4.718e-8	9.436e-8	1	8.304e-6	8.304e-6	FUS3	Heatshock	underestimated
SUM1	161	1	5.061e-8	1.012e-7	1	8.908e-6	8.908e-6	FUS3	Heatshock	overestimated
MIG2	1494	1	5.692e-8	1.138e-7	1	1.002e-5	1.002e-5	SCH9	Menadione	underestimated
MSN2	148	1	5.899e-8	1.18e-7	1	1.038e-5	1.038e-5	IRE1	Menadione	overestimated
RPH1	259	1	6.525e-8	1.305e-7	1	1.148e-5	1.148e-5	WT1	Menadione	overestimated
HAC1	201	1	6.828e-8	1.366e-7	1	1.202e-5	1.202e-5	SNF1	GlucoseDepletion	underestimated
HCM1	1100	1	6.844e-8	1.369e-7	1	1.205e-5	1.205e-5	SCH9	Menadione	overestimated
MSN2	252	1	7.136e-8	1.427e-7	1	1.256e-5	1.256e-5	TPK123	Salt	overestimated
MBP1	315	1	7.202e-8	1.44e-7	1	1.268e-5	1.268e-5	PBS2	Salt	underestimated
GAT1	39	1	7.349e-8	1.47e-7	1	1.293e-5	1.293e-5	KSS1	Salt	underestimated
ZMS1	164	1	8.029e-8	1.606e-7	1	1.413e-5	1.413e-5	YPK1	Tunicamycin	overestimated
DAL80	39	1	8.066e-8	1.613e-7	1	1.42e-5	1.42e-5	KSS1	Salt	underestimated
STB3	133	1	9.63e-8	1.926e-7	1	1.695e-5	1.695e-5	WT1	Menadione	underestimated
REI1	392	1	9.788e-8	1.958e-7	1	1.723e-5	1.723e-5	KIN1	Menadione	overestimated
GIS1	697	1	1.103e-7	2.207e-7	1	1.942e-5	1.942e-5	STE11	Menadione	underestimated
GIS1	462	1	1.159e-7	2.318e-7	1	2.04e-5	2.04e-5	HOG1	Salt	overestimated
YGR067C	1494	1	1.248e-7	2.497e-7	1	2.197e-5	2.197e-5	SCH9	Menadione	underestimated
MIG1	275	1	1.344e-7	2.688e-7	1	2.365e-5	2.365e-5	CDC15	Menadione	underestimated
MBP1::SWI6	581	1	1.388e-7	2.777e-7	1	2.444e-5	2.444e-5	CDC15	Tunicamycin	overestimated
GIS1	181	1	1.395e-7	2.789e-7	1	2.454e-5	2.454e-5	ATG1	Menadione	overestimated
RPH1	417	1	1.431e-7	2.862e-7	1	2.519e-5	2.519e-5	PBS2	Salt	overestimated
RPH1	181	1	1.596e-7	3.192e-7	1	2.809e-5	2.809e-5	ATG1	Menadione	overestimated
GZF3	359	1	1.63e-7	3.26e-7	1	2.869e-5	2.869e-5	YPK3	Heatshock	overestimated
YER130C	462	1	1.647e-7	3.293e-7	1	2.898e-5	2.898e-5	HOG1	Salt	overestimated
MBP1::SWI6	38	1	1.716e-7	3.432e-7	1	3.02e-5	3.02e-5	TPK123	YPD	underestimated
RPH1	697	1	1.81e-7	3.62e-7	1	3.186e-5	3.186e-5	STE11	Menadione	underestimated
STB3	501	1	1.814e-7	3.628e-7	1	3.193e-5	3.193e-5	STE11	Menadione	overestimated
YGR067C	170	1	1.82e-7	3.64e-7	1	3.203e-5	3.203e-5	SCH9	YPD	overestimated
AZF1	1075	1	1.88e-7	3.76e-7	1	3.308e-5	3.308e-5	YPK1	Menadione	overestimated
TOD6	385	1	1.958e-7	3.916e-7	1	3.446e-5	3.446e-5	SSN3	Menadione	overestimated
PDR3	359	1	2.025e-7	4.049e-7	1	3.563e-5	3.563e-5	YPK3	Heatshock	overestimated
YAP7	617	1	2.071e-7	4.143e-7	1	3.646e-5	3.646e-5	HOG1	Menadione	overestimated
RPH1	359	1	2.104e-7	4.208e-7	1	3.703e-5	3.703e-5	YPK3	Heatshock	overestimated
RGM1	167	1	2.112e-7	4.223e-7	1	3.716e-5	3.716e-5	CTK1	Menadione	overestimated
RGM1	183	1	2.116e-7	4.232e-7	1	3.724e-5	3.724e-5	CDC15	Heatshock	overestimated
RGM1	148	1	2.137e-7	4.274e-7	1	3.761e-5	3.761e-5	IRE1	Menadione	overestimated
STB3	80	1	2.14e-7	4.28e-7	1	3.766e-5	3.766e-5	SNF1	Menadione	overestimated
STB3	86	1	2.183e-7	4.365e-7	1	3.841e-5	3.841e-5	PHO85	Menadione	overestimated
HAC1	123	1	2.202e-7	4.404e-7	1	3.875e-5	3.875e-5	YPK1	Tunicamycin	underestimated
ADR1	275	1	2.307e-7	4.614e-7	1	4.06e-5	4.06e-5	CDC15	Menadione	underestimated
GCN4	355	1	2.579e-7	5.158e-7	1	4.539e-5	4.539e-5	YPK1	GlucoseDepletion	underestimated
MIG1	412	1	2.707e-7	5.415e-7	1	4.765e-5	4.765e-5	SSN3	Menadione	underestimated
CRZ1	89	1	2.84e-7	5.681e-7	1	4.999e-5	4.999e-5	MRK1	Heatshock	overestimated
RSC30	359	1	2.881e-7	5.761e-7	1	5.07e-5	5.07e-5	YPK3	Heatshock	overestimated
ZMS1	1472	1	3.02e-7	6.039e-7	1	5.315e-5	5.315e-5	YPK1	Menadione	underestimated
MBP1	181	1	3.11e-7	6.22e-7	1	5.474e-5	5.474e-5	HOG1	GlucoseDepletion	overestimated
HAP3	442	1	3.119e-7	6.238e-7	1	5.489e-5	5.489e-5	YPK1	GlucoseDepletion	overestimated
UPC2	181	1	3.203e-7	6.405e-7	1	5.636e-5	5.636e-5	HOG1	GlucoseDepletion	overestimated
USV1	1472	1	3.914e-7	7.829e-7	1	6.889e-5	6.889e-5	YPK1	Menadione	underestimated
STP1	359	1	4.037e-7	8.074e-7	1	7.105e-5	7.105e-5	YPK3	Heatshock	overestimated
TYE7	123	1	4.074e-7	8.147e-7	1	7.169e-5	7.169e-5	YPK1	Tunicamycin	underestimated
RPN4	617	1	4.095e-7	8.19e-7	1	7.207e-5	7.207e-5	HOG1	Menadione	overestimated
RSC30	85	1	4.115e-7	8.231e-7	1	7.243e-5	7.243e-5	YPK1	YPD	overestimated
RSC30	249	1	4.268e-7	8.536e-7	1	7.512e-5	7.512e-5	TOR2	SDC	underestimated
RSC3	359	1	4.331e-7	8.662e-7	1	7.622e-5	7.622e-5	YPK3	Heatshock	overestimated
TOD6	80	1	4.4710000000000003e-07	8.9420000000000005e-07	1	7.868e-5	7.868e-5	SNF1	Menadione	overestimated
RPN4	110	1	4.497e-7	8.995e-7	1	7.915e-5	7.915e-5	YPK1	YPD	underestimated
DOT6	385	1	4.668e-7	9.335e-7	1	8.215e-5	8.215e-5	SSN3	Menadione	overestimated
MIG3	412	1	4.704e-7	9.407e-7	1	8.278e-5	8.278e-5	SSN3	Menadione	underestimated
GAT1	359	1	4.931e-7	9.862e-7	1	8.678e-5	8.678e-5	YPK3	Heatshock	overestimated
RPH1	148	1	5.113e-7	1.023e-6	1	8.998e-5	8.998e-5	IRE1	Menadione	overestimated
MSN2	85	1	5.121e-7	1.024e-6	1	9.013e-5	9.013e-5	YPK1	YPD	overestimated
ADR1	1494	1	5.166e-7	1.033e-6	1	9.091e-5	9.091e-5	SCH9	Menadione	underestimated
ADR1	412	1	5.444e-7	1.089e-6	1	9.582e-5	9.582e-5	SSN3	Menadione	underestimated
YER130C	59	1	5.514e-7	1.103e-6	1	9.704e-5	9.704e-5	YPK3	Salt	underestimated
DAL82	501	1	5.775e-7	1.155e-6	1	1.016e-4	1.016e-4	STE11	Menadione	overestimated
YER130C	359	1	5.88e-7	1.176e-6	1	1.035e-4	1.035e-4	YPK3	Heatshock	overestimated
CHA4	359	1	6.034e-7	1.207e-6	1	1.062e-4	1.062e-4	YPK3	Heatshock	overestimated
MSN2	191	1	6.484e-7	1.297e-6	1	1.141e-4	1.141e-4	SNF1	Heatshock	overestimated
ZMS1	59	1	6.754e-7	1.351e-6	1	1.189e-4	1.189e-4	YPK3	Salt	underestimated
NCU00019	501	1	7.547e-7	1.509e-6	1	1.328e-4	1.328e-4	STE11	Menadione	overestimated
YAP7	259	1	7.563e-7	1.513e-6	1	1.331e-4	1.331e-4	WT1	Menadione	overestimated
SUT1	83	1	7.787e-7	1.557e-6	1	1.37e-4	1.37e-4	WT3	Menadione	underestimated
USV1	59	1	8.148e-7	1.63e-6	1	1.434e-4	1.434e-4	YPK3	Salt	underestimated
YGR067C	164	1	8.314e-7	1.663e-6	1	1.463e-4	1.463e-4	YPK1	Tunicamycin	overestimated
MBP1::SWI6	41	1	8.555e-7	1.711e-6	1	1.505e-4	1.505e-4	IRE1	Salt	overestimated
MBP1::SWI6	501	1	8.862e-7	1.772e-6	1	1.56e-4	1.56e-4	STE11	Menadione	overestimated
NHP10	412	1	9.565e-7	1.913e-6	1	1.683e-4	1.683e-4	SSN3	Menadione	underestimated
FKH2	1100	1	9.604e-7	1.921e-6	1	1.69e-4	1.69e-4	SCH9	Menadione	overestimated
YGR067C	359	1	9.96e-7	1.992e-6	1	1.753e-4	1.753e-4	YPK3	Heatshock	overestimated
RPN4	130	1	1.015e-6	2.031e-6	1	1.787e-4	1.787e-4	SCH9	Azetidine	overestimated
RPN4	1472	1	1.05e-6	2.099e-6	1	1.847e-4	1.847e-4	YPK1	Menadione	underestimated
GCN4	84	1	1.061e-6	2.122e-6	1	1.867e-4	1.867e-4	YPK1	Azetidine	overestimated
IME1	359	1	1.079e-6	2.159e-6	1	1.9e-4	1.9e-4	YPK3	Heatshock	overestimated
MBP1	501	1	1.092e-6	2.183e-6	1	1.921e-4	1.921e-4	STE11	Menadione	overestimated
PDR8	69	1	1.096e-6	2.191e-6	1	1.928e-4	1.928e-4	SSN3	Heatshock	overestimated
ABF1	92	1	1.108e-6	2.216e-6	1	1.95e-4	1.95e-4	KIN1	Tunicamycin	overestimated
TDA9	1472	1	1.204e-6	2.409e-6	1	2.12e-4	2.12e-4	YPK1	Menadione	underestimated
AZF1	401	1	1.238e-6	2.475e-6	1	2.178e-4	2.178e-4	RIM15	SDC	overestimated
USV1	573	1	1.302e-6	2.603e-6	1	2.291e-4	2.291e-4	YPK1	Heatshock	overestimated
GAT1	191	1	1.303e-6	2.607e-6	1	2.294e-4	2.294e-4	SNF1	Heatshock	overestimated
MIG2	1472	1	1.352e-6	2.704e-6	1	2.379e-4	2.379e-4	YPK1	Menadione	underestimated
TDA9	170	1	1.362e-6	2.723e-6	1	2.396e-4	2.396e-4	SCH9	YPD	overestimated
REI1	164	1	1.371e-6	2.742e-6	1	2.413e-4	2.413e-4	YPK1	Tunicamycin	overestimated
NHP10	1494	1	1.411e-6	2.823e-6	1	2.484e-4	2.484e-4	SCH9	Menadione	underestimated
PHO2	161	1	1.5e-6	2.999e-6	1	2.639e-4	2.639e-4	FUS3	Heatshock	overestimated
ACE2	239	1	1.503e-6	3.005e-6	1	2.644e-4	2.644e-4	MRK1	Azetidine	underestimated
MBP1::SWI6	315	1	1.523e-6	3.046e-6	1	2.68e-4	2.68e-4	PBS2	Salt	underestimated
MIG3	275	1	1.555e-6	3.11e-6	1	2.736e-4	2.736e-4	CDC15	Menadione	underestimated
RGM1	181	1	1.59e-6	3.181e-6	1	2.799e-4	2.799e-4	ATG1	Menadione	overestimated
NHP10	85	1	1.592e-6	3.185e-6	1	2.802e-4	2.802e-4	YPK1	YPD	overestimated
MIG2	170	1	1.596e-6	3.192e-6	1	2.808e-4	2.808e-4	SCH9	YPD	overestimated
STB3	161	1	1.648e-6	3.297e-6	1	2.901e-4	2.901e-4	FUS3	Heatshock	overestimated
GIS1	167	1	1.667e-6	3.334e-6	1	2.933e-4	2.933e-4	CTK1	Menadione	overestimated
RSC3	130	1	1.745e-6	3.49e-6	1	3.071e-4	3.071e-4	SCH9	Azetidine	overestimated
RGM1	697	1	1.778e-6	3.557e-6	1	3.129e-4	3.129e-4	STE11	Menadione	underestimated
REI1	59	1	1.797e-6	3.595e-6	1	3.163e-4	3.163e-4	YPK3	Salt	underestimated
DAL80	359	1	1.867e-6	3.733e-6	1	3.285e-4	3.285e-4	YPK3	Heatshock	overestimated
MSN2	417	1	1.873e-6	3.745e-6	1	3.295e-4	3.295e-4	PBS2	Salt	overestimated
GIS1	148	1	1.884e-6	3.767e-6	1	3.315e-4	3.315e-4	IRE1	Menadione	overestimated
GLN3	191	1	1.956e-6	3.912e-6	1	3.442e-4	3.442e-4	SNF1	Heatshock	overestimated
MSN2	181	1	2e-6	4e-6	1	3.52e-4	3.52e-4	ATG1	Menadione	overestimated
MSN2	697	1	2.134e-6	4.267e-6	1	3.755e-4	3.755e-4	STE11	Menadione	underestimated
RSC3	76	1	2.152e-6	4.304e-6	1	3.786e-4	3.786e-4	SCH9	YPD	underestimated
MIG3	1494	1	2.153e-6	4.306e-6	1	3.789e-4	3.789e-4	SCH9	Menadione	underestimated
MET32	167	1	2.164e-6	4.328e-6	1	3.808e-4	3.808e-4	CTK1	Menadione	overestimated
RTG3	110	1	2.17e-6	4.34e-6	1	3.819e-4	3.819e-4	YPK1	YPD	underestimated
MSN4	191	1	2.208e-6	4.416e-6	1	3.885e-4	3.885e-4	SNF1	Heatshock	overestimated
RSC30	581	1	2.232e-6	4.465e-6	1	3.928e-4	3.928e-4	CDC15	Tunicamycin	overestimated
USV1	164	1	2.268e-6	4.536e-6	1	3.991e-4	3.991e-4	YPK1	Tunicamycin	overestimated
TDA9	183	1	2.464e-6	4.928e-6	1	4.336e-4	4.336e-4	CDC15	Heatshock	overestimated
MSN4	697	1	2.507e-6	5.014e-6	1	4.412e-4	4.412e-4	STE11	Menadione	underestimated
MBP1::SWI6	199	1	2.551e-6	5.101e-6	1	4.488e-4	4.488e-4	HOG1	Salt	underestimated
MIG1	1494	1	2.568e-6	5.135e-6	1	4.518e-4	4.518e-4	SCH9	Menadione	underestimated
TDA9	412	1	2.599e-6	5.198e-6	1	4.573e-4	4.573e-4	SSN3	Menadione	underestimated
TYE7	181	1	2.637e-6	5.274e-6	1	4.64e-4	4.64e-4	HOG1	GlucoseDepletion	overestimated
RSC3	85	1	2.642e-6	5.284e-6	1	4.649e-4	4.649e-4	YPK1	YPD	overestimated
DAL81	359	1	2.713e-6	5.425e-6	1	4.773e-4	4.773e-4	YPK3	Heatshock	overestimated
GLN3	39	1	2.747e-6	5.494e-6	1	4.834e-4	4.834e-4	KSS1	Salt	underestimated
MSN2	365	1	2.748e-6	5.496e-6	1	4.835e-4	4.835e-4	YPK3	Menadione	overestimated
RGM1	462	1	2.821e-6	5.643e-6	1	4.964e-4	4.964e-4	HOG1	Salt	overestimated
MET32	181	1	2.837e-6	5.673e-6	1	4.991e-4	4.991e-4	HOG1	GlucoseDepletion	overestimated
TDA9	359	1	2.849e-6	5.697e-6	1	5.013e-4	5.013e-4	YPK3	Heatshock	overestimated
RGM1	191	1	2.879e-6	5.757e-6	1	5.065e-4	5.065e-4	SNF1	Heatshock	overestimated
MSN4	417	1	2.9e-6	5.8e-6	1	5.103e-4	5.103e-4	PBS2	Salt	overestimated
SUM1	501	1	2.974e-6	5.947e-6	1	5.232e-4	5.232e-4	STE11	Menadione	overestimated
YKL222C	69	1	3.0920000000000002e-06	6.185e-6	1	5.441e-4	5.441e-4	SSN3	Heatshock	overestimated
GZF3	419	1	3.146e-6	6.292e-6	1	5.536e-4	5.536e-4	TOR2	SDC	overestimated
GCN4	59	1	3.289e-6	6.577e-6	1	5.786e-4	5.786e-4	KSP1	Tunicamycin	underestimated
NHP10	170	1	3.319e-6	6.638e-6	1	5.84e-4	5.84e-4	SCH9	YPD	overestimated
NHP6B	1100	1	3.322e-6	6.643e-6	1	5.844e-4	5.844e-4	SCH9	Menadione	overestimated
CRZ1	41	1	3.371e-6	6.743e-6	1	5.932e-4	5.932e-4	PBS2	SDC	underestimated
YPR022C	1494	1	3.458e-6	6.915e-6	1	6.084e-4	6.084e-4	SCH9	Menadione	underestimated
RDS1	1494	1	3.581e-6	7.163e-6	1	6.301e-4	6.301e-4	SCH9	Menadione	underestimated
AZF1	265	1	3.592e-6	7.185e-6	1	6.321e-4	6.321e-4	ATG1	Menadione	underestimated
GIS1	183	1	3.645e-6	7.29e-6	1	6.413e-4	6.413e-4	CDC15	Heatshock	overestimated
MSN4	181	1	3.68e-6	7.361e-6	1	6.475e-4	6.475e-4	ATG1	Menadione	overestimated
PHO2	385	1	3.749e-6	7.497e-6	1	6.595e-4	6.595e-4	SSN3	Menadione	overestimated
RSC3	581	1	3.754e-6	7.507e-6	1	6.604e-4	6.604e-4	CDC15	Tunicamycin	overestimated
STP2	249	1	3.755e-6	7.51e-6	1	6.607e-4	6.607e-4	TOR2	SDC	underestimated
IME1	170	1	3.762e-6	7.525e-6	1	6.62e-4	6.62e-4	SCH9	YPD	overestimated
UPC2	115	1	4.007e-6	8.013e-6	1	7.049e-4	7.049e-4	HOG1	SDC	overestimated
SUT1	85	1	4.076e-6	8.152e-6	1	7.171e-4	7.171e-4	YPK1	YPD	overestimated
GAT1	290	1	4.252e-6	8.504e-6	1	7.481e-4	7.481e-4	FUS3	Heatshock	underestimated
FKH1	1075	1	4.355e-6	8.71e-6	1	7.662e-4	7.662e-4	YPK1	Menadione	overestimated
YER130C	417	1	4.421e-6	8.843e-6	1	7.778e-4	7.778e-4	PBS2	Salt	overestimated
MSN4	97	1	4.499e-6	8.997e-6	1	7.915e-4	7.915e-4	PKC1	Menadione	underestimated
SFP1	133	1	4.51e-6	9.019e-6	1	7.934e-4	7.934e-4	WT1	Menadione	underestimated
MSN2	45	1	4.65e-6	9.301e-6	1	8.181e-4	8.181e-4	SCH9	Heatshock	overestimated
RSC30	130	1	4.717e-6	9.433e-6	1	8.298e-4	8.298e-4	SCH9	Azetidine	overestimated
CAD1	617	1	4.729e-6	9.458e-6	1	8.32e-4	8.32e-4	HOG1	Menadione	overestimated
SPT23	1100	1	4.961e-6	9.922e-6	1	8.727e-4	8.727e-4	SCH9	Menadione	overestimated
MET28	239	1	5.033e-6	1.007e-5	1	8.855e-4	8.855e-4	MRK1	Azetidine	underestimated
MET4	155	1	5.084e-6	1.017e-5	1	8.944e-4	8.944e-4	TPK123	Heatshock	underestimated
UGA3	130	1	5.218e-6	1.044e-5	1	9.179e-4	9.179e-4	SCH9	Azetidine	overestimated
RDS1	170	1	5.226e-6	1.045e-5	1	9.194e-4	9.194e-4	SCH9	YPD	overestimated
YER130C	259	1	5.405e-6	1.081e-5	1	9.507e-4	9.507e-4	WT1	Menadione	overestimated
RSC30	1472	1	5.495e-6	1.099e-5	1	9.667e-4	9.667e-4	YPK1	Menadione	underestimated
TDA9	249	1	5.576e-6	1.115e-5	1	9.808e-4	9.808e-4	TOR2	SDC	underestimated
MIG2	164	1	5.711e-6	1.142e-5	1	0.001005	0.001005	YPK1	Tunicamycin	overestimated
STP2	355	1	5.871e-6	1.174e-5	1	0.001033	0.001033	YPK1	GlucoseDepletion	underestimated
MSN4	365	1	5.935e-6	1.187e-5	1	0.001044	0.001044	YPK3	Menadione	overestimated
YER130C	181	1	5.986e-6	1.197e-5	1	0.001053	0.001053	ATG1	Menadione	overestimated
RPH1	183	1	6.041e-6	1.208e-5	1	0.001063	0.001063	CDC15	Heatshock	overestimated
CRZ1	115	1	6.065e-6	1.213e-5	1	0.001067	0.001067	HOG1	SDC	overestimated
RPH1	167	1	6.071e-6	1.214e-5	1	0.001068	0.001068	CTK1	Menadione	overestimated
RSC30	170	1	6.177e-6	1.235e-5	1	0.001087	0.001087	SCH9	YPD	overestimated
RTG3	130	1	6.42e-6	1.284e-5	1	0.001129	0.001129	SCH9	Azetidine	overestimated
TOD6	44	1	6.454e-6	1.291e-5	1	0.001135	0.001135	TPK123	YPD	overestimated
REI1	697	1	6.484e-6	1.297e-5	1	0.00114	0.00114	STE11	Menadione	underestimated
REI1	45	1	6.595e-6	1.319e-5	1	0.00116	0.00116	SCH9	Heatshock	overestimated
MSN4	85	1	6.637e-6	1.327e-5	1	0.001167	0.001167	YPK1	YPD	overestimated
TDA9	164	1	6.664e-6	1.333e-5	1	0.001172	0.001172	YPK1	Tunicamycin	overestimated
USV1	697	1	6.685e-6	1.337e-5	1	0.001176	0.001176	STE11	Menadione	underestimated
DAL80	191	1	6.704e-6	1.341e-5	1	0.001179	0.001179	SNF1	Heatshock	overestimated
TDA9	59	1	6.917e-6	1.383e-5	1	0.001217	0.001217	YPK3	Salt	underestimated
RGM1	259	1	6.977e-6	1.395e-5	1	0.001227	0.001227	WT1	Menadione	overestimated
RGM1	26	1	7.063e-6	1.413e-5	1	0.001242	0.001242	IRE1	Salt	underestimated
CBF1	181	1	7.113e-6	1.423e-5	1	0.001251	0.001251	HOG1	GlucoseDepletion	overestimated
ABF1	365	1	7.216e-6	1.443e-5	1	0.001269	0.001269	YPK3	Menadione	overestimated
OAF1	412	1	7.254e-6	1.451e-5	1	0.001276	0.001276	SSN3	Menadione	underestimated
DAL80	419	1	7.553e-6	1.511e-5	1	0.001328	0.001328	TOR2	SDC	overestimated
PHO2	555	1	7.622e-6	1.524e-5	1	0.001341	0.001341	MRK1	Azetidine	overestimated
MBP1::SWI6	34	1	7.626e-6	1.525e-5	1	0.001341	0.001341	TPK123	Tunicamycin	underestimated
REI1	259	1	7.748e-6	1.55e-5	1	0.001363	0.001363	WT1	Menadione	overestimated
SPT15	170	1	7.791e-6	1.558e-5	1	0.00137	0.00137	SCH9	YPD	overestimated
IME1	1494	1	8.028e-6	1.606e-5	1	0.001412	0.001412	SCH9	Menadione	underestimated
RSC3	34	1	8.029e-6	1.606e-5	1	0.001412	0.001412	TPK123	Tunicamycin	underestimated
YGR067C	183	1	8.068e-6	1.614e-5	1	0.001419	0.001419	CDC15	Heatshock	overestimated
GIS1	41	1	8.143e-6	1.629e-5	1	0.001432	0.001432	TPK123	Azetidine	underestimated
YHP1	333	1	8.337e-6	1.667e-5	1	0.001466	0.001466	RIM15	Fluconazole	overestimated
NCU00019	1075	1	8.375e-6	1.675e-5	1	0.001473	0.001473	YPK1	Menadione	overestimated
OAF1	275	1	8.431e-6	1.686e-5	1	0.001483	0.001483	CDC15	Menadione	underestimated
GAT1	419	1	8.566e-6	1.713e-5	1	0.001506	0.001506	TOR2	SDC	overestimated
MIG3	359	1	8.562e-6	1.712e-5	1	0.001506	0.001506	YPK3	Heatshock	overestimated
SMP1	333	1	8.637e-6	1.727e-5	1	0.001519	0.001519	RIM15	Fluconazole	overestimated
UGA3	355	1	8.779e-6	1.756e-5	1	0.001544	0.001544	YPK1	GlucoseDepletion	underestimated
AFT2	1494	1	9.11e-6	1.822e-5	1	0.001602	0.001602	SCH9	Menadione	underestimated
UPC2	197	1	9.238e-6	1.848e-5	1	0.001625	0.001625	HOG1	Menadione	underestimated
HAP5	442	1	9.322e-6	1.864e-5	1	0.001639	0.001639	YPK1	GlucoseDepletion	overestimated
DAL80	290	1	9.437e-6	1.887e-5	1	0.00166	0.00166	FUS3	Heatshock	underestimated
RLM1	37	1	9.446e-6	1.889e-5	1	0.001661	0.001661	SLT2	Salt	underestimated
RSC3	199	1	9.474e-6	1.895e-5	1	0.001666	0.001666	HOG1	Salt	underestimated
SUT1	355	1	9.963e-6	1.993e-5	1	0.001752	0.001752	YPK1	GlucoseDepletion	underestimated
RDS1	359	1	1.015e-5	2.031e-5	1	0.001785	0.001785	YPK3	Heatshock	overestimated
TEA1	85	1	1.017e-5	2.035e-5	1	0.001789	0.001789	YPK1	YPD	overestimated
MET31	167	1	1.029e-5	2.057e-5	1	0.001809	0.001809	CTK1	Menadione	overestimated
USV1	181	1	1.047e-5	2.093e-5	1	0.00184	0.00184	ATG1	Menadione	overestimated
ADR1	164	1	1.046e-5	2.092e-5	1	0.00184	0.00184	YPK1	Tunicamycin	overestimated
RSC30	412	1	1.077e-5	2.154e-5	1	0.001894	0.001894	SSN3	Menadione	underestimated
GZF3	290	1	1.08e-5	2.16e-5	1	0.001899	0.001899	FUS3	Heatshock	underestimated
NHP10	359	1	1.109e-5	2.218e-5	1	0.00195	0.00195	YPK3	Heatshock	overestimated
SUT1	365	1	1.114e-5	2.229e-5	1	0.001959	0.001959	YPK3	Menadione	overestimated
MIG2	85	1	1.122e-5	2.245e-5	1	0.001974	0.001974	YPK1	YPD	overestimated
CUP2	783	1	1.136e-5	2.273e-5	1	0.001998	0.001998	YPK1	Heatshock	underestimated
MIG1	170	1	1.16e-5	2.321e-5	1	0.00204	0.00204	SCH9	YPD	overestimated
DOT6	80	1	1.16e-5	2.321e-5	1	0.00204	0.00204	SNF1	Menadione	overestimated
CRZ1	252	1	1.163e-5	2.326e-5	1	0.002045	0.002045	RIM15	SDC	underestimated
YGR067C	412	1	1.227e-5	2.454e-5	1	0.002157	0.002157	SSN3	Menadione	underestimated
MSN2	97	1	1.26e-5	2.519e-5	1	0.002215	0.002215	PKC1	Menadione	underestimated
RSC3	38	1	1.276e-5	2.552e-5	1	0.002243	0.002243	TPK123	YPD	underestimated
SKN7	1494	1	1.278e-5	2.555e-5	1	0.002246	0.002246	SCH9	Menadione	underestimated
YHP1	555	1	1.284e-5	2.567e-5	1	0.002257	0.002257	MRK1	Azetidine	overestimated
RTG3	17	1	1.29e-5	2.58e-5	1	0.002268	0.002268	PHO85	Heatshock	underestimated
SPT2	527	1	1.299e-5	2.598e-5	1	0.002284	0.002284	RIM11	Heatshock	overestimated
YER130C	252	1	1.318e-5	2.636e-5	1	0.002317	0.002317	TPK123	Salt	overestimated
HAC1	581	1	1.338e-5	2.676e-5	1	0.002352	0.002352	CDC15	Tunicamycin	overestimated
GZF3	191	1	1.338e-5	2.675e-5	1	0.002352	0.002352	SNF1	Heatshock	overestimated
OAF1	170	1	1.357e-5	2.714e-5	1	0.002386	0.002386	SCH9	YPD	overestimated
ARG81	127	1	1.362e-5	2.723e-5	1	0.002394	0.002394	PBS2	GlucoseDepletion	underestimated
MIG2	359	1	1.412e-5	2.823e-5	1	0.002481	0.002481	YPK3	Heatshock	overestimated
YLL054C	130	1	1.463e-5	2.925e-5	1	0.002571	0.002571	SCH9	Azetidine	overestimated
PHO2	333	1	1.489e-5	2.978e-5	1	0.002618	0.002618	RIM15	Fluconazole	overestimated
PDR3	183	1	1.514e-5	3.028e-5	1	0.002661	0.002661	CDC15	Heatshock	overestimated
MBP1	209	1	1.551e-5	3.102e-5	1	0.002726	0.002726	PBS2	Menadione	overestimated
HAC1	130	1	1.552e-5	3.103e-5	1	0.002727	0.002727	SCH9	Azetidine	overestimated
SWI5	239	1	1.555e-5	3.109e-5	1	0.002733	0.002733	MRK1	Azetidine	underestimated
HCM1	501	1	1.59e-5	3.179e-5	1	0.002794	0.002794	STE11	Menadione	overestimated
MBP1::SWI6	62	1	1.598e-5	3.196e-5	1	0.002808	0.002808	SCH9	Tunicamycin	underestimated
UPC2	55	1	1.611e-5	3.223e-5	1	0.002832	0.002832	HOG1	Fluconazole	underestimated
MBP1	130	1	1.635e-5	3.271e-5	1	0.002874	0.002874	SCH9	Azetidine	overestimated
STB3	63	1	1.651e-5	3.301e-5	1	0.002901	0.002901	RIM15	Menadione	underestimated
DAL82	355	1	1.655e-5	3.309e-5	1	0.002908	0.002908	YPK1	GlucoseDepletion	underestimated
ZMS1	359	1	1.658e-5	3.315e-5	1	0.002913	0.002913	YPK3	Heatshock	overestimated
MBP1	62	1	1.663e-5	3.325e-5	1	0.002922	0.002922	SCH9	Tunicamycin	underestimated
NHP6A	1100	1	1.688e-5	3.376e-5	1	0.002966	0.002966	SCH9	Menadione	overestimated
SFP1	161	1	1.697e-5	3.393e-5	1	0.002982	0.002982	FUS3	Heatshock	overestimated
RGM1	41	1	1.719e-5	3.437e-5	1	0.00302	0.00302	TPK123	Azetidine	underestimated
CBF1	130	1	1.751e-5	3.503e-5	1	0.003078	0.003078	SCH9	Azetidine	overestimated
PHO2	783	1	1.761e-5	3.522e-5	1	0.003095	0.003095	YPK1	Heatshock	underestimated
YLR278C	412	1	1.799e-5	3.598e-5	1	0.003161	0.003161	SSN3	Menadione	underestimated
RGM1	155	1	1.814e-5	3.628e-5	1	0.003188	0.003188	TPK123	Heatshock	underestimated
YER130C	148	1	1.825e-5	3.65e-5	1	0.003207	0.003207	IRE1	Menadione	overestimated
GLN3	359	1	1.847e-5	3.695e-5	1	0.003246	0.003246	YPK3	Heatshock	overestimated
RSC3	355	1	1.861e-5	3.721e-5	1	0.003269	0.003269	YPK1	GlucoseDepletion	underestimated
MBP1::SWI6	130	1	1.878e-5	3.757e-5	1	0.0033	0.0033	SCH9	Azetidine	overestimated
NHP10	59	1	1.895e-5	3.79e-5	1	0.00333	0.00333	YPK3	Salt	underestimated
SUM1	133	1	1.917e-5	3.833e-5	1	0.003368	0.003368	WT1	Menadione	underestimated
DAL81	249	1	1.948e-5	3.896e-5	1	0.003423	0.003423	TOR2	SDC	underestimated
SFP1	1075	1	1.965e-5	3.93e-5	1	0.003452	0.003452	YPK1	Menadione	overestimated
MSN4	26	1	2.035e-5	4.07e-5	1	0.003575	0.003575	IRE1	Salt	underestimated
MBP1	34	1	2.12e-5	4.24e-5	1	0.003724	0.003724	TPK123	Tunicamycin	underestimated
MET31	130	1	2.161e-5	4.322e-5	1	0.003796	0.003796	SCH9	Azetidine	overestimated
RSC3	83	1	2.161e-5	4.322e-5	1	0.003796	0.003796	WT3	Menadione	underestimated
GCN4	193	1	2.162e-5	4.325e-5	1	0.003798	0.003798	TOR2	GlucoseDepletion	underestimated
GLN3	419	1	2.173e-5	4.346e-5	1	0.003818	0.003818	TOR2	SDC	overestimated
MOT2	170	1	2.2e-5	4.4e-5	1	0.003865	0.003865	SCH9	YPD	overestimated
MSN4	45	1	2.243e-5	4.486e-5	1	0.00394	0.00394	SCH9	Heatshock	overestimated
GCN4	19	1	2.263e-5	4.525e-5	1	0.003974	0.003974	KSP1	Menadione	overestimated
RSC30	365	1	2.293e-5	4.587e-5	1	0.004028	0.004028	YPK3	Menadione	overestimated
CBF1	201	1	2.331e-5	4.661e-5	1	0.004093	0.004093	SNF1	GlucoseDepletion	underestimated
MSN2	26	1	2.332e-5	4.663e-5	1	0.004095	0.004095	IRE1	Salt	underestimated
AFT2	183	1	2.342e-5	4.683e-5	1	0.004113	0.004113	CDC15	Heatshock	overestimated
LEU3	33	1	2.45e-5	4.9e-5	1	0.004303	0.004303	FUS3	GlucoseDepletion	overestimated
PDR1	183	1	2.521e-5	5.042e-5	1	0.004427	0.004427	CDC15	Heatshock	overestimated
RAP1	338	1	2.559e-5	5.117e-5	1	0.004493	0.004493	CDC5	Tunicamycin	overestimated
CRZ1	581	1	2.604e-5	5.208e-5	1	0.004573	0.004573	CDC15	Tunicamycin	overestimated
RDS2	170	1	2.608e-5	5.215e-5	1	0.004579	0.004579	SCH9	YPD	overestimated
CRZ1	130	1	2.624e-5	5.249e-5	1	0.004608	0.004608	SCH9	Azetidine	overestimated
YRM1	69	1	2.635e-5	5.27e-5	1	0.004627	0.004627	SSN3	Heatshock	overestimated
ARG80	193	1	2.692e-5	5.385e-5	1	0.004727	0.004727	TOR2	GlucoseDepletion	underestimated
YER130C	581	1	2.697e-5	5.394e-5	1	0.004736	0.004736	CDC15	Tunicamycin	overestimated
ADR1	1472	1	2.708e-5	5.416e-5	1	0.004755	0.004755	YPK1	Menadione	underestimated
MIG1	359	1	2.793e-5	5.586e-5	1	0.004904	0.004904	YPK3	Heatshock	overestimated
YGR067C	1472	1	2.818e-5	5.636e-5	1	0.004947	0.004947	YPK1	Menadione	underestimated
CRZ1	1494	1	2.938e-5	5.876e-5	1	0.005157	0.005157	SCH9	Menadione	underestimated
CAD1	1472	1	2.942e-5	5.884e-5	1	0.005165	0.005165	YPK1	Menadione	underestimated
SUT1	412	1	2.968e-5	5.937e-5	1	0.005211	0.005211	SSN3	Menadione	underestimated
NHP6B	385	1	3.003e-5	6.005e-5	1	0.005271	0.005271	SSN3	Menadione	overestimated
STP2	315	1	3.04e-5	6.079e-5	1	0.005336	0.005336	PBS2	Salt	underestimated
RGM1	109	1	3.057e-5	6.113e-5	1	0.005365	0.005365	TOR2	GlucoseDepletion	overestimated
NHP10	1472	1	3.156e-5	6.312e-5	1	0.005539	0.005539	YPK1	Menadione	underestimated
UGA3	249	1	3.216e-5	6.432e-5	1	0.005644	0.005644	TOR2	SDC	underestimated
GIS1	26	1	3.224e-5	6.448e-5	1	0.005658	0.005658	IRE1	Salt	underestimated
GIS1	155	1	3.228e-5	6.456e-5	1	0.005665	0.005665	TPK123	Heatshock	underestimated
SPT2	333	1	3.231e-5	6.463e-5	1	0.005671	0.005671	RIM15	Fluconazole	overestimated
MBP1	83	1	3.27e-5	6.539e-5	1	0.005738	0.005738	YPK3	Salt	overestimated
MBP1	41	1	3.27e-5	6.541e-5	1	0.005739	0.005739	IRE1	Salt	overestimated
SWI4	199	1	3.3e-5	6.6e-5	1	0.005791	0.005791	HOG1	Salt	underestimated
HCM1	1075	1	3.305e-5	6.609e-5	1	0.005799	0.005799	YPK1	Menadione	overestimated
HCM1	540	1	3.322e-5	6.645e-5	1	0.00583	0.00583	RIM11	Azetidine	overestimated
RGM1	45	1	3.345e-5	6.69e-5	1	0.00587	0.00587	SCH9	Heatshock	overestimated
CST6	462	1	3.361e-5	6.722e-5	1	0.005898	0.005898	HOG1	Salt	overestimated
SIP4	412	1	3.386e-5	6.772e-5	1	0.005942	0.005942	SSN3	Menadione	underestimated
STP1	128	1	3.39e-5	6.78e-5	1	0.005949	0.005949	TPK123	Heatshock	overestimated
MIG1	85	1	3.416e-5	6.832e-5	1	0.005995	0.005995	YPK1	YPD	overestimated
CAD1	259	1	3.529e-5	7.059e-5	1	0.006192	0.006192	WT1	Menadione	overestimated
UME6	249	1	3.592e-5	7.184e-5	1	0.006302	0.006302	TOR2	SDC	underestimated
AFT2	365	1	3.616e-5	7.232e-5	1	0.006344	0.006344	YPK3	Menadione	overestimated
UPC2	111	1	3.642e-5	7.285e-5	1	0.00639	0.00639	HOG1	Azetidine	underestimated
ABF1	91	1	3.755e-5	7.509e-5	1	0.006586	0.006586	RIM15	Fluconazole	underestimated
MBP1	581	1	3.781e-5	7.561e-5	1	0.006632	0.006632	CDC15	Tunicamycin	overestimated
DAL82	127	1	3.817e-5	7.634e-5	1	0.006695	0.006695	PBS2	GlucoseDepletion	underestimated
SUT1	33	1	3.846e-5	7.691e-5	1	0.006746	0.006746	FUS3	GlucoseDepletion	overestimated
NHP6A	385	1	3.876e-5	7.752e-5	1	0.006799	0.006799	SSN3	Menadione	overestimated
MIG2	249	1	3.998e-5	7.995e-5	1	0.007011	0.007011	TOR2	SDC	underestimated
ARG81	193	1	4.031e-5	8.061e-5	1	0.007069	0.007069	TOR2	GlucoseDepletion	underestimated
SUT1	130	1	4.103e-5	8.205e-5	1	0.007194	0.007194	SCH9	Azetidine	overestimated
HAP1	45	1	4.105e-5	8.211e-5	1	0.007199	0.007199	SCH9	Heatshock	overestimated
NRG1	183	1	4.115e-5	8.231e-5	1	0.007217	0.007217	CDC15	Heatshock	overestimated
MET31	38	1	4.128e-5	8.255e-5	1	0.007238	0.007238	TPK123	Rapamycin	overestimated
MSN4	617	1	4.163e-5	8.325e-5	1	0.0073	0.0073	HOG1	Menadione	overestimated
SUM1	63	1	4.23e-5	8.46e-5	1	0.007417	0.007417	RIM15	Menadione	underestimated
NHP10	573	1	4.317e-5	8.634e-5	1	0.007569	0.007569	YPK1	Heatshock	overestimated
MIG3	164	1	4.396e-5	8.792e-5	1	0.007707	0.007707	YPK1	Tunicamycin	overestimated
YPR022C	130	1	4.427e-5	8.854e-5	1	0.007761	0.007761	SCH9	Azetidine	overestimated
RGM1	85	1	4.451e-5	8.902e-5	1	0.007803	0.007803	YPK1	YPD	overestimated
GIS1	581	1	4.59e-5	9.179e-5	1	0.008045	0.008045	CDC15	Tunicamycin	overestimated
REI1	359	1	4.655e-5	9.309e-5	1	0.008159	0.008159	YPK3	Heatshock	overestimated
STP1	249	1	4.68e-5	9.359e-5	1	0.008202	0.008202	TOR2	SDC	underestimated
ACE2	403	1	4.816e-5	9.633e-5	1	0.008441	0.008441	RIM11	Azetidine	underestimated
CRZ1	164	1	4.851e-5	9.701e-5	1	0.008501	0.008501	YPK1	Tunicamycin	overestimated
MOT2	462	1	4.906e-5	9.812e-5	1	0.008597	0.008597	HOG1	Salt	overestimated
MIG1	164	1	4.949e-5	9.897e-5	1	0.008672	0.008672	YPK1	Tunicamycin	overestimated
LEU3	581	1	4.961e-5	9.921e-5	1	0.008693	0.008693	CDC15	Tunicamycin	overestimated
ADR1	170	1	4.965e-5	9.93e-5	1	0.0087	0.0087	SCH9	YPD	overestimated
HAL9	170	1	4.983e-5	9.967e-5	1	0.008732	0.008732	SCH9	YPD	overestimated
USV1	392	0.9999	5.024e-5	1.005e-4	1	0.008804	0.008804	KIN1	Menadione	overestimated
RDS1	249	0.9999	5.089e-5	1.018e-4	1	0.008916	0.008916	TOR2	SDC	underestimated
MIG3	85	0.9999	5.183e-5	1.037e-4	1	0.009081	0.009081	YPK1	YPD	overestimated
AZF1	85	0.9999	5.231e-5	1.046e-4	1	0.009164	0.009164	YPK1	YPD	overestimated
AFT2	59	0.9999	5.292e-5	1.058e-4	1	0.009271	0.009271	YPK3	Salt	underestimated
OAF1	69	0.9999	5.325e-5	1.065e-4	1	0.009328	0.009328	SSN3	Heatshock	overestimated
MSN4	462	0.9999	5.365e-5	1.073e-4	1	0.009398	0.009398	HOG1	Salt	overestimated
YGR067C	59	0.9999	5.611e-5	1.122e-4	1	0.009827	0.009827	YPK3	Salt	underestimated
DAL82	164	0.9999	5.656e-5	1.131e-4	1	0.009905	0.009905	SLT2	Menadione	overestimated
SFL1	84	0.9999	5.664e-5	1.133e-4	1	0.009919	0.009919	YPK1	Azetidine	overestimated
UGA3	1494	0.9999	5.866e-5	1.173e-4	1	0.01027	0.01027	SCH9	Menadione	underestimated
RPH1	191	0.9999	5.871e-5	1.174e-4	1	0.01028	0.01028	SNF1	Heatshock	overestimated
MET28	1494	0.9999	5.887e-5	1.177e-4	1	0.01031	0.01031	SCH9	Menadione	underestimated
RGM1	16	0.9999	5.925e-5	1.185e-4	1	0.01037	0.01037	RIM11	Salt	underestimated
DAL81	89	0.9999	5.944e-5	1.189e-4	1	0.01041	0.01041	MRK1	Heatshock	overestimated
PHO4	140	0.9999	5.946e-5	1.189e-4	1	0.01041	0.01041	PBS2	Menadione	underestimated
MIG3	249	0.9999	6.042e-5	1.208e-4	1	0.01058	0.01058	TOR2	SDC	underestimated
DAL81	170	0.9999	6.068e-5	1.214e-4	1	0.01062	0.01062	SCH9	YPD	overestimated
NCU00019	161	0.9999	6.072e-5	1.214e-4	1	0.01063	0.01063	FUS3	Heatshock	overestimated
MSN2	617	0.9999	6.169e-5	1.234e-4	1	0.0108	0.0108	HOG1	Menadione	overestimated
YAP7	59	0.9999	6.401e-5	1.28e-4	1	0.0112	0.0112	KSP1	Tunicamycin	underestimated
MIG3	1472	0.9999	6.553e-5	1.311e-4	1	0.01147	0.01147	YPK1	Menadione	underestimated
MET31	110	0.9999	6.763e-5	1.353e-4	1	0.01183	0.01183	YPK1	YPD	underestimated
SUT2	412	0.9999	6.785e-5	1.357e-4	1	0.01187	0.01187	SSN3	Menadione	underestimated
TDA9	26	0.9999	6.81e-5	1.362e-4	1	0.01191	0.01191	IRE1	Salt	underestimated
GIS1	231	0.9999	6.849e-5	1.37e-4	1	0.01198	0.01198	PBS2	GlucoseDepletion	overestimated
INO2	71	0.9999	6.924e-5	1.385e-4	1	0.01211	0.01211	HOG1	SDC	underestimated
NRG1	573	0.9999	7.06e-5	1.412e-4	1	0.01235	0.01235	YPK1	Heatshock	overestimated
MET4	181	0.9999	7.135e-5	1.427e-4	1	0.01248	0.01248	HOG1	GlucoseDepletion	overestimated
TDA9	85	0.9999	7.213e-5	1.443e-4	1	0.01261	0.01261	YPK1	YPD	overestimated
GIS1	191	0.9999	7.257e-5	1.451e-4	1	0.01269	0.01269	SNF1	Heatshock	overestimated
DOT6	22	0.9999	7.283e-5	1.457e-4	1	0.01274	0.01274	TPK123	Rapamycin	underestimated
TEA1	355	0.9999	7.297e-5	1.459e-4	1	0.01276	0.01276	YPK1	GlucoseDepletion	underestimated
ZMS1	85	0.9999	7.344e-5	1.469e-4	1	0.01284	0.01284	YPK1	YPD	overestimated
REI1	181	0.9999	7.346e-5	1.469e-4	1	0.01285	0.01285	ATG1	Menadione	overestimated
MET31	181	0.9999	7.353e-5	1.471e-4	1	0.01286	0.01286	HOG1	GlucoseDepletion	overestimated
REB1	681	0.9999	7.368e-5	1.474e-4	1	0.01288	0.01288	RIM11	Heatshock	underestimated
MSN2	290	0.9999	7.372e-5	1.474e-4	1	0.01289	0.01289	FUS3	Heatshock	underestimated
CHA4	193	0.9999	7.479e-5	1.496e-4	1	0.01308	0.01308	TOR2	GlucoseDepletion	underestimated
SPT23	154	0.9999	7.492e-5	1.498e-4	1	0.0131	0.0131	TOR2	Azetidine	underestimated
MIG2	183	0.9999	7.574e-5	1.515e-4	1	0.01324	0.01324	CDC15	Heatshock	overestimated
PDR1	83	0.9999	7.579e-5	1.516e-4	1	0.01325	0.01325	WT3	Menadione	underestimated
PDR3	573	0.9999	7.674e-5	1.535e-4	1	0.01342	0.01342	YPK1	Heatshock	overestimated
SMP1	555	0.9999	7.691e-5	1.538e-4	1	0.01344	0.01344	MRK1	Azetidine	overestimated
UGA3	183	0.9999	7.752e-5	1.55e-4	1	0.01355	0.01355	CDC15	Heatshock	overestimated
RSC30	59	0.9999	7.768e-5	1.554e-4	1	0.01358	0.01358	YPK3	Salt	underestimated
MIG3	170	0.9999	7.8560000000000007e-05	1.571e-4	1	0.01373	0.01373	SCH9	YPD	overestimated
CRZ1	239	0.9999	7.98e-5	1.596e-4	1	0.01395	0.01395	MRK1	Azetidine	underestimated
DOT6	44	0.9999	8.064e-5	1.613e-4	1	0.01409	0.01409	TPK123	YPD	overestimated
MOT2	164	0.9999	8.276e-5	1.655e-4	1	0.01446	0.01446	SLT2	Menadione	overestimated
PHO4	10	0.9999	8.298e-5	1.66e-4	1	0.0145	0.0145	PHO85	SDC	overestimated
RDR1	359	0.9999	8.405e-5	1.681e-4	1	0.01468	0.01468	YPK3	Heatshock	overestimated
STP1	1494	0.9999	8.462e-5	1.692e-4	1	0.01478	0.01478	SCH9	Menadione	underestimated
PDR1	170	0.9999	8.575e-5	1.715e-4	1	0.01498	0.01498	SCH9	YPD	overestimated
TOD6	63	0.9999	8.584e-5	1.717e-4	1	0.01499	0.01499	RIM15	Menadione	underestimated
USV1	167	0.9999	8.733e-5	1.747e-4	1	0.01525	0.01525	CTK1	Menadione	overestimated
AFT2	359	0.9999	8.732e-5	1.746e-4	1	0.01525	0.01525	YPK3	Heatshock	overestimated
RPN4	167	0.9999	8.767e-5	1.753e-4	1	0.01531	0.01531	CTK1	Menadione	overestimated
AZF1	338	0.9999	8.853e-5	1.771e-4	1	0.01546	0.01546	CDC5	Tunicamycin	overestimated
AZF1	681	0.9999	9.109e-5	1.822e-4	1	0.0159	0.0159	RIM11	Heatshock	underestimated
STP2	127	0.9999	9.131e-5	1.826e-4	1	0.01594	0.01594	PBS2	GlucoseDepletion	underestimated
OAF1	59	0.9999	9.139e-5	1.828e-4	1	0.01596	0.01596	YPK3	Salt	underestimated
FKH1	401	0.9999	9.153e-5	1.831e-4	1	0.01598	0.01598	RIM15	SDC	overestimated
ZMS1	183	0.9999	9.218e-5	1.844e-4	1	0.01609	0.01609	CDC15	Heatshock	overestimated
DAL81	183	0.9999	9.265e-5	1.853e-4	1	0.01617	0.01617	CDC15	Heatshock	overestimated
SFP1	501	0.9999	9.361e-5	1.872e-4	1	0.01634	0.01634	STE11	Menadione	overestimated
RPH1	462	0.9999	9.369e-5	1.874e-4	1	0.01635	0.01635	HOG1	Salt	overestimated
MET31	239	0.9999	9.468e-5	1.894e-4	1	0.01652	0.01652	MRK1	Azetidine	underestimated
RPN4	359	0.9999	9.691e-5	1.938e-4	1	0.01691	0.01691	YPK3	Heatshock	overestimated
STB3	483	0.9999	9.784e-5	1.957e-4	1	0.01707	0.01707	CDC15	Tunicamycin	underestimated
MET32	20	0.9999	9.788e-5	1.958e-4	1	0.01708	0.01708	RIM15	Heatshock	overestimated
SUT1	127	0.9999	9.808e-5	1.962e-4	1	0.01711	0.01711	PBS2	GlucoseDepletion	underestimated
REI1	85	0.9999	9.918e-5	1.984e-4	1	0.0173	0.0173	YPK1	YPD	overestimated
YER184C	128	0.9999	9.943e-5	1.989e-4	1	0.01735	0.01735	TPK123	Heatshock	overestimated
ZMS1	392	0.9999	1.002e-4	2.004e-4	1	0.01748	0.01748	KIN1	Menadione	overestimated
SWI5	403	0.9999	1.003e-4	2.005e-4	1	0.01749	0.01749	RIM11	Azetidine	underestimated
STB3	127	0.9999	1.008e-4	2.016e-4	1	0.01759	0.01759	PBS2	GlucoseDepletion	underestimated
STP2	85	0.9999	1.012e-4	2.023e-4	1	0.01765	0.01765	YPK1	YPD	overestimated
DOT6	63	0.9999	1.02e-4	2.039e-4	1	0.01779	0.01779	RIM15	Menadione	underestimated
DAL81	127	0.9999	1.024e-4	2.047e-4	1	0.01786	0.01786	PBS2	GlucoseDepletion	underestimated
FKH1	501	0.9999	1.037e-4	2.074e-4	1	0.01808	0.01808	STE11	Menadione	overestimated
CHA4	249	0.9999	1.046e-4	2.092e-4	1	0.01824	0.01824	TOR2	SDC	underestimated
ZMS1	26	0.9999	1.048e-4	2.096e-4	1	0.01827	0.01827	IRE1	Salt	underestimated
RLM1	161	0.9999	1.048e-4	2.096e-4	1	0.01828	0.01828	FUS3	Heatshock	overestimated
MSN2	44	0.9999	1.069e-4	2.138e-4	1	0.01864	0.01864	TPK123	YPD	overestimated
ZMS1	573	0.9999	1.071e-4	2.142e-4	1	0.01867	0.01867	YPK1	Heatshock	overestimated
SWI4	315	0.9999	1.074e-4	2.148e-4	1	0.01873	0.01873	PBS2	Salt	underestimated
MOT2	417	0.9999	1.091e-4	2.182e-4	1	0.01902	0.01902	PBS2	Salt	overestimated
GIS1	45	0.9999	1.095e-4	2.191e-4	1	0.01909	0.01909	SCH9	Heatshock	overestimated
SWI4	34	0.9999	1.101e-4	2.201e-4	1	0.01918	0.01918	TPK123	Tunicamycin	underestimated
NDT80	43	0.9999	1.103e-4	2.207e-4	1	0.01923	0.01923	SSN3	Salt	overestimated
DAL81	581	0.9999	1.113e-4	2.225e-4	1	0.01939	0.01939	CDC15	Tunicamycin	overestimated
YLR278C	59	0.9999	1.119e-4	2.238e-4	1	0.0195	0.0195	YPK3	Salt	underestimated
HAL9	128	0.9999	1.126e-4	2.253e-4	1	0.01963	0.01963	TPK123	Heatshock	overestimated
CUP2	501	0.9999	1.127e-4	2.254e-4	1	0.01964	0.01964	STE11	Menadione	overestimated
USV1	252	0.9999	1.133e-4	2.266e-4	1	0.01974	0.01974	TPK123	Salt	overestimated
DAL81	355	0.9999	1.133e-4	2.266e-4	1	0.01974	0.01974	YPK1	GlucoseDepletion	underestimated
RDR1	193	0.9999	1.137e-4	2.275e-4	1	0.01982	0.01982	TOR2	GlucoseDepletion	underestimated
STP2	1494	0.9999	1.144e-4	2.287e-4	1	0.01993	0.01993	SCH9	Menadione	underestimated
AZF1	34	0.9999	1.165e-4	2.33e-4	1	0.02029	0.02029	TPK123	Tunicamycin	underestimated
AZF1	540	0.9999	1.178e-4	2.355e-4	1	0.02051	0.02051	RIM11	Azetidine	overestimated
MSN2	462	0.9999	1.179e-4	2.358e-4	1	0.02053	0.02053	HOG1	Salt	overestimated
MBP1::SWI6	181	0.9999	1.196e-4	2.392e-4	1	0.02083	0.02083	HOG1	GlucoseDepletion	overestimated
MSN4	231	0.9999	1.219e-4	2.438e-4	1	0.02123	0.02123	PBS2	GlucoseDepletion	overestimated
RPH1	41	0.9999	1.229e-4	2.458e-4	1	0.0214	0.0214	TPK123	Azetidine	underestimated
CRZ1	103	0.9999	1.236e-4	2.471e-4	1	0.02151	0.02151	ATG1	Heatshock	underestimated
STP2	128	0.9999	1.253e-4	2.506e-4	1	0.02181	0.02181	TPK123	Heatshock	overestimated
RDS1	33	0.9999	1.274e-4	2.549e-4	1	0.02218	0.02218	FUS3	GlucoseDepletion	overestimated
SFP1	92	0.9999	1.277e-4	2.555e-4	1	0.02223	0.02223	KIN1	Tunicamycin	overestimated
HCM1	161	0.9999	1.281e-4	2.562e-4	1	0.02229	0.02229	FUS3	Heatshock	overestimated
USV1	26	0.9999	1.297e-4	2.595e-4	1	0.02257	0.02257	IRE1	Salt	underestimated
SWI4	181	0.9999	1.303e-4	2.605e-4	1	0.02267	0.02267	HOG1	GlucoseDepletion	overestimated
USV1	462	0.9999	1.315e-4	2.631e-4	1	0.02288	0.02288	HOG1	Salt	overestimated
YER130C	167	0.9999	1.339e-4	2.679e-4	1	0.0233	0.0233	CTK1	Menadione	overestimated
SUT1	275	0.9999	1.365e-4	2.729e-4	1	0.02373	0.02373	CDC15	Menadione	underestimated
REI1	167	0.9999	1.401e-4	2.802e-4	1	0.02436	0.02436	CTK1	Menadione	overestimated
STP1	130	0.9999	1.402e-4	2.803e-4	1	0.02437	0.02437	SCH9	Azetidine	overestimated
MET31	30	0.9999	1.419e-4	2.838e-4	1	0.02467	0.02467	CDC5	Heatshock	underestimated
YER130C	31	0.9999	1.431e-4	2.863e-4	1	0.02488	0.02488	RIM15	Tunicamycin	underestimated
HAC1	17	0.9999	1.446e-4	2.891e-4	1	0.02512	0.02512	PHO85	Heatshock	underestimated
GSM1	412	0.9999	1.447e-4	2.894e-4	1	0.02514	0.02514	SSN3	Menadione	underestimated
MSN4	41	0.9999	1.46e-4	2.92e-4	1	0.02537	0.02537	TPK123	Azetidine	underestimated
TOD6	22	0.9999	1.461e-4	2.922e-4	1	0.02538	0.02538	TPK123	Rapamycin	underestimated
STB3	157	0.9999	1.468e-4	2.936e-4	1	0.02551	0.02551	TPK123	Salt	underestimated
NRG1	359	0.9999	1.476e-4	2.953e-4	1	0.02565	0.02565	YPK3	Heatshock	overestimated
GCN4	54	0.9999	1.481e-4	2.961e-4	1	0.02572	0.02572	RIM15	Menadione	overestimated
RDS1	130	0.9999	1.483e-4	2.965e-4	1	0.02576	0.02576	SCH9	Azetidine	overestimated
RSC30	275	0.9999	1.484e-4	2.968e-4	1	0.02578	0.02578	CDC15	Menadione	underestimated
YOX1	1100	0.9999	1.499e-4	2.997e-4	1	0.02603	0.02603	SCH9	Menadione	overestimated
SUT1	164	0.9998	1.501e-4	3.002e-4	1	0.02607	0.02607	YPK1	Tunicamycin	overestimated
MSN2	36	0.9998	1.525e-4	3.049e-4	1	0.02648	0.02648	TPK123	Tunicamycin	overestimated
PHO2	1075	0.9998	1.536e-4	3.073e-4	1	0.02668	0.02668	YPK1	Menadione	overestimated
SFL1	29	0.9998	1.557e-4	3.114e-4	1	0.02704	0.02704	KSP1	GlucoseDepletion	underestimated
YLL054C	208	0.9998	1.571e-4	3.143e-4	1	0.02728	0.02728	HOG1	GlucoseDepletion	underestimated
HSF1	249	0.9998	1.577e-4	3.154e-4	1	0.02738	0.02738	SNF1	Menadione	underestimated
RSC3	315	0.9998	1.619e-4	3.237e-4	1	0.02808	0.02808	PBS2	Salt	underestimated
MET32	365	0.9998	1.651e-4	3.302e-4	1	0.02864	0.02864	YPK3	Menadione	overestimated
DAL81	130	0.9998	1.676e-4	3.351e-4	1	0.02906	0.02906	SCH9	Azetidine	overestimated
YAP7	84	0.9998	1.691e-4	3.383e-4	1	0.02933	0.02933	YPK1	Azetidine	overestimated
YER130C	26	0.9998	1.696e-4	3.392e-4	1	0.02941	0.02941	IRE1	Salt	underestimated
TYE7	201	0.9998	1.714e-4	3.429e-4	1	0.02972	0.02972	SNF1	GlucoseDepletion	underestimated
NRG1	97	0.9998	1.726e-4	3.452e-4	1	0.02992	0.02992	PKC1	Menadione	underestimated
TDA9	573	0.9998	1.746e-4	3.492e-4	1	0.03026	0.03026	YPK1	Heatshock	overestimated
ABF1	681	0.9998	1.772e-4	3.545e-4	1	0.03071	0.03071	RIM11	Heatshock	underestimated
MET31	47	0.9998	1.79e-4	3.58e-4	1	0.03101	0.03101	YAK1	Tunicamycin	underestimated
MSN2	140	0.9998	1.804e-4	3.609e-4	1	0.03126	0.03126	PBS2	Menadione	underestimated
YER130C	46	0.9998	1.807e-4	3.614e-4	1	0.0313	0.0313	YPK1	Fluconazole	underestimated
ECM22	13	0.9998	1.816e-4	3.632e-4	1	0.03146	0.03146	CTK1	Heatshock	underestimated
UGA3	31	0.9998	1.818e-4	3.637e-4	1	0.0315	0.0315	RIM15	Tunicamycin	underestimated
RSC30	183	0.9998	1.819e-4	3.638e-4	1	0.03151	0.03151	CDC15	Heatshock	overestimated
SUT1	183	0.9998	1.825e-4	3.65e-4	1	0.03161	0.03161	CDC15	Heatshock	overestimated
YPR022C	365	0.9998	1.831e-4	3.661e-4	1	0.03171	0.03171	YPK3	Menadione	overestimated
YLL054C	33	0.9998	1.873e-4	3.746e-4	1	0.03243	0.03243	FUS3	GlucoseDepletion	overestimated
RGM1	365	0.9998	1.886e-4	3.771e-4	1	0.03264	0.03264	YPK3	Menadione	overestimated
MIG2	59	0.9998	1.889e-4	3.777e-4	1	0.0327	0.0327	YPK3	Salt	underestimated
MSN2	231	0.9998	1.899e-4	3.797e-4	1	0.03286	0.03286	PBS2	GlucoseDepletion	overestimated
STB3	197	0.9998	1.901e-4	3.803e-4	1	0.03291	0.03291	HOG1	Menadione	underestimated
YGR067C	573	0.9998	1.917e-4	3.834e-4	1	0.03318	0.03318	YPK1	Heatshock	overestimated
TBF1	170	0.9998	1.93e-4	3.86e-4	1	0.0334	0.0334	SCH9	YPD	overestimated
DAL82	43	0.9998	1.949e-4	3.898e-4	1	0.03372	0.03372	SSN3	Salt	overestimated
SRD1	105	0.9998	1.971e-4	3.943e-4	1	0.0341	0.0341	CDC15	Menadione	overestimated
ADR1	59	0.9998	1.977e-4	3.954e-4	1	0.0342	0.0342	YPK3	Salt	underestimated
ABF1	489	0.9998	1.987e-4	3.974e-4	1	0.03436	0.03436	CDC7	Salt	overestimated
MET28	130	0.9998	2e-4	4.001e-4	1	0.0346	0.0346	SCH9	Azetidine	overestimated
HAC1	181	0.9998	2.025e-4	4.05e-4	1	0.03501	0.03501	HOG1	GlucoseDepletion	overestimated
TYE7	155	0.9998	2.11e-4	4.221e-4	1	0.03646	0.03646	TPK123	Heatshock	underestimated
RSC30	355	0.9998	2.12e-4	4.241e-4	1	0.03663	0.03663	YPK1	GlucoseDepletion	underestimated
REI1	148	0.9998	2.133e-4	4.265e-4	1	0.03684	0.03684	IRE1	Menadione	overestimated
RGM1	290	0.9998	2.134e-4	4.268e-4	1	0.03686	0.03686	FUS3	Heatshock	underestimated
RDS1	365	0.9998	2.134e-4	4.268e-4	1	0.03686	0.03686	YPK3	Menadione	overestimated
NCU00019	196	0.9998	2.139e-4	4.278e-4	1	0.03694	0.03694	HOG1	Fluconazole	overestimated
YER130C	109	0.9998	2.164e-4	4.327e-4	1	0.03736	0.03736	TOR2	GlucoseDepletion	overestimated
SKN7	164	0.9998	2.236e-4	4.472e-4	1	0.03859	0.03859	SLT2	Menadione	overestimated
YLL054C	355	0.9998	2.245e-4	4.49e-4	1	0.03874	0.03874	YPK1	GlucoseDepletion	underestimated
MIG1	59	0.9998	2.295e-4	4.591e-4	1	0.03959	0.03959	YPK3	Salt	underestimated
MET31	573	0.9998	2.298e-4	4.597e-4	1	0.03964	0.03964	YPK1	Heatshock	overestimated
IME1	16	0.9998	2.312e-4	4.624e-4	1	0.03988	0.03988	RIM11	GlucoseDepletion	underestimated
CRZ1	63	0.9998	2.329e-4	4.658e-4	1	0.04016	0.04016	CDC7	Heatshock	underestimated
MET31	20	0.9998	2.336e-4	4.671e-4	1	0.04027	0.04027	RIM15	Heatshock	overestimated
RPN4	38	0.9998	2.361e-4	4.721e-4	1	0.04069	0.04069	TPK123	Rapamycin	overestimated
RPH1	231	0.9998	2.386e-4	4.771e-4	1	0.04112	0.04112	PBS2	GlucoseDepletion	overestimated
USV1	45	0.9998	2.401e-4	4.802e-4	1	0.04138	0.04138	SCH9	Heatshock	overestimated
CBF1	17	0.9998	2.45e-4	4.899e-4	1	0.0422	0.0422	PHO85	Salt	overestimated
CUP2	1100	0.9998	2.454e-4	4.909e-4	1	0.04228	0.04228	SCH9	Menadione	overestimated
STB3	5	0.9998	2.456e-4	4.912e-4	1	0.0423	0.0423	KSP1	Rapamycin	underestimated
MIG3	59	0.9998	2.457e-4	4.914e-4	1	0.04232	0.04232	YPK3	Salt	underestimated
ADR1	26	0.9998	2.486e-4	4.972e-4	1	0.04281	0.04281	IRE1	Salt	underestimated
RTG3	181	0.9997	2.5e-4	5e-4	1	0.04305	0.04305	HOG1	GlucoseDepletion	overestimated
TYE7	130	0.9997	2.504e-4	5.008e-4	1	0.04311	0.04311	SCH9	Azetidine	overestimated
RDS1	69	0.9997	2.552e-4	5.104e-4	1	0.04392	0.04392	SSN3	Heatshock	overestimated
RPN4	365	0.9997	2.557e-4	5.114e-4	1	0.04401	0.04401	YPK3	Menadione	overestimated
CBF1	209	0.9997	2.562e-4	5.124e-4	1	0.04409	0.04409	PBS2	Menadione	overestimated
GIS1	617	0.9997	2.564e-4	5.128e-4	1	0.04412	0.04412	HOG1	Menadione	overestimated
CRZ1	181	0.9997	2.57e-4	5.141e-4	1	0.04423	0.04423	HOG1	GlucoseDepletion	overestimated
MSN2	22	0.9997	2.583e-4	5.165e-4	1	0.04444	0.04444	TPK123	Rapamycin	underestimated
SKN7	33	0.9997	2.612e-4	5.223e-4	1	0.04492	0.04492	FUS3	GlucoseDepletion	overestimated
YNR063W	69	0.9997	2.612e-4	5.224e-4	1	0.04493	0.04493	SSN3	Heatshock	overestimated
SWI4	41	0.9997	2.619e-4	5.238e-4	1	0.04505	0.04505	IRE1	Salt	overestimated
RPN4	403	0.9997	2.651e-4	5.302e-4	1	0.04558	0.04558	RIM11	Azetidine	underestimated
SUT1	581	0.9997	2.662e-4	5.324e-4	1	0.04577	0.04577	CDC15	Tunicamycin	overestimated
RLM1	1100	0.9997	2.686e-4	5.373e-4	1	0.04618	0.04618	SCH9	Menadione	overestimated
MET32	30	0.9997	2.692e-4	5.385e-4	1	0.04628	0.04628	CDC5	Heatshock	underestimated
MSN4	155	0.9997	2.703e-4	5.407e-4	1	0.04647	0.04647	TPK123	Heatshock	underestimated
YER130C	183	0.9997	2.716e-4	5.433e-4	1	0.04668	0.04668	CDC15	Heatshock	overestimated
PHO2	410	0.9997	2.717e-4	5.433e-4	1	0.04669	0.04669	KIN1	Menadione	underestimated
GIS1	109	0.9997	2.722e-4	5.443e-4	1	0.04677	0.04677	TOR2	GlucoseDepletion	overestimated
MSN4	140	0.9997	2.742e-4	5.483e-4	1	0.0471	0.0471	PBS2	Menadione	underestimated
TDA9	69	0.9997	2.754e-4	5.509e-4	1	0.04732	0.04732	SSN3	Heatshock	overestimated
RGM1	231	0.9997	2.761e-4	5.521e-4	1	0.04742	0.04742	PBS2	GlucoseDepletion	overestimated
MSN4	36	0.9997	2.798e-4	5.597e-4	1	0.04806	0.04806	TPK123	Tunicamycin	overestimated
AFT2	355	0.9997	2.802e-4	5.604e-4	1	0.04812	0.04812	YPK1	GlucoseDepletion	underestimated
INO4	22	0.9997	2.809e-4	5.619e-4	1	0.04824	0.04824	CTK1	GlucoseDepletion	underestimated
CAT8	13	0.9997	2.809e-4	5.618e-4	1	0.04824	0.04824	CTK1	Heatshock	underestimated
MET32	573	0.9997	2.843e-4	5.686e-4	1	0.0488	0.0488	YPK1	Heatshock	overestimated
GAL4	85	0.9997	2.874e-4	5.748e-4	1	0.04932	0.04932	YPK1	YPD	overestimated
LEU3	239	0.9997	2.913e-4	5.826e-4	1	0.04998	0.04998	MRK1	Azetidine	underestimated
